# Supplementary material for: Small Molecule CD38 Inhibitors: Synthesis of 8-Amino-N1-inosine 5′-monophosphate, Analogues and Early Structure-Activity Relationship
Source: MDPI journal article supplement (doi:10.3390/molecules26237165), 2021-11-26
Supplement: s1 [file s1]

## Supplementary Information

### Small Molecule CD38 Inhibitors: Synthesis of 8-Amino-*N*1-Inosine 5'-Monophosphate, Analogues and Early Structure-Activity Relationship

Joanna M. Watt<sup>1,2</sup>, Richard Graeff<sup>3</sup> and Barry V. L. Potter<sup>1\*</sup>

<sup>1</sup> Medicinal Chemistry & Drug Discovery, Department of Pharmacology, University of Oxford, Mansfield Road, Oxford, OX1 3QT, UK

<sup>2</sup> Wolfson Laboratory of Medicinal Chemistry, Department of Pharmacy and Pharmacology, University of Bath, Claverton Down, Bath, BA2 7AY, UK

<sup>3</sup> Department of Physiology, University of Hong Kong, Hong Kong, China

#### **Contents**

|                                                                                                       |       |
|-------------------------------------------------------------------------------------------------------|-------|
| Figure S1: Hydrolysis of 8-NH <sub>2</sub> - <i>N</i> 1-IMP by high concentration of CD38 - HPLC data | p2    |
| <sup>1</sup> H, <sup>13</sup> C-NMR and HPLC data                                                     | p3-56 |

**Figure S1: Hydrolysis of 8-NH<sub>2</sub>-N1-IMP by high concentration of CD38 - HPLC data**

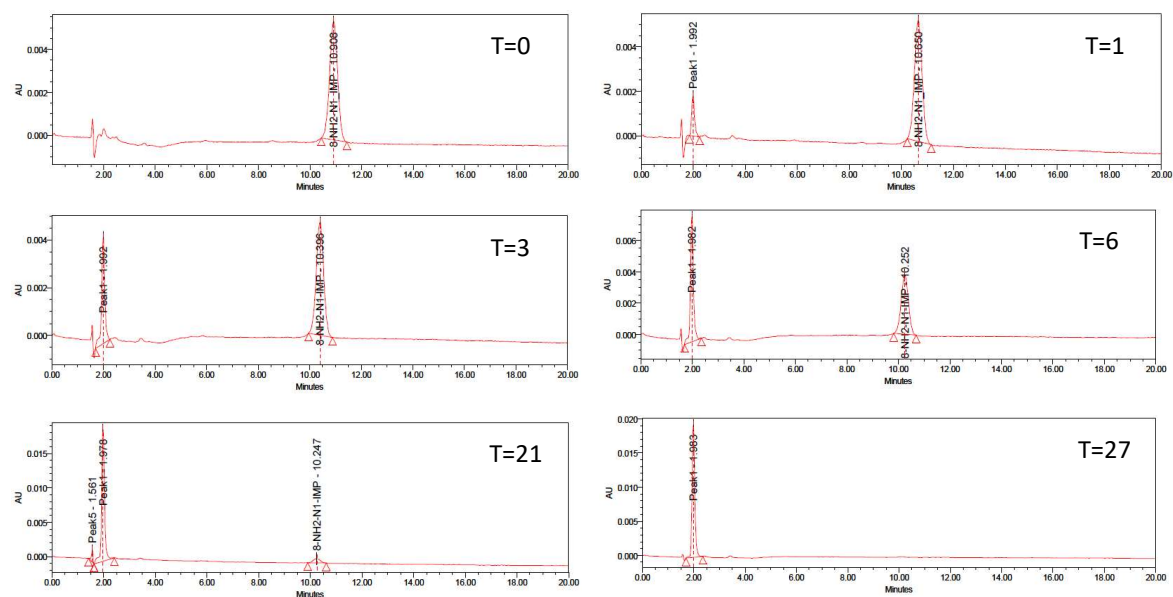

HPLC traces showing 8-NH<sub>2</sub>-N1-IMP (**11**) is turned over by high concentrations of CD38. HPLC conditions: eluting at 1 mL/min with an isocratic ion-pair buffer: 0.17% (m/v) cetrимide and 45% (v/v) phosphate buffer (pH 6.4) in MeOH. Time (T) in hours from addition of CD38.

# **Synthesis of 8-NH<sub>2</sub>-N1-IMP (11)**

JMS 834 T 13-15

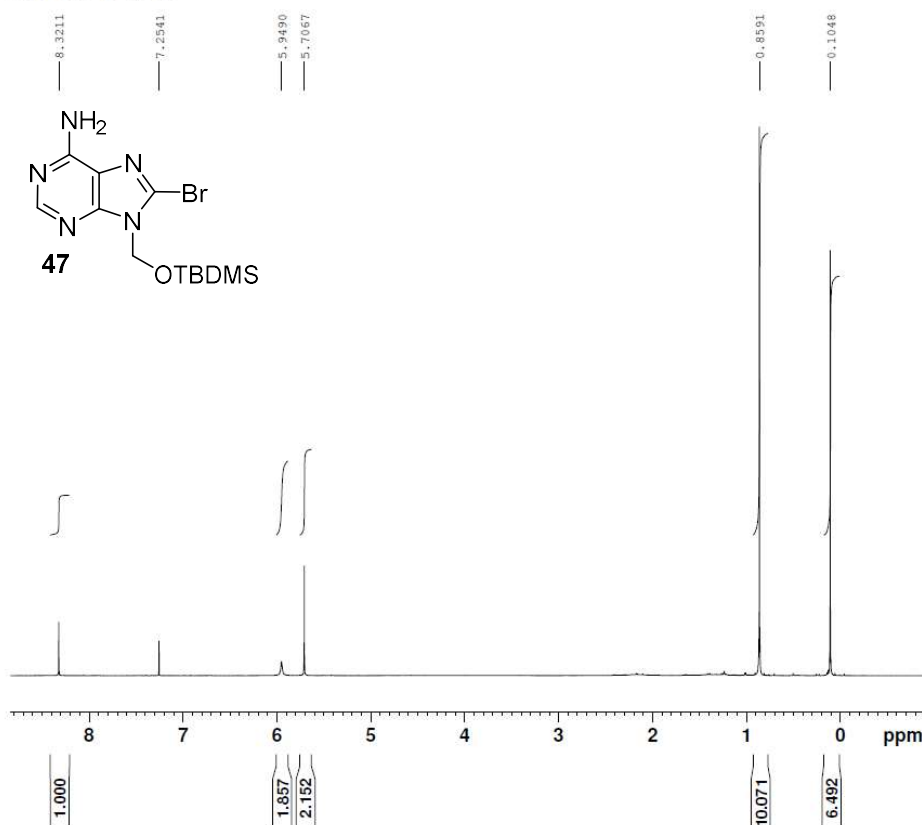

Current Data Parameters  
NAME Jun18-2013-JMS28908  
EXPNO 10  
PROCNO 1

F2 - Acquisition Parameters  
Date\_ 20130618  
Time 17.34  
INSTRUM AVIII400  
PROBHD 5 mm PABBO BB-  
PULPROG zg30  
TD 65536  
SOLVENT CDCl3  
NS 16  
DS 2  
SWH 8223.685 Hz  
FIDRES 0.125483 Hz  
AQ 3.9845889 sec  
RG 114  
DW 60.800 usec  
DE 17.48 usec  
TE 293.2 K  
D1 1.00000000 sec  
TD0 1

===== CHANNEL f1 =====  
NUC1 1H  
P1 11.90 usec  
PL1 -1.00 dB  
PL1W 12.26963711 W  
SFO1 400.0424704 MHz

F2 - Processing parameters  
SI 65536  
SF 400.0399837 MHz  
WDW EM  
SSB 0  
LB 0.20 Hz  
GB 0  
PC 1.00

JMS 834 T 13-15

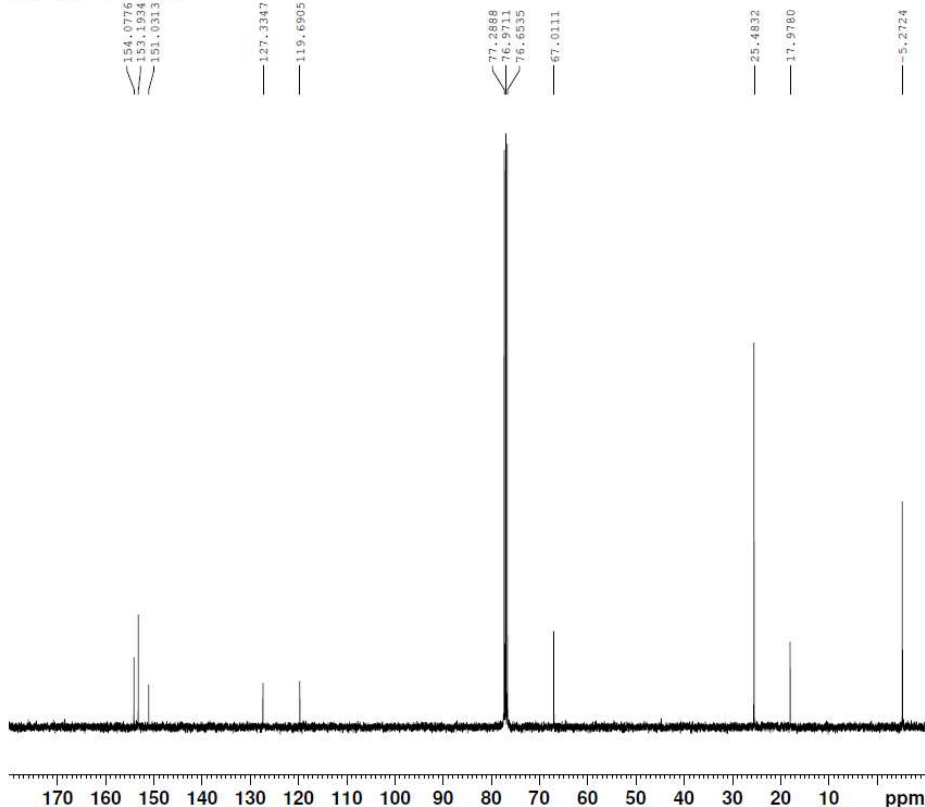

Current Data Parameters  
NAME Jun18-2013-JMS28908  
EXPNO 11  
PROCNO 1

F2 - Acquisition Parameters  
Date\_ 20130619  
Time 7.25  
INSTRUM AVIII400  
PROBHD 5 mm PABBO BB-  
PULPROG zgpg30  
TD 65536  
SOLVENT CDCl3  
NS 512  
DS 4  
SWH 24038.461 Hz  
FIDRES 0.366798 Hz  
AQ 1.3631488 sec  
RG 1820  
DW 20.800 usec  
DE 6.50 usec  
TE 293.2 K  
D1 2.00000000 sec  
D11 0.03000000 sec  
TD0 1

===== CHANNEL f1 =====  
NUC1 13C  
P1 8.75 usec  
PL1 -2.00 dB  
PL1W 58.91986084 W  
SFO1 100.6001970 MHz

===== CHANNEL f2 =====  
CPDPRG2 waltz16  
NUC2 1H  
PCPD2 80.00 usec  
PL2 -1.00 dB  
PL12 15.55 dB  
PL13 19.00 dB  
PL2W 12.26963711 W  
PL12W 0.27153867 W  
PL13W 0.12269637 W  
SFO2 400.0416002 MHz

F2 - Processing parameters  
SI 65536  
SF 100.5901380 MHz  
WDW EM  
SSB 0  
LB 1.00 Hz  
GB 0  
PC 1.40

JMS 835 T 9-11

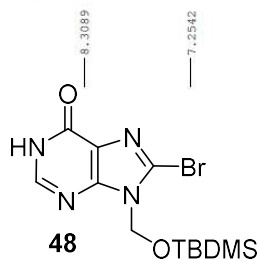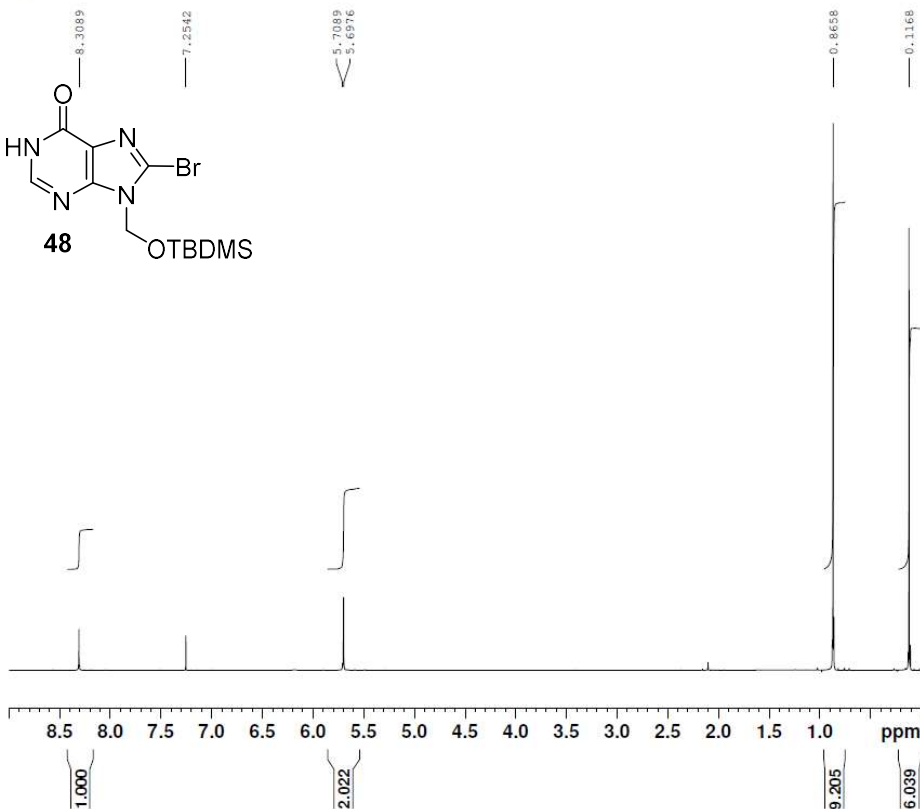

Current Data Parameters  
NAME Jun26-2013-JMS28987  
EXPNO 10  
PROCNO 1

F2 - Acquisition Parameters  
Date\_ 20130626  
Time 10.30  
INSTRUM AVIII400  
PROBHD 5 mm PABBO BB-  
PULPROG zg30  
TD 65536  
SOLVENT CDC13  
NS 16  
DS 2  
SWH 8223.685 Hz  
FIDRES 0.125483 Hz  
AQ 3.9845889 sec  
RG 90.5  
DW 60.800 usec  
DE 17.48 usec  
TE 293.2 K  
D1 1.00000000 sec  
TD0 1

===== CHANNEL f1 =====  
NUC1 1H  
P1 11.90 usec  
PL1 -1.00 dB  
PL1W 12.26963711 W  
SFO1 400.0424704 MHz

F2 - Processing parameters  
SI 65536  
SF 400.0399837 MHz  
WDW EM  
SSB 0  
LB 0.20 Hz  
GB 0  
PC 1.00

JMS 835 T 9-11

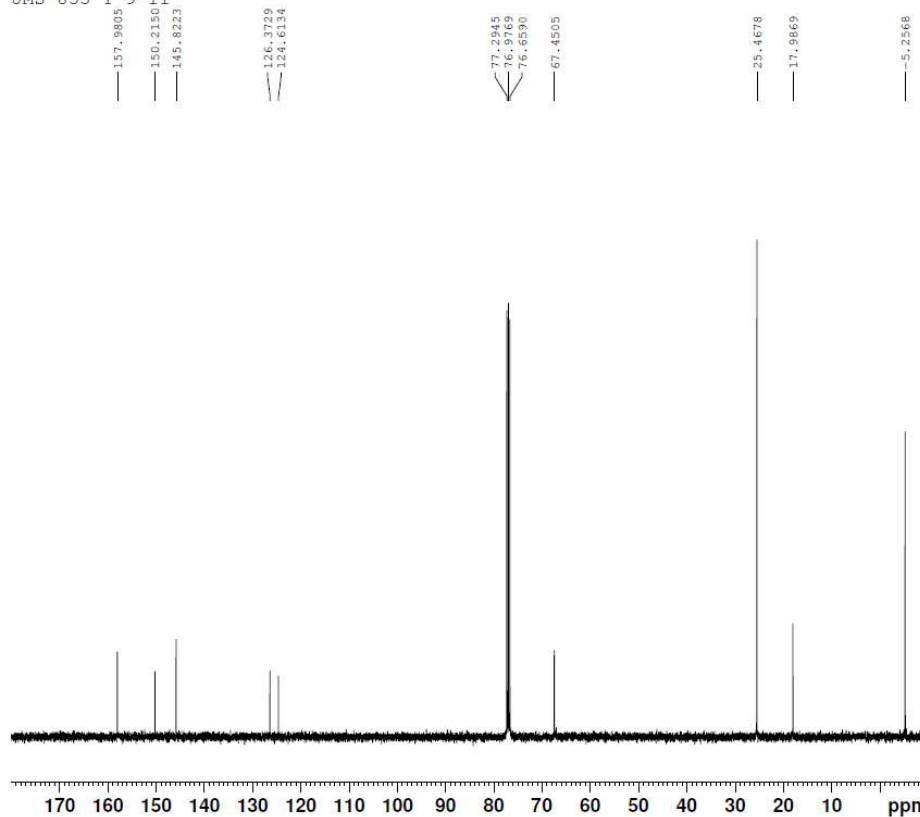

Current Data Parameters  
NAME Jun26-2013-JMS28987  
EXPNO 11  
PROCNO 1

F2 - Acquisition Parameters  
Date\_ 20130626  
Time 10.39  
INSTRUM AVIII400  
PROBHD 5 mm PABBO BB-  
PULPROG zgpg30  
TD 65536  
SOLVENT CDC13  
NS 256  
DS 4  
SWH 24038.461 Hz  
FIDRES 0.366798 Hz  
AQ 1.3631488 sec  
RG 1820  
DW 20.800 usec  
DE 6.50 usec  
TE 293.2 K  
D1 2.00000000 sec  
D11 0.03000000 sec  
TD0 1

===== CHANNEL f1 =====  
NUC1 13C  
P1 8.75 usec  
PL1 -2.00 dB  
PL1W 58.91986084 W  
SFO1 100.6001970 MHz

===== CHANNEL f2 =====  
CPDPRG2 waltz16  
NUC2 1H  
PCPD2 80.00 usec  
PL2 -1.00 dB  
PL12 15.55 dB  
PL13 19.00 dB  
PL2W 12.26963711 W  
PL12W 0.27153867 W  
PL13W 0.12269637 W  
SFO2 400.0416002 MHz

F2 - Processing parameters  
SI 65536  
SF 100.5901380 MHz  
WDW EM  
SSB 0  
LB 1.00 Hz  
GB 0  
PC 1.40

JMS 853 T 31, 33-34

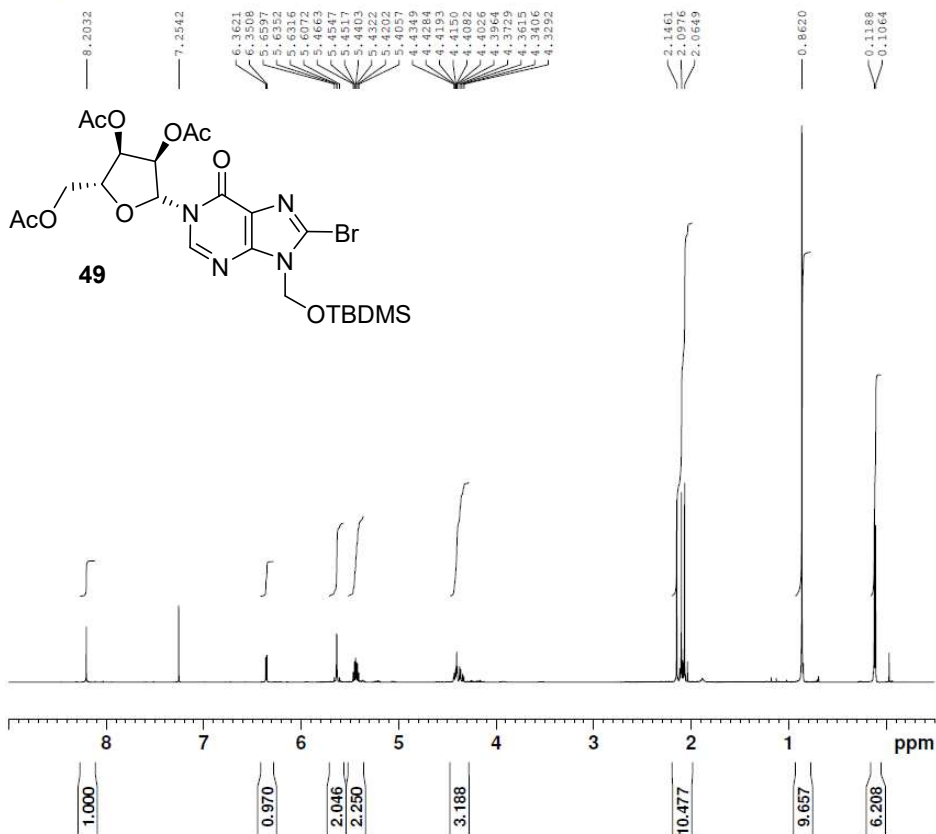

Current Data Parameters  
 NAME Aug01-2013-JMS29374  
 EXPNO 10  
 PROCNO 1  
 F2 - Acquisition Parameters  
 Date\_ 20130801  
 Time 12.45  
 INSTRUM AVIII400  
 PROBHD 5 mm PABBO BB-  
 PULPROG zg30  
 TD 65536  
 SOLVENT CDCl<sub>3</sub>  
 NS 16  
 DS 2  
 SWH 8223.685 Hz  
 FIDRES 0.125483 Hz  
 AQ 3.9845889 sec  
 RG 64  
 DW 60.800 usec  
 DE 17.48 usec  
 TE 293.2 K  
 D1 1.00000000 sec  
 TDO 1

===== CHANNEL f1 =====  
 NUC1 1H  
 P1 11.90 usec  
 PL1 -1.00 dB  
 PL1W 12.26963711 W  
 SFO1 400.0424704 MHz

F2 - Processing parameters  
 SI 65536  
 SF 400.0399837 MHz  
 WDW EM  
 SSB 0  
 LB 0.20 Hz  
 GB 0  
 PC 1.00

JMS 853 T 22

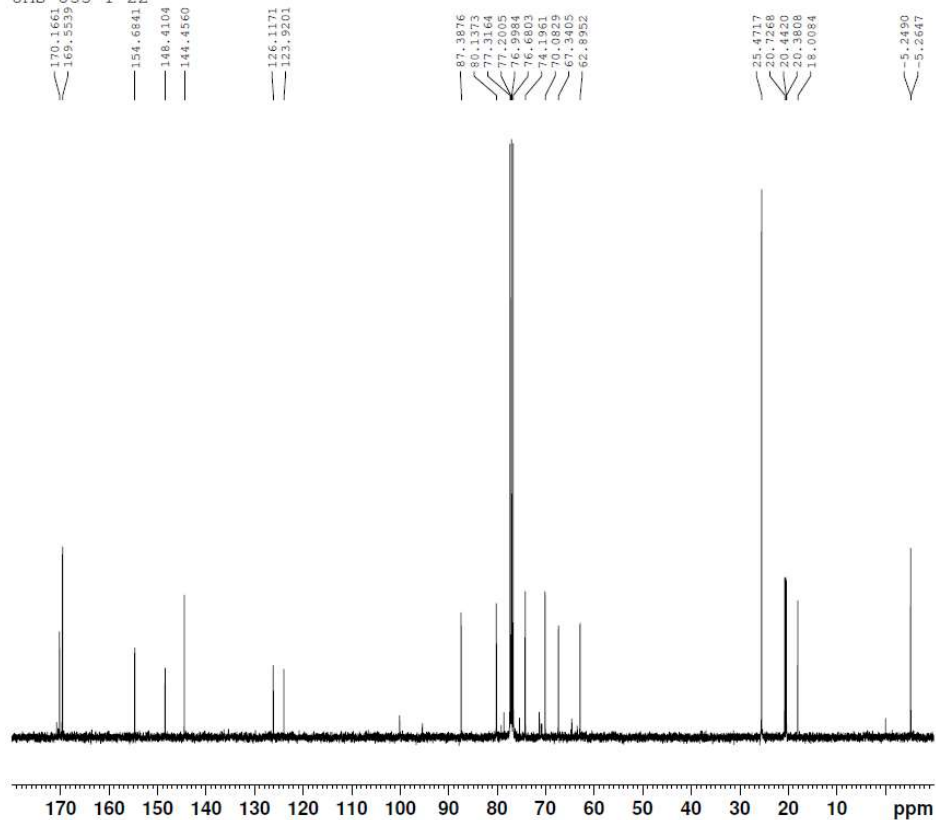

Current Data Parameters  
 NAME Jul31-2013-JMS29366  
 EXPNO 11  
 PROCNO 1

F2 - Acquisition Parameters  
 Date\_ 20130801  
 Time 4.40  
 INSTRUM AVIII400  
 PROBHD 5 mm PABBO BB-  
 PULPROG zgpg30  
 TD 65536  
 SOLVENT CDCl<sub>3</sub>  
 NS 512  
 DS 4  
 SWH 24038.461 Hz  
 FIDRES 0.366798 Hz  
 AQ 1.3631488 sec  
 RG 1820  
 DW 20.800 usec  
 DE 6.50 usec  
 TE 293.2 K  
 D1 2.00000000 sec  
 D11 0.03000000 sec  
 TDO 1

===== CHANNEL f1 =====  
 NUC1 13C  
 P1 8.75 usec  
 PL1 -2.00 dB  
 PL1W 58.91986084 W  
 SFO1 100.6001970 MHz

===== CHANNEL f2 =====  
 CPDPRG12 waltz16  
 NUC2 1H  
 PCPD2 80.00 usec  
 PL2 -1.00 dB  
 PL12 15.55 dB  
 PL13 19.00 dB  
 PL2W 12.26963711 W  
 PL12W 0.27153867 W  
 PL13W 0.12269637 W  
 SFO2 400.0416002 MHz

F2 - Processing parameters  
 SI 65536  
 SF 100.5901380 MHz  
 WDW EM  
 SSB 0  
 LB 1.00 Hz  
 GB 0  
 PC 1.40

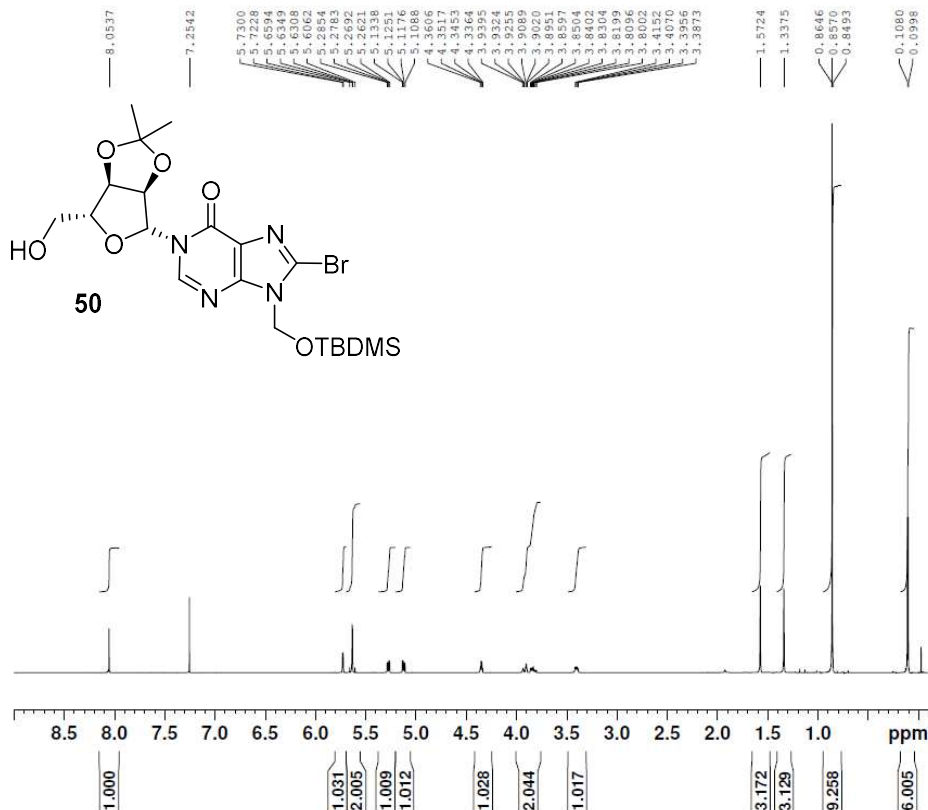

```
Current Data Parameters
NAME      Aug02-2013-JMS29398
EXPNO      10
PROCNO     1
```

```
F2 - Acquisition Parameters
Date_      20130802
Time       17:00
INSTRUM    AVI11407
PROBHWD    5 mm PABBO BB-
PULPROG     zg30
TD          65536
SOLVENT     CDCl3
NS          16
DS          2
SWH         8223.685 Hz
FIDRES      0.125483 Hz
AQ          3.9845889 sec
RG          64
DC          68.000 usec
DE          17.48 usec
TE          293.2 K
D1          1.00000000 sec
TDO         1
```

```

===== CHANNEL f1 =====
NUC1              1H
P1                 11.90 usec
PL1                -1.00 dB
PL1W               12.26963711 W
SFO1               400.0424704 MHz

```

```
F2 - Processing parameters
SI                65536
SF                400.0399837 MHz
WDW               EM
SSB               0
LB               0.20 Hz
GB               0
PC               1.00
```

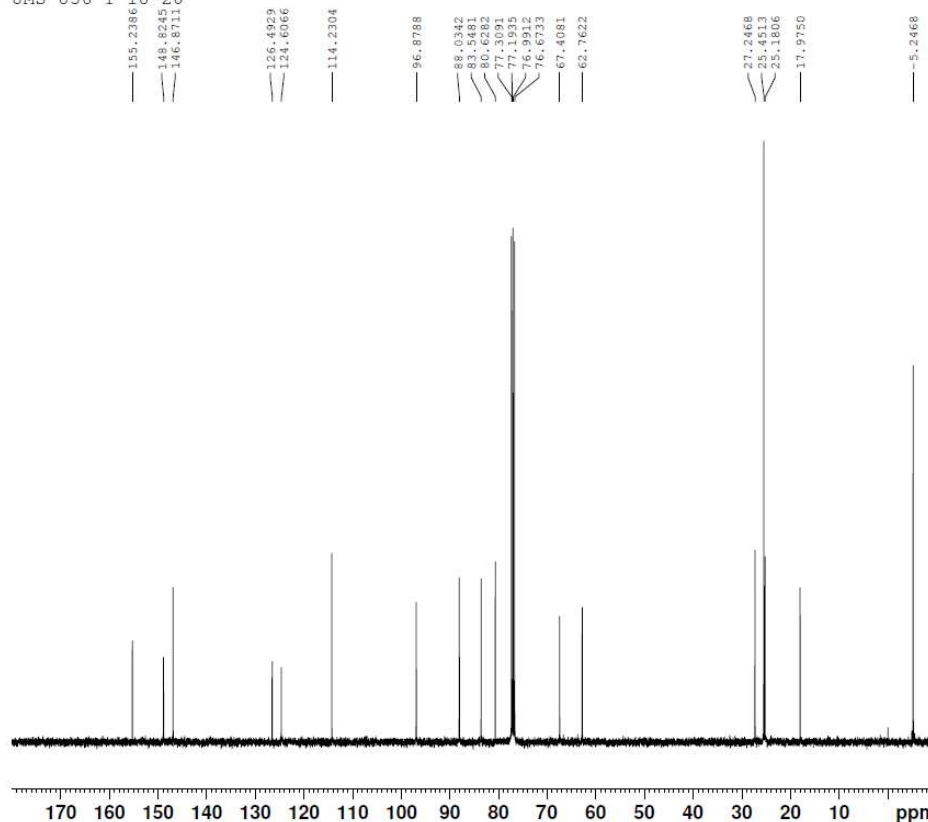

```
Current Data Parameters
NAME      Aug02-2013-JMS29398
EXPNO      11
PROCNO     1
```

```

F2 - Acquisition Parameters
Date_      20130803
Time       6.30
INSTRUM    AVII1400
PROBHD     5 mm PABBO 5B-
PULPROG    zgpg30
TD          65536
SOLVENT    CDCl3
NS          4
DS          2
SWH         24038.461 Hz
FIDRES     0.366798 Hz
AQ          1.3631488 sec
RG          1820
DE          20.800 usec
DW          6.50 usec
TE          293.2 K
D1          2.00000000 sec
D11         0.03000000 sec
TDO         1

```

```
===== CHANNEL f1 =====
NUC1                13C
P1                   8.75 usec
PL1                  -2.00 dB
PL1W                 58.91986084 W
SFO1                 100.6001970 MHz
```

```
===== CHANNEL f2 =====
CPDPRG[2]      waltz16
NUC2            1H
PCPD2           80.00 usec
PL2             -1.00 dB
PL12            15.55 dB
PL13            19.00 dB
PL2W            12.26963711 W
PL12W           0.27153867 W
PL13W           0.12269637 W
SF02            400.0416002 MHz
```

```
F2 - Processing parameters
SI                65536
SF                100.5901380 MHz
WDW              EM
SSB              0
LB               1.00 Hz
GB              0
PC              1.40
```

JMS 736 T 11-14

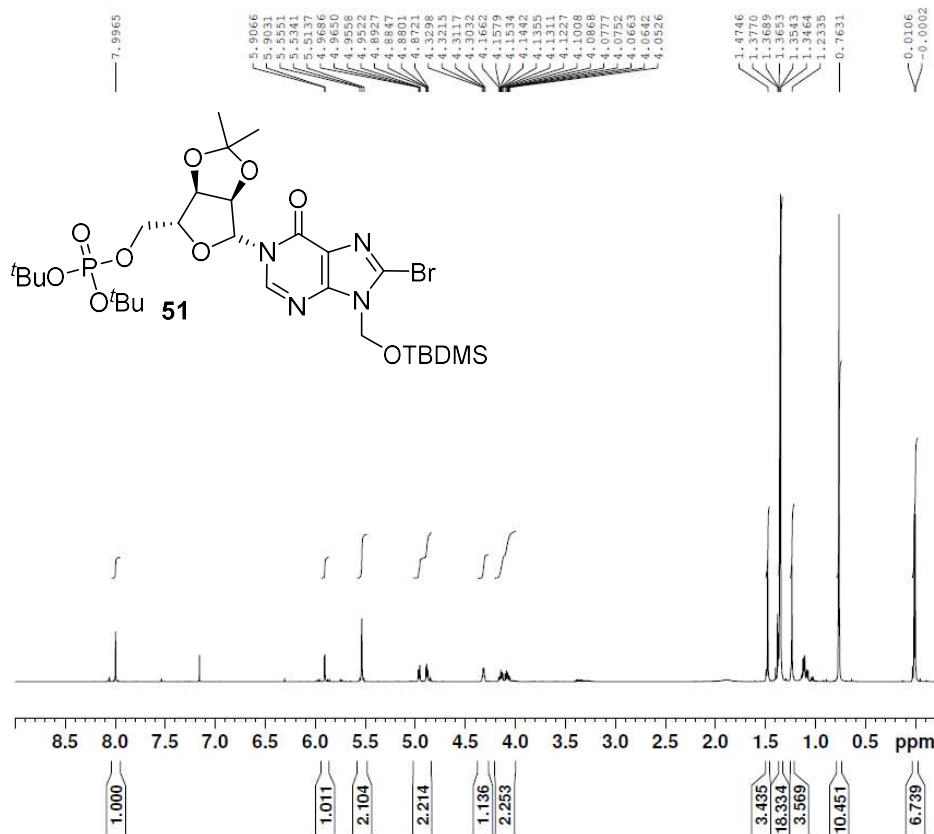

Current Data Parameters  
 NAME Aug31-2012-JMS736  
 EXPNO 10  
 PROCNO 1

F2 - Acquisition Parameters  
 Date\_ 20120831  
 Time 13.21  
 INSTRUM spect  
 PROBHD 5 mm PABBO BB-  
 PULPROG zg30  
 TD 65536  
 SOLVENT CDCl3  
 NS 16  
 DS 2  
 SWH 10330.578 Hz  
 FIDRES 0.157632 Hz  
 AQ 3.1719425 sec  
 RG 64  
 DW 48.400 usec  
 DE 13.94 usec  
 TE 298.0 K  
 D1 1.00000000 sec  
 TDO 1

===== CHANNEL f1 =====  
 NUC1 1H  
 P1 10.30 usec  
 PL1 -0.12 dB  
 PL1W 19.35150909 W  
 SFO1 500.1330885 MHz

F2 - Processing parameters  
 SI 32768  
 SF 500.1300644 MHz  
 WDW EM  
 SSB 0  
 LB 0.30 Hz  
 GB 0  
 PC 1.00

JMS 736 T 11-14

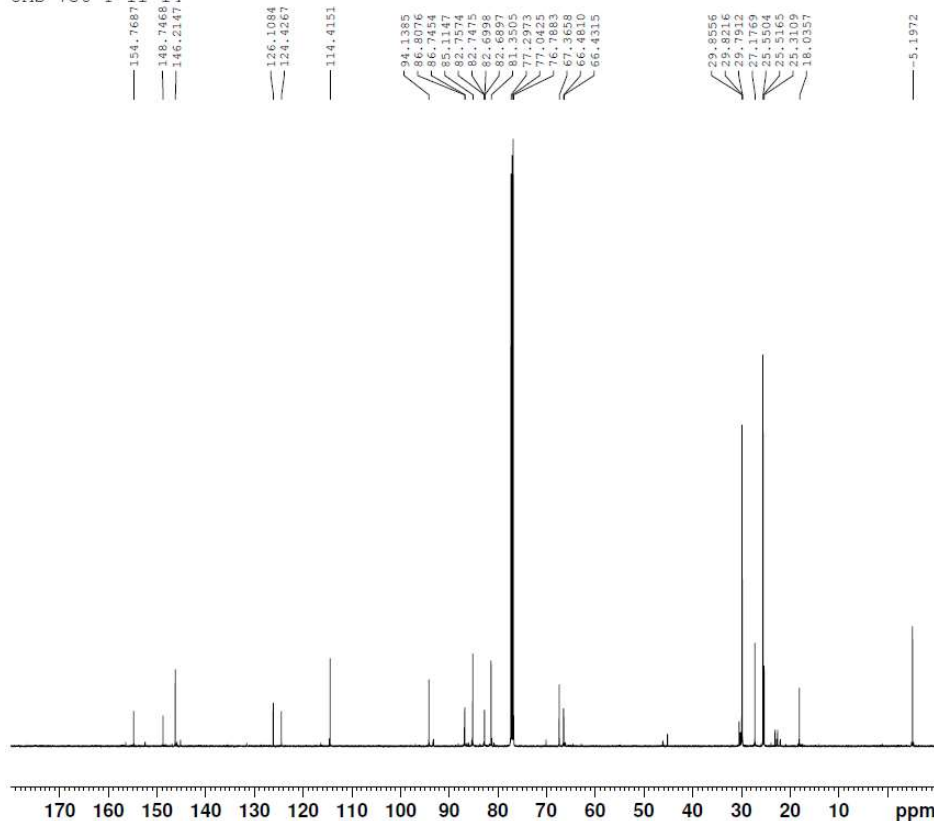

Current Data Parameters  
 NAME Aug31-2012-JMS736  
 EXPNO 12  
 PROCNO 1

F2 - Acquisition Parameters  
 Date\_ 20120831  
 Time 17.53  
 INSTRUM spect  
 PROBHD 5 mm PABBO BB-  
 PULPROG zgpg30  
 TD 65536  
 SOLVENT CDCl3  
 NS 5000  
 DS 4  
 SWH 29761.904 Hz  
 FIDRES 0.454131 Hz  
 AQ 1.1010048 sec  
 RG 2050  
 DW 16.800 usec  
 DE 8.43 usec  
 TE 298.0 K  
 D1 2.00000000 sec  
 D11 0.03000000 sec  
 TDO 1

===== CHANNEL f1 =====  
 NUC1 13C  
 P1 9.50 usec  
 PL1 -0.51 dB  
 PL1W 99.92730713 W  
 SFO1 125.7703643 MHz

===== CHANNEL f2 =====  
 CPDPRG[2] waltz16  
 NUC2 1H  
 PCPD2 80.00 usec  
 PL2 -0.12 dB  
 PL12 17.94 dB  
 PL13 21.00 dB  
 PL2W 19.35150909 W  
 PL12W 0.30249262 W  
 PL13W 0.14952536 W  
 SFO2 500.1320005 MHz

F2 - Processing parameters  
 SI 32768  
 SF 125.7577890 MHz  
 WDW EM  
 SSB 0  
 LB 1.00 Hz  
 GB 0  
 PC 1.40



JMS 746 HPLC again

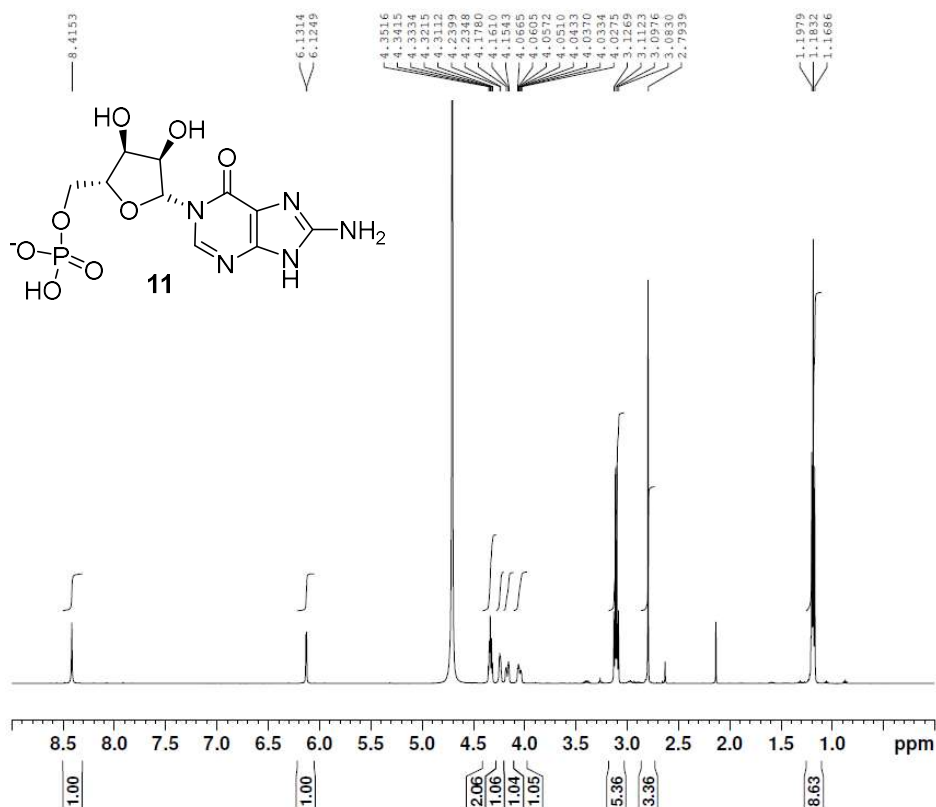

Current Data Parameters  
NAME Oct24-2012-JMS 746  
EXPNO 10  
PROCNO 1

F2 - Acquisition Parameters  
Date\_ 20121024  
Time 18.31  
INSTRUM spect  
PROBHD 5 mm PABBO BB-  
PULPROG zg30  
TD 65536  
SOLVENT D2O  
NS 128  
DS 0  
SWH 10330.578 Hz  
FIDRES 0.157632 Hz  
AQ 3.1719425 sec  
RG 80.6  
DW 48.400 usec  
DE 6.50 usec  
TE 297.9 K  
D1 2.00000000 sec  
TD0 1

===== CHANNEL f1 =====  
NUC1 1H  
P1 10.30 usec  
PL1 -0.12 dB  
PL1W 19.35150909 W  
SFO1 500.1330885 MHz

F2 - Processing parameters  
SI 32768  
SF 500.1300000 MHz  
WDW EM  
SSB 0  
LB 0.30 Hz  
GB 0  
PC 1.00

JMS 746 HPLC again

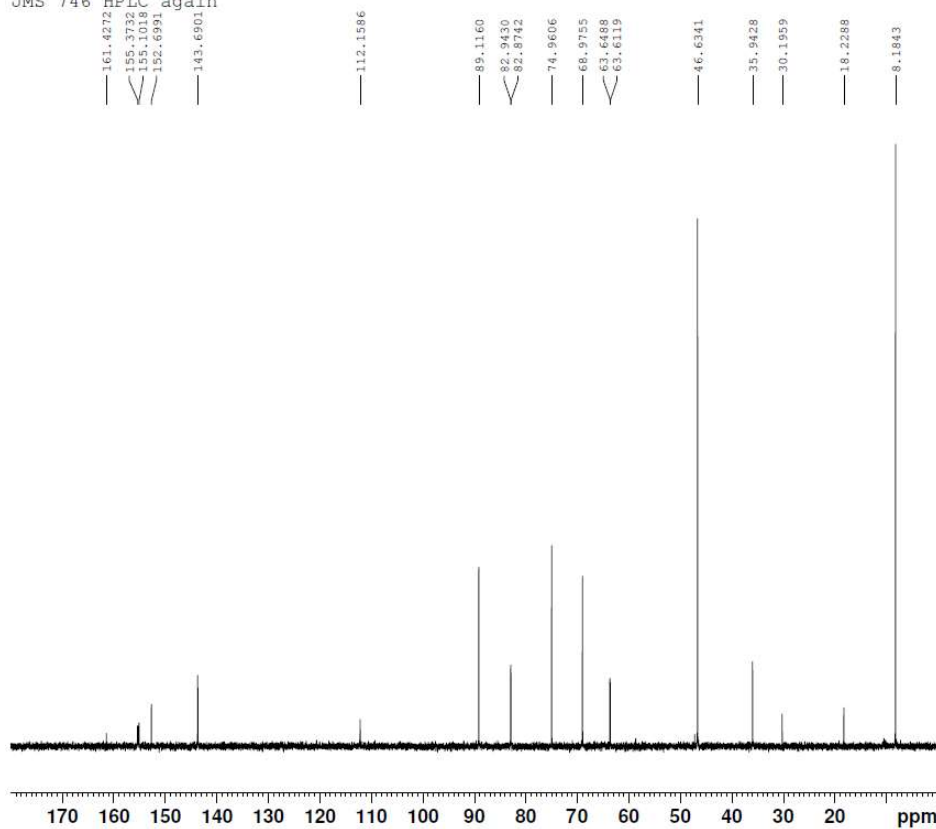

Current Data Parameters  
NAME Oct24-2012-JMS 746  
EXPNO 12  
PROCNO 1

F2 - Acquisition Parameters  
Date\_ 20121025  
Time 5.18  
INSTRUM spect  
PROBHD 5 mm PABBO BB-  
PULPROG zgpg30  
TD 65536  
SOLVENT D2O  
NS 5000  
DS 4  
SWH 29761.904 Hz  
FIDRES 0.454131 Hz  
AQ 1.1010048 sec  
RG 2050  
DW 16.800 usec  
DE 8.43 usec  
TE 298.0 K  
D1 2.00000000 sec  
D11 0.03000000 sec  
TD0 1

===== CHANNEL f1 =====  
NUC1 13C  
P1 9.50 usec  
PL1 -0.51 dB  
PL1W 99.92730713 W  
SFO1 125.7703643 MHz

===== CHANNEL f2 =====  
CPDPRG2 waltz16  
NUC2 1H  
PCPD2 80.00 usec  
PL2 -0.12 dB  
PL12 17.94 dB  
PL13 21.00 dB  
PL2W 19.35150909 W  
PL12W 0.30249262 W  
PL13W 0.14952536 W  
SFO2 500.1320005 MHz

F2 - Processing parameters  
SI 32768  
SF 125.7577890 MHz  
WDW EM  
SSB 0  
LB 1.00 Hz  
GB 0  
PC 1.40



JMS 746 HPLC again

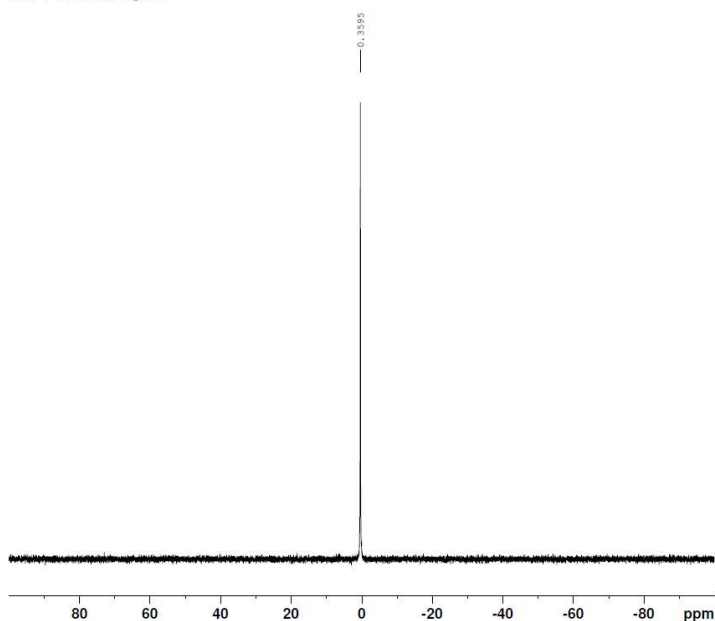

```

Current Data Parameters
NAME      Oct24-2012-JMS 746
EXPNO     11
PROCNO    1

F2 - Acquisition Parameters
Date_     20121024
Time      18.43
INSTRUM   spect
PROBHD    5 mm PABBO BB-
PULPROG   zgpg30
TD        65536
SOLVENT   D2O
NS         256
DS         4
SWH        81821.742 Hz
FIDRES     1.243823 Hz
AQ         0.4019541 sec
RG         2050
DW         6.133 usec
DE         6.50 usec
TE         297.9 K
D1         2.00000000 sec
D11        0.03000000 sec
TD0        1

===== CHANNEL f1 =====
NUC1       31P
P1         12.00 usec
PL1        -0.46 dB
PL1W       90.28126526 W
SFO1       202.4462121 MHz

===== CHANNEL f2 =====
CPDPRG2   waltz16
NUC2       1H
PCPD2      80.00 usec
PL2        -0.12 dB
PL12       17.94 dB
PL13       21.00 dB
PL1W       19.35150909 W
PL12W      0.30249262 W
PL13W      0.14952536 W
SFO2       500.1320005 MHz

F2 - Processing parameters
SI         32768
SF         202.4563350 MHz
WDW        EM
SSB         0
LB         1.00 Hz
GB         0
PC         1.40
  
```

## SAMPLE INFORMATION

Sample Name: JMS 746 hplc  
 Sample Type: Unknown  
 Vial: 2  
 Injection #: 1  
 Injection Volume: 10.00 ul  
 Run Time: 15.0 Minutes  
 Sample Set Name: JMS 3 deoxy and 746

Acquired By: Joanna  
 Date Acquired: 25/10/2012 2:59:32 PM  
 Acq. Method Set: isocratic new PDA Jo  
 Date Processed: 09/04/2021 3:09:01 PM  
 Processing Method: 8\_NH2\_N1\_IMP  
 Channel Name: Wwin Ch1  
 Proc. Chnl. Descr.: PDA 254.0 nm

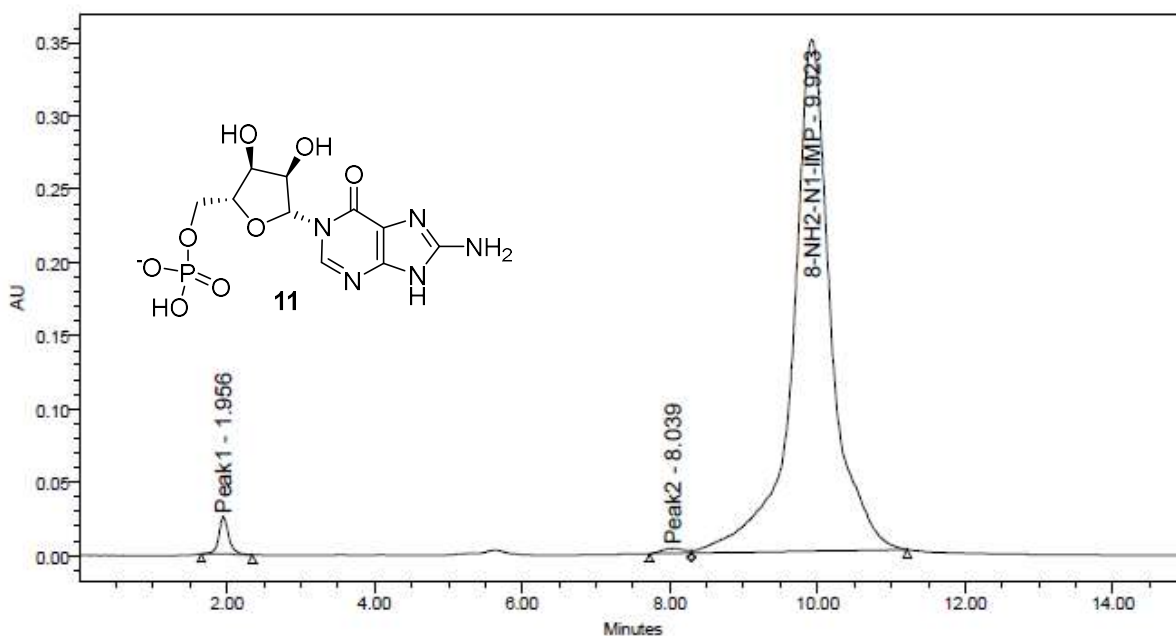

|   | Peak Name    | RT    | Area     | % Area | Height |
|---|--------------|-------|----------|--------|--------|
| 1 | Peak1        | 1.956 | 237655   | 1.84   | 25525  |
| 2 | Peak2        | 8.039 | 74802    | 0.58   | 3473   |
| 3 | 8-NH2-N1-IMP | 9.923 | 12615673 | 97.58  | 348912 |

# **N1-Ribosyl-inosine analogues (14-17):**

JMS 112 T 43-44

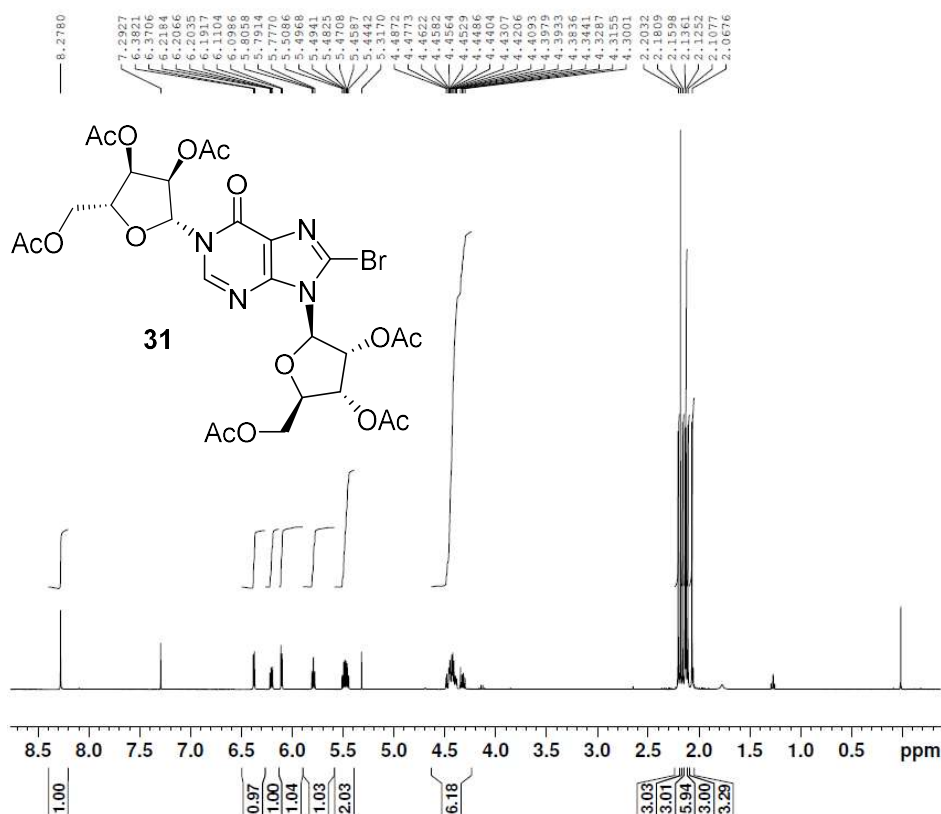

Current Data Parameters  
NAME Mar29-2010-JMS0334  
EXPNO 10  
PROCNO 1

F2 - Acquisition Parameters  
Date\_ 20100329  
Time 22.33  
INSTRUM AVIII400  
PROBHD 5 mm PABBO BB-  
PULPROG zg30  
TD 65536  
SOLVENT CDC13  
NS 16  
DS 2  
SWH 8223.685 Hz  
FIDRES 0.125483 Hz  
AQ 3.9845889 sec  
RG 114  
DW 60.800 usec  
DE 17.24 usec  
TE 298.0 K  
D1 1.00000000 sec  
TD0 1

===== CHANNEL f1 =====  
NUC1 1H  
P1 13.00 usec  
PL1 0 dB  
PL1W 9.74611950 W  
SFO1 400.0424704 MHz

F2 - Processing parameters  
SI 65536  
SF 400.0400000 MHz  
WDW EM  
SSB 0  
LB 0.20 Hz  
GB 0  
PC 1.00

JMS 112 T 43-44

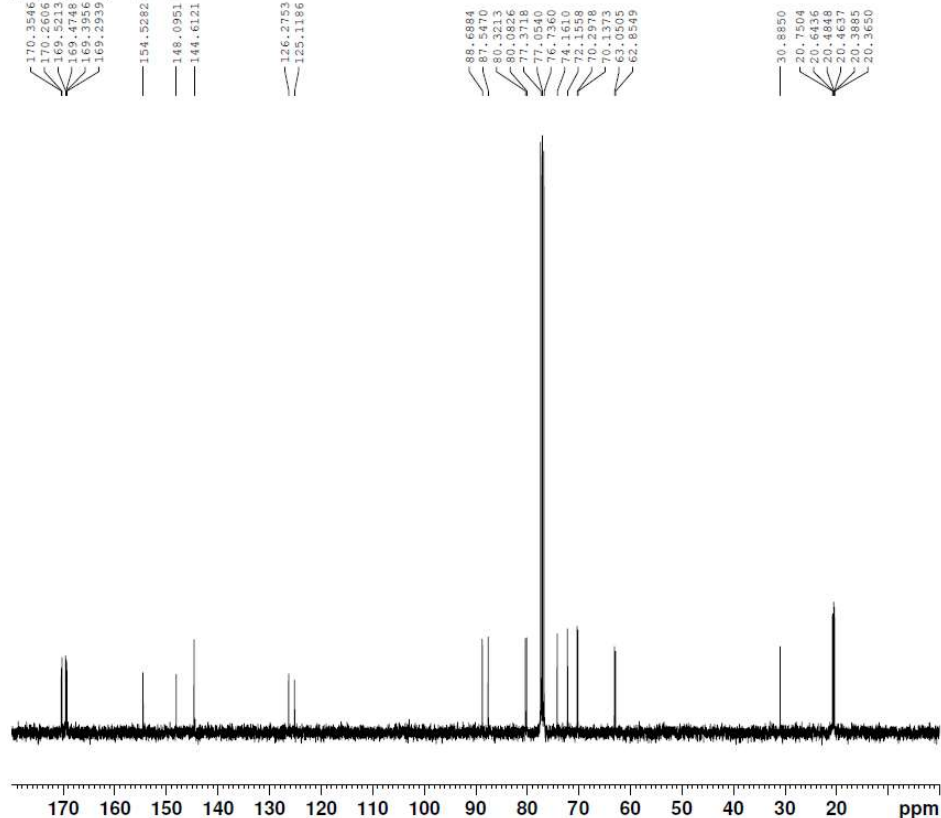

Current Data Parameters  
NAME Mar29-2010-JMS0334  
EXPNO 17  
PROCNO 1

F2 - Acquisition Parameters  
Date\_ 20100330  
Time 9.54  
INSTRUM AVIII400  
PROBHD 5 mm PABBO BB-  
PULPROG zgpg30  
TD 65536  
SOLVENT CDC13  
NS 256  
DS 4  
SWH 24038.461 Hz  
FIDRES 0.366798 Hz  
AQ 1.3631488 sec  
RG 2050  
DW 20.800 usec  
DE 6.50 usec  
TE 298.0 K  
D1 2.00000000 sec  
D11 0.03000000 sec  
TD0 1

===== CHANNEL f1 =====  
NUC1 13C  
P1 8.75 usec  
PL1 -2.00 dB  
PL1W 58.91986084 W  
SFO1 100.6001970 MHz

===== CHANNEL f2 =====  
CPDPRG[2] waltz16  
NUC2 1H  
PCPD2 80.00 usec  
PL2 0 dB  
PL12 15.78 dB  
PL13 19.00 dB  
PL2W 9.74611950 W  
PL12W 0.25753233 W  
PL13W 0.12269637 W  
SFO2 400.0416002 MHz

F2 - Processing parameters  
SI 65536  
SF 100.5901380 MHz  
WDW EM  
SSB 0  
LB 1.00 Hz  
GB 0  
PC 1.40

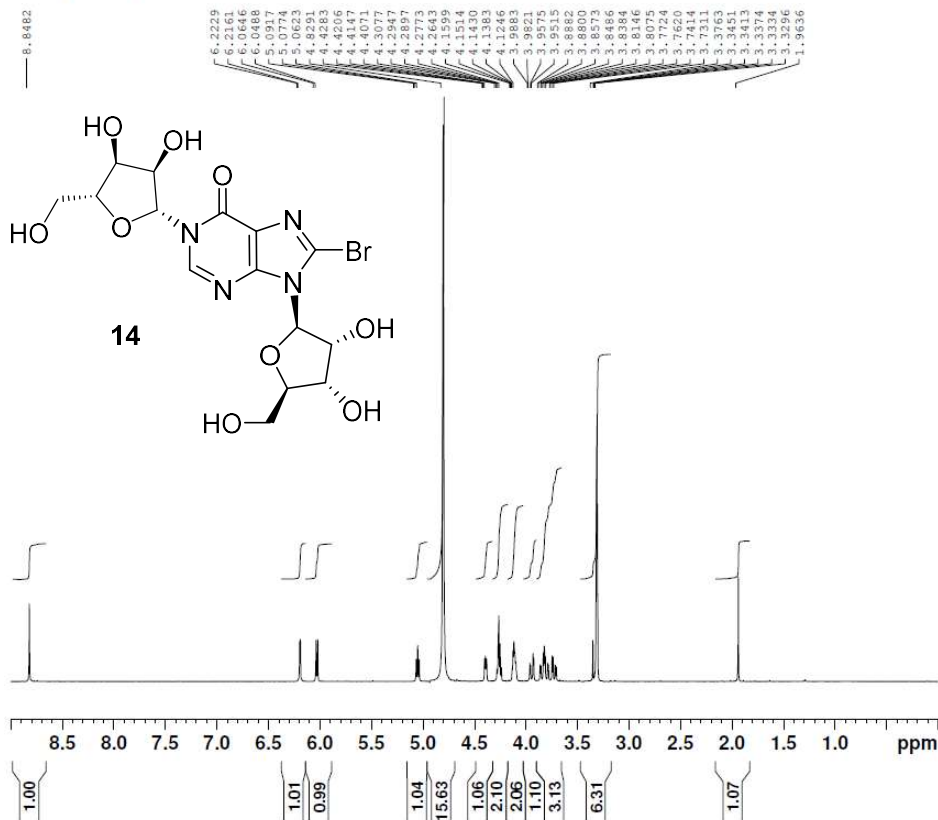

```
Current Data Parameters
NAME      Mar31-2010-JMS0372
EXPNO      10
PROCNO     1
```

```

F2 - Acquisition Parameters
Date_          20100331
Time_         11.33
INSTRUM       AVIII400
PROBHD        5 mm PABBO BB-
PULPROG       zg30
TD            65536
SOLVENT       MeOD
NS            16
DS            2
SWH           8223.685 Hz
FIDRES        0.125483 Hz
AQ            3.9845889 sec
RG            144
DEW           60.800 usec
DE            6.50 usec
TE            298.0 K
D1            1.00000000 sec
TDO           1

```

```
===== CHANNEL f1 =====
NUC1                1H
P1                  13.00 usec
PL1                 0 dB
PL1W                9.74611950 W
SFO1                400.0424704 MHz
```

|                            |                 |
|----------------------------|-----------------|
| F2 - Processing parameters |                 |
| SI                         | 32768           |
| SF                         | 400.0400110 MHz |
| WDW                        | EM              |
| SSB                        | 0               |
| LB                         | 0.30 Hz         |
| GB                         | 0               |
| PC                         | 1.00            |

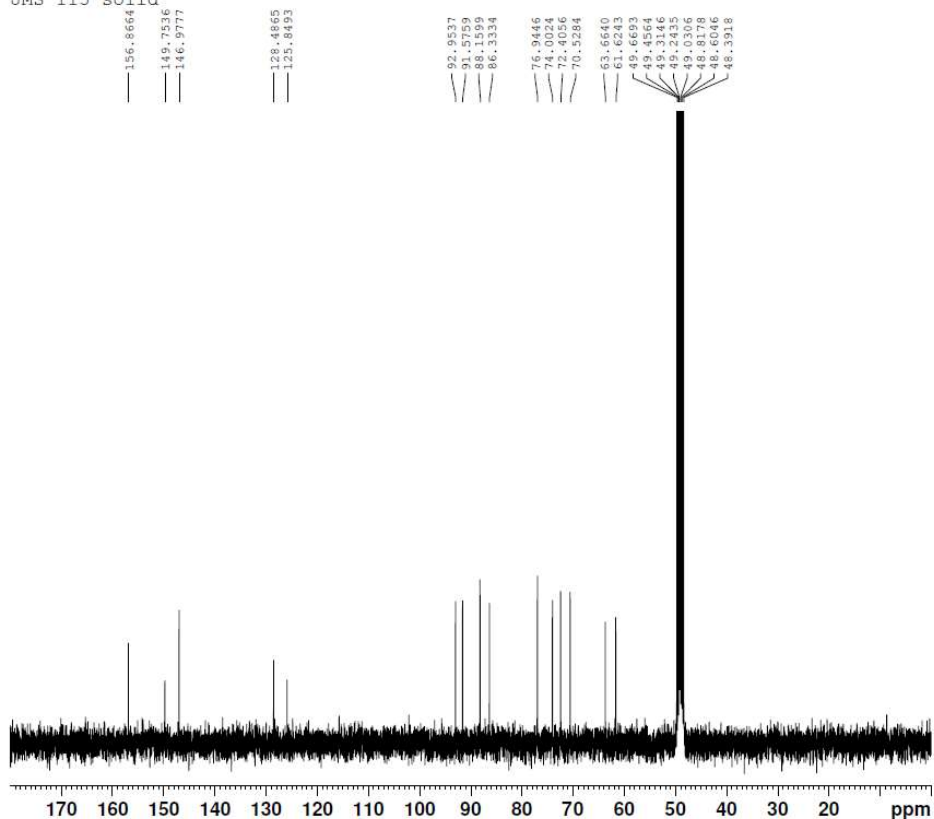

```
Current Data Parameters
NAME      Mar31-2010-JMS0372
EXPNO      11
PROCNO     1
```

```

F2 - Acquisition Parameters
Date_          20100331
Time_          14.59
INSTRUM        AVII1400
PROBHD         5 mm PABBO BB-
PULPROG        zgpg30
TD             65536
SOLVENT        MeOD
NS             512
DS             4
SWH            24038.461 Hz
FIDRES         0.366798 Hz
AQ            1.3631488 sec
RG            2050
DW            20.800 usec
DE            6.50 usec
TE            298.0 K
D1            2.0000000 sec
D11           0.0300000 sec
TD0           1

```

```

===== CHANNEL f1 =====
NUC1                13C
P1                   8.75 usec
PL1                  -2.00 dB
PL1W                 58.91986084 W
SF01                 100.6001970 MHz

```

```

===== CHANNEL f2 =====
CPDPRG[2]          waltz16
NUC2                1H
PCPD2              80.00 usec
PL2                 0 dB
PL12               15.78 dB
PL13               19.00 dB
PL2W               9.74611950 W
PL12W              0.25753233 W
PL13W              0.12269637 W
SFO2               400.0416002 MHz

```

```
F2 - Processing parameters.
SI          65536
SF          100.5899952 MHz
WDW          EM
SSB          0
LB          1.00 Hz
GB          0
PC          1.40
```

## SAMPLE INFORMATION

|                                          |                                        |                                        |
|------------------------------------------|----------------------------------------|----------------------------------------|
| Sample Name: JMS 115 solid               | Acquired By: Christelle                | Date Acquired: 04/10/2011 3:37:32 PM   |
| Sample Type: Unknown                     | Date Acquired: 04/10/2011 3:37:32 PM   | Acq. Method Set: RP18 LC               |
| Vial: 6                                  | Acq. Method Set: RP18 LC               | Date Processed: 05/10/2011 10:12:15 AM |
| Injection #: 1                           | Date Processed: 05/10/2011 10:12:15 AM | Processing Method: JMS 115             |
| Injection Volume: 10.00 ul               | Processing Method: JMS 115             | Channel Name: WvlnCh1                  |
| Run Time: 20.0 Minutes                   | Channel Name: WvlnCh1                  | Proc. Chnl. Descr.: PDA 262.1 nm       |
| Sample Set Name: JMS 545 JMS 137 JMS 115 | Proc. Chnl. Descr.: PDA 262.1 nm       |                                        |

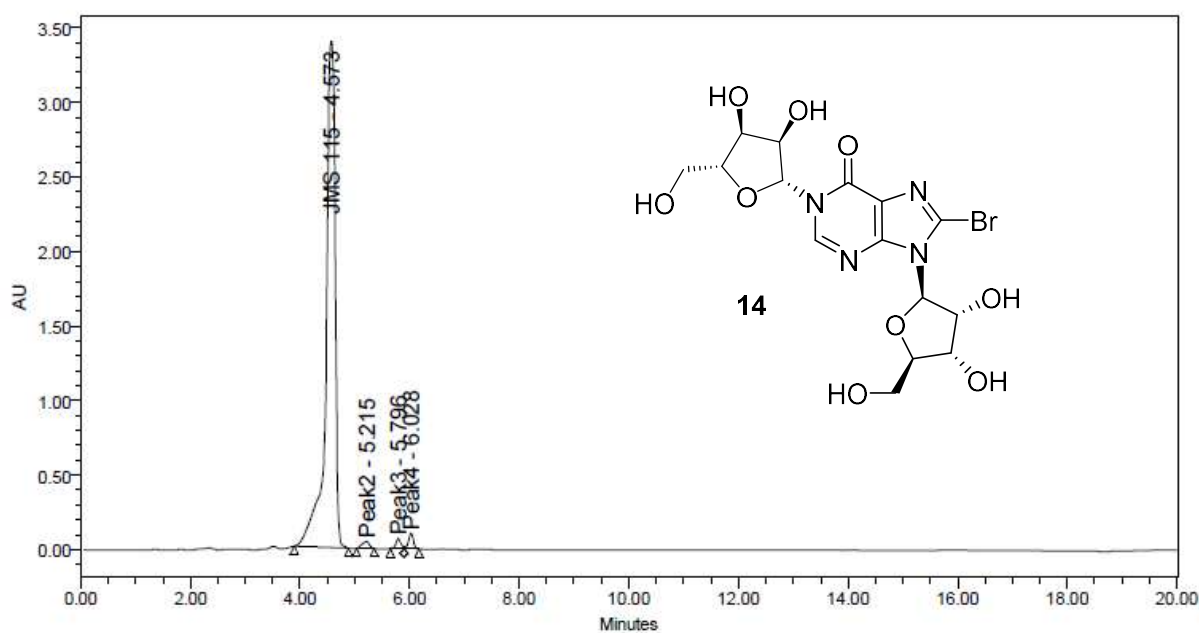

|   | Peak Name | RT    | Area     | % Area | Height  |
|---|-----------|-------|----------|--------|---------|
| 1 | JMS 115   | 4.573 | 39715120 | 96.29  | 3391937 |
| 2 | Peak2     | 5.215 | 419731   | 1.02   | 46549   |
| 3 | Peak3     | 5.796 | 442067   | 1.07   | 65376   |
| 4 | Peak4     | 6.028 | 668389   | 1.62   | 108342  |

JMS137 T15-16

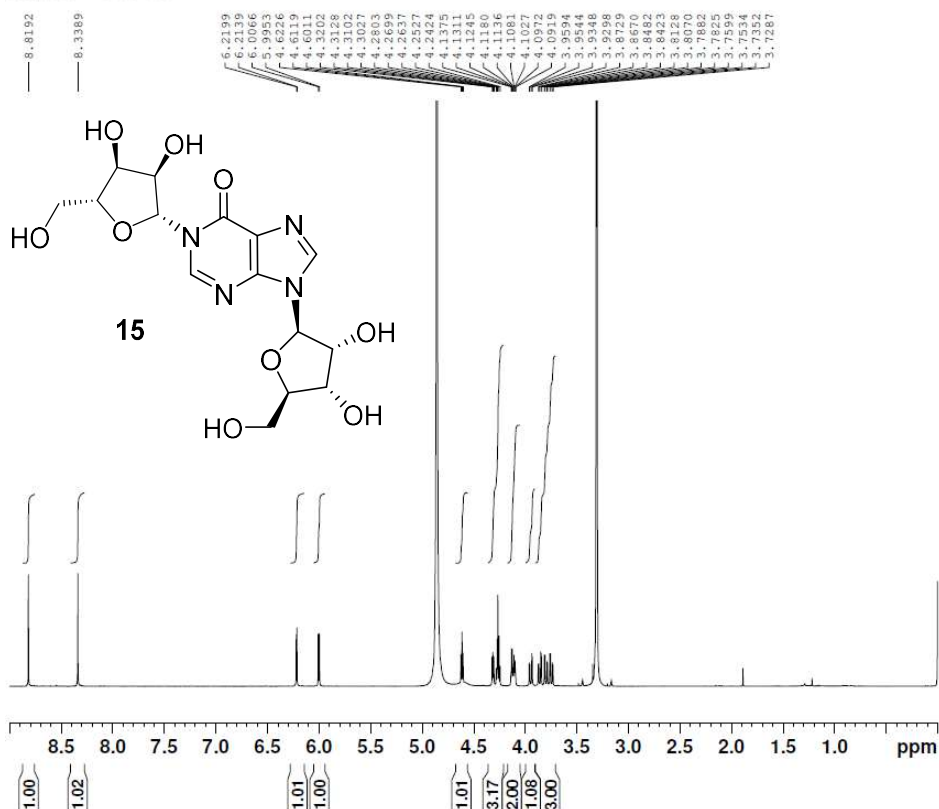

Current Data Parameters  
NAME JMS137 T15-16  
EXPNO 10  
PROCNO 1

F2 - Acquisition Parameters  
Date\_ 20111007  
Time 22.53  
INSTRUM spect  
PROBHD 5 mm PABBO BB-  
PULPROG zg30  
TD 65536  
SOLVENT MeOD  
NS 256  
DS 2  
SWH 10330.578 Hz  
FIDRES 0.157632 Hz  
AQ 3.1719425 sec  
RG 228  
DW 48.400 usec  
DE 13.94 usec  
TE 298.0 K  
D1 1.00000000 sec  
TD0 1

===== CHANNEL f1 =====  
NUC1 1H  
P1 10.30 usec  
PL1 -0.12 dB  
PL1W 19.35150909 W  
SFO1 500.1330885 MHz

F2 - Processing parameters  
SI 32768  
SF 500.1300131 MHz  
WDW EM  
SSB 0  
LB 0.30 Hz  
GB 0  
PC 1.00

JMS137 T15-16

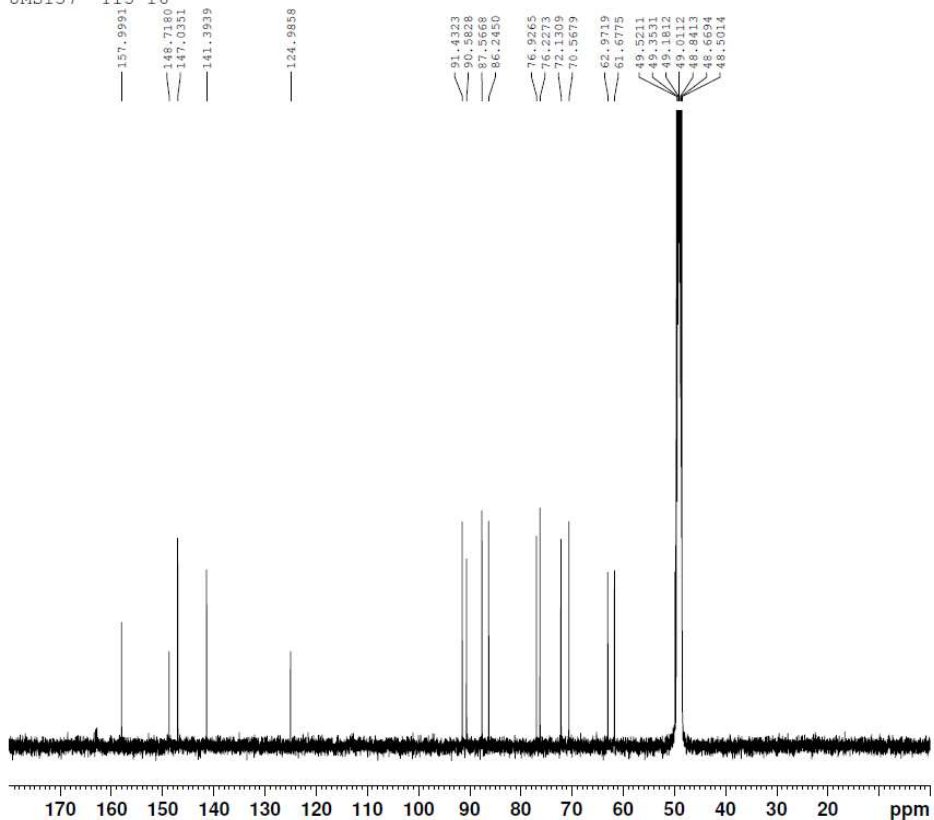

Current Data Parameters  
NAME JMS137 T15-16  
EXPNO 11  
PROCNO 1

F2 - Acquisition Parameters  
Date\_ 20111010  
Time 4.55  
INSTRUM spect  
PROBHD 5 mm PABBO BB-  
PULPROG zgpg30  
TD 65536  
SOLVENT MeOD  
NS 61440  
DS 4  
SWH 29761.904 Hz  
FIDRES 0.454131 Hz  
AQ 1.1010048 sec  
RG 2050  
DW 16.800 usec  
DE 8.43 usec  
TE 298.0 K  
D1 2.00000000 sec  
D11 0.03000000 sec  
TD0 1

===== CHANNEL f1 =====  
NUC1 13C  
P1 9.50 usec  
PL1 -0.51 dB  
PL1W 99.92730713 W  
SFO1 125.7703643 MHz

===== CHANNEL f2 =====  
CPDPRG[2] waltz16  
NUC2 1H  
PCPD2 80.00 usec  
PL2 -0.12 dB  
PL12 17.94 dB  
PL13 21.00 dB  
PL12W 19.35150909 W  
PL12W 0.30249262 W  
PL13W 0.14952536 W  
SFO2 500.1320005 MHz

F2 - Processing parameters  
SI 32768  
SF 125.7576104 MHz  
WDW EM  
SSB 0  
LB 1.00 Hz  
GB 0  
PC 1.40

## SAMPLE INFORMATION

Sample Name: JMS 137 HPLC  
 Sample Type: Unknown  
 Vial: 26  
 Injection #: 1  
 Injection Volume: 10.00 ul  
 Run Time: 20.0 Minutes  
 Sample Set Name: JMS 137 HPLC 2

Acquired By: Joanna  
 Date Acquired: 17/10/2011 3:27:24 PM  
 Acq. Method Set: RP18 LC  
 Date Processed: 17/10/2011 3:49:45 PM  
 Processing Method: JMS 137 Purified  
 Channel Name: WvlnCh1  
 Proc. Chnl. Descr.: PDA 262.1 nm

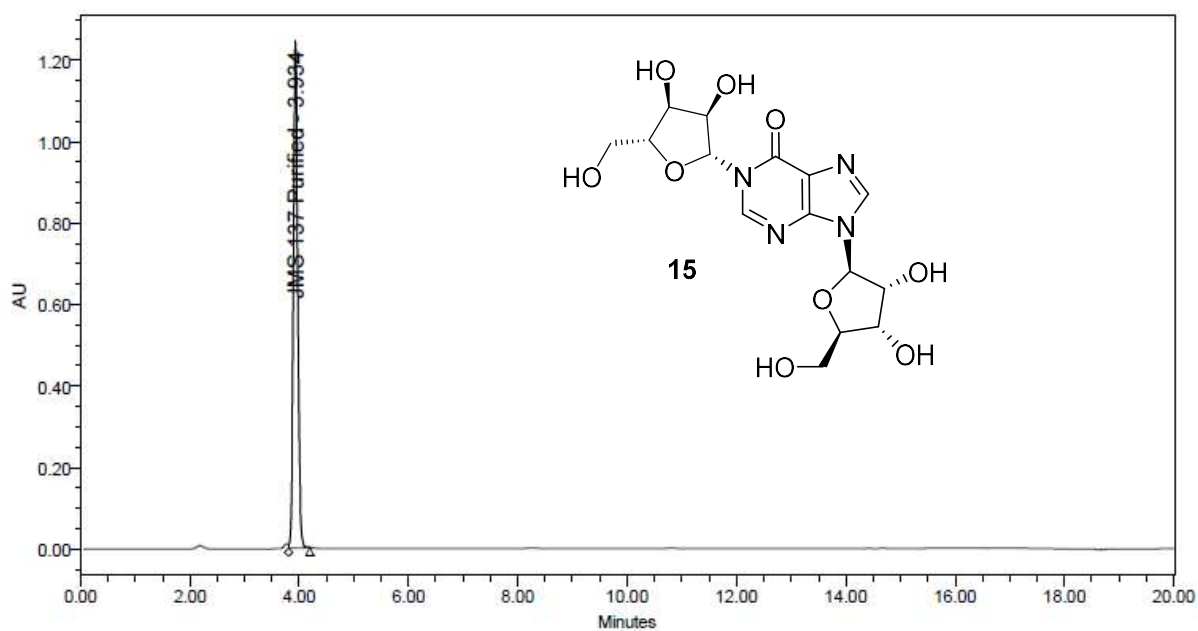

|   | Peak Name        | RT    | Area    | % Area | Height  |
|---|------------------|-------|---------|--------|---------|
| 1 | JMS 137 Purified | 3.934 | 7025028 | 100.00 | 1244149 |



## JMS 492 PRODUCT

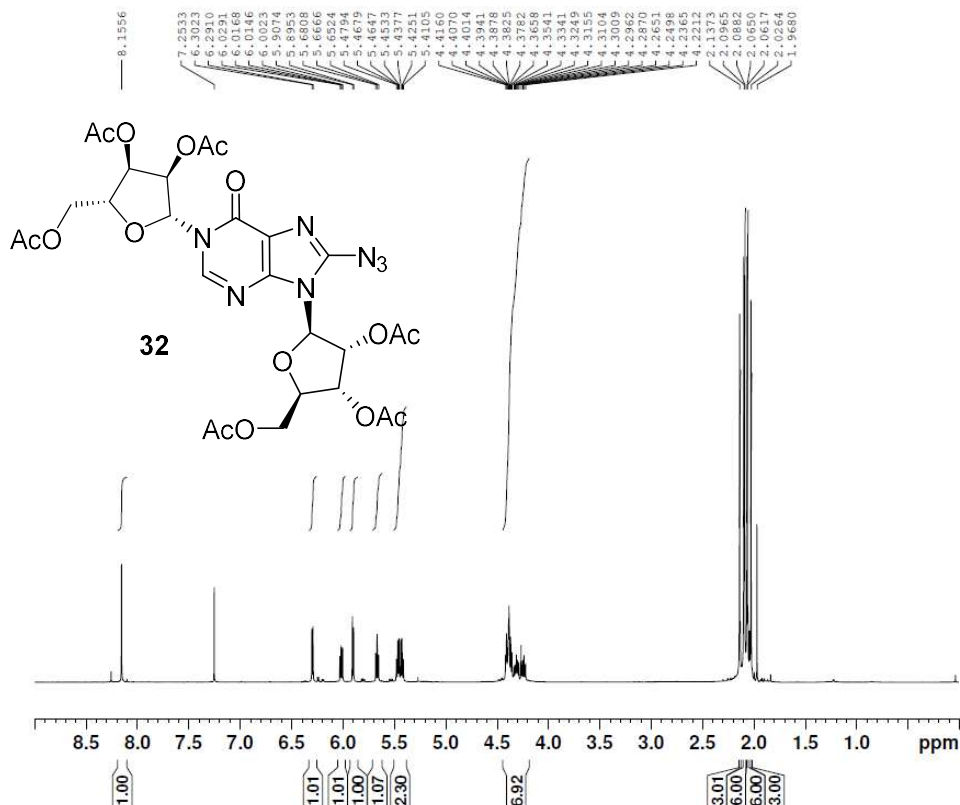

Current Data Parameters  
NAME Jul26-2011-JMS11649  
EXPNO 10  
PROCNO 1

F2 - Acquisition Parameters  
Date\_ 20110726  
Time 17.25  
INSTRUM AVIII400  
PROBHD 5 mm PABBO BB-  
PULPROG zg30  
TD 65536  
SOLVENT CDCl3  
NS 16  
DS 2  
SWH 8223.685 Hz  
FIDRES 0.125483 Hz  
AQ 3.9845889 sec  
RG 71.8  
DW 60.800 usec  
DE 17.24 usec  
TE 298.0 K  
D1 1.00000000 sec  
TD0 1

===== CHANNEL f1 =====  
NUC1 1H  
P1 13.00 usec  
PL1 0 dB  
PL1W 9.74611950 W  
SFO1 400.0424704 MHz

F2 - Processing parameters  
SI 65536  
SF 400.0399837 MHz  
WDW EM  
SSB 0  
LB 0.20 Hz  
GB 0  
PC 1.00

## JMS 492 T 18-21

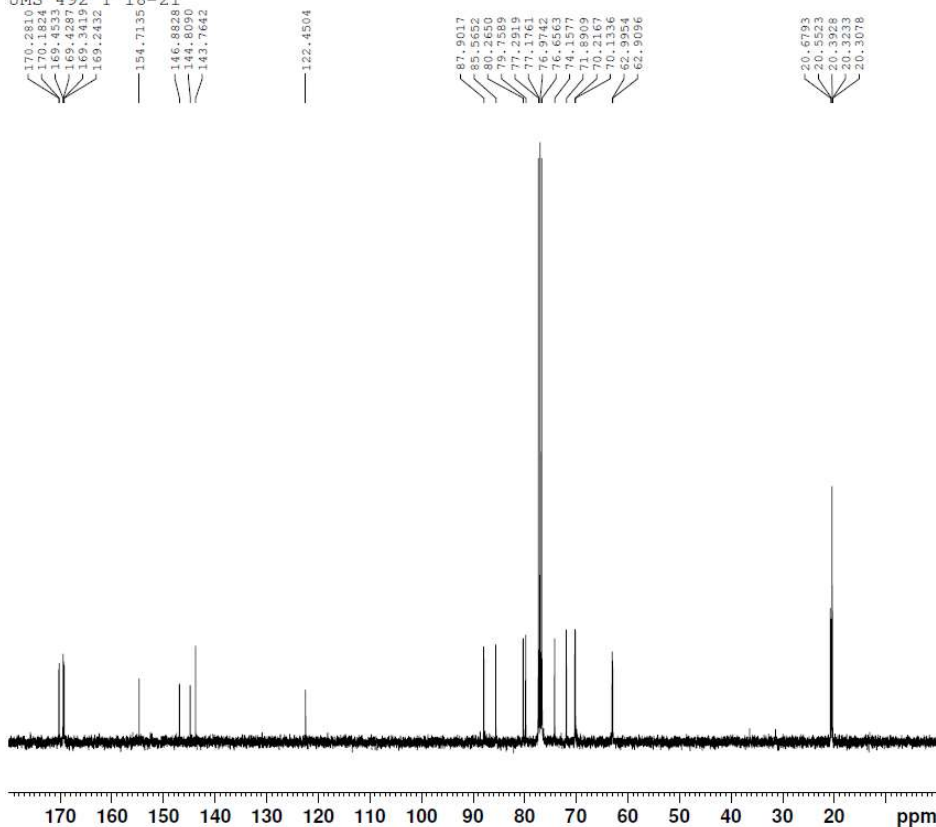

Current Data Parameters  
NAME Jul18-2011-JMS11462  
EXPNO 11  
PROCNO 1

F2 - Acquisition Parameters  
Date\_ 20110719  
Time 0.59  
INSTRUM AVIII400  
PROBHD 5 mm PABBO BB-  
PULPROG zgpg30  
TD 65536  
SOLVENT CDCl3  
NS 512  
DS 4  
SWH 24038.461 Hz  
FIDRES 0.366798 Hz  
AQ 1.3631488 sec  
RG 2050  
DW 20.800 usec  
DE 6.50 usec  
TE 298.0 K  
D1 2.00000000 sec  
D11 0.03000000 sec  
TD0 1

===== CHANNEL f1 =====  
NUC1 13C  
P1 8.75 usec  
PL1 -2.00 dB  
PL1W 58.91986084 W  
SFO1 100.6001970 MHz

===== CHANNEL f2 =====  
CPDPRG[2] waltz16  
NUC2 1H  
PCPD2 80.00 usec  
PL2 0 dB  
PL12 15.78 dB  
PL13 19.00 dB  
PL2W 9.74611950 W  
PL12W 0.25753233 W  
PL13W 0.12269637 W  
SFO2 400.0416002 MHz

F2 - Processing parameters  
SI 65536  
SF 100.5901380 MHz  
WDW EM  
SSB 0  
LB 1.00 Hz  
GB 0  
PC 1.40



JMS 510 HPLC

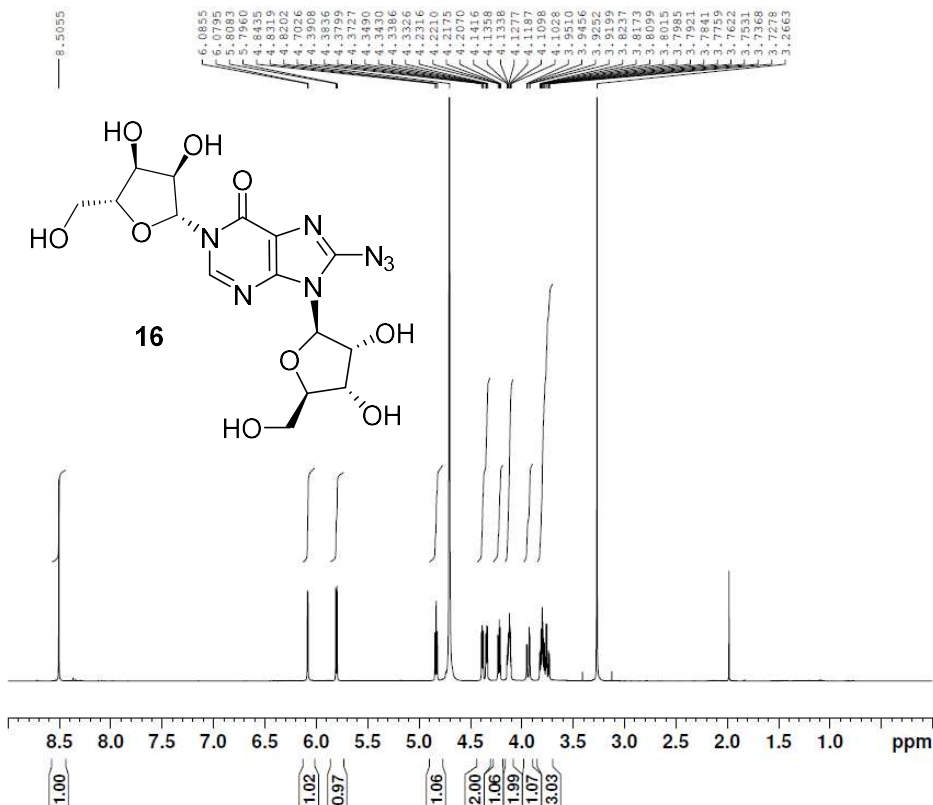

Current Data Parameters  
NAME JMS510HPLC  
EXPNO 10  
PROCNO 1

F2 - Acquisition Parameters  
Date\_ 20111019  
Time 9.17  
INSTRUM spect  
PROBHD 5 mm PABBO BB-  
PULPROG zgpg30  
TD 65536  
SOLVENT D2O  
NS 732  
DS 2  
SWH 10330.578 Hz  
FIDRES 0.157632 Hz  
AQ 3.1719425 sec  
RG 128  
DW 48.400 usec  
DE 13.94 usec  
TE 298.0 K  
D1 1.00000000 sec  
TD0 1

===== CHANNEL f1 =====  
NUC1 1H  
P1 10.30 usec  
PL1 -0.12 dB  
PL1W 19.35150909 W  
SFO1 500.1330885 MHz

F2 - Processing parameters  
SI 32768  
SF 500.1300000 MHz  
WDW EM  
SSB 0  
LB 0.30 Hz  
GB 0  
PC 1.00

JMS 510 HPLC

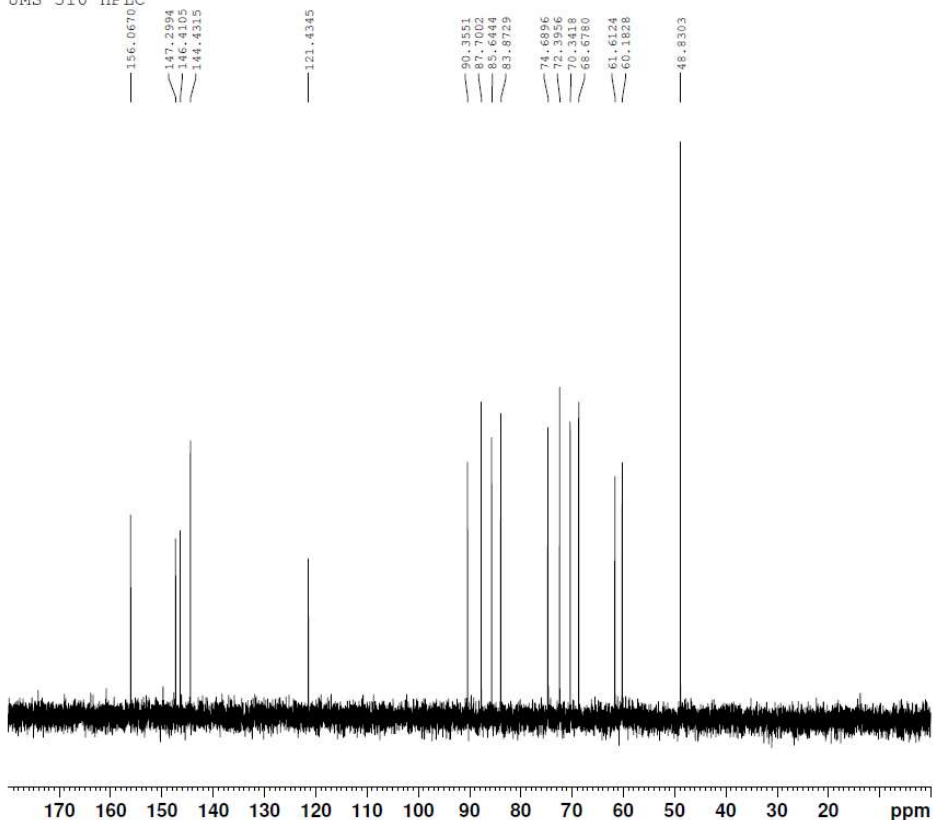

Current Data Parameters  
NAME JMS510HPLC  
EXPNO 11  
PROCNO 1

F2 - Acquisition Parameters  
Date\_ 20111019  
Time 10.10  
INSTRUM spect  
PROBHD 5 mm PABBO BB-  
PULPROG zgpg30  
TD 65536  
SOLVENT D2O  
NS 827  
DS 4  
SWH 29761.904 Hz  
FIDRES 0.454131 Hz  
AQ 1.1010048 sec  
RG 2050  
DW 16.800 usec  
DE 8.43 usec  
TE 298.2 K  
D1 2.00000000 sec  
D11 0.03000000 sec  
TD0 1

===== CHANNEL f1 =====  
NUC1 13C  
P1 9.50 usec  
PL1 -0.51 dB  
PL1W 99.92730713 W  
SFO1 125.7703643 MHz

===== CHANNEL f2 =====  
CPDPRG[2] waltz16  
NUC2 1H  
PCPD2 80.00 usec  
PL2 -0.12 dB  
PL12 17.94 dB  
PL13 21.00 dB  
PL2W 19.35150909 W  
PL12W 0.30249262 W  
PL13W 0.14952536 W  
SFO2 500.1320005 MHz

F2 - Processing parameters  
SI 32768  
SF 125.7577890 MHz  
WDW EM  
SSB 0  
LB 1.00 Hz  
GB 0  
PC 1.40

## SAMPLE INFORMATION

Sample Name: JMS 510 HPLC  
 Sample Type: Unknown  
 Vial: 1  
 Injection #: 1  
 Injection Volume: 10.00 ul  
 Run Time: 20.0 Minutes  
 Sample Set Name: JMS 510 HPLC

Acquired By: Christelle  
 Date Acquired: 25/10/2011 5:14:47 PM  
 Acq. Method Set: RP18 LC  
 Date Processed: 28/10/2011 12:20:44 PM  
 Processing Method: JMS 510 HPLC  
 Channel Name: WvlnCh1  
 Proc. Chnl. Descr.: PDA 262.1 nm

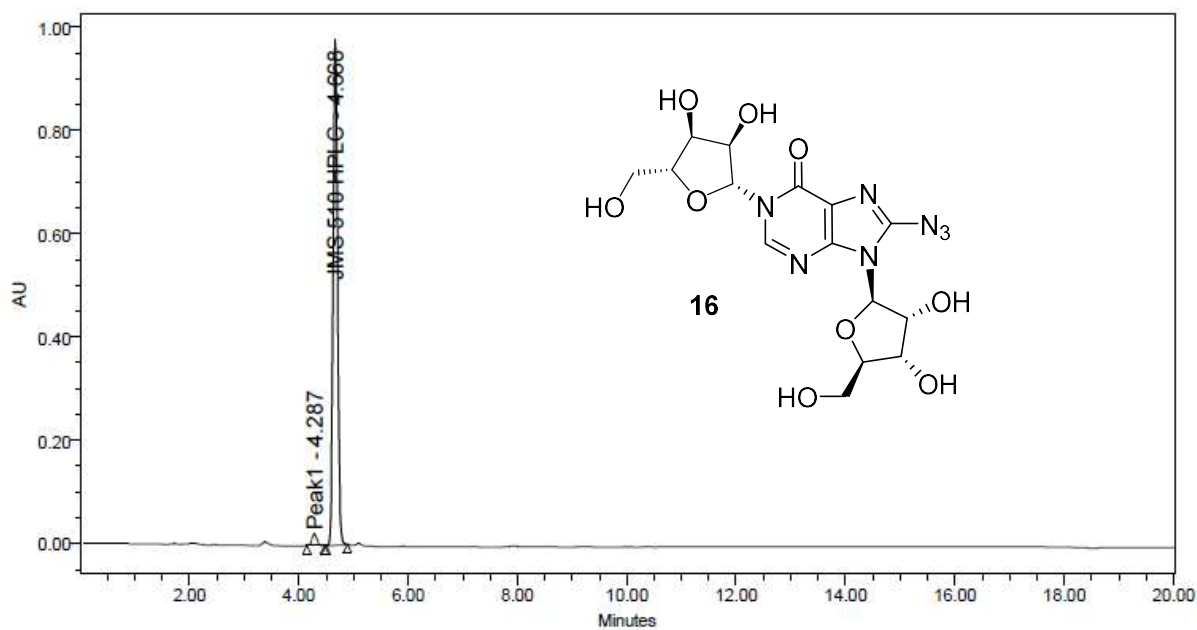

|   | Peak Name    | RT    | Area    | % Area | Height |
|---|--------------|-------|---------|--------|--------|
| 1 | Peak1        | 4.287 | 143472  | 2.55   | 23047  |
| 2 | JMS 510 HPLC | 4.668 | 5486409 | 97.45  | 979291 |

JMS 503 T 4

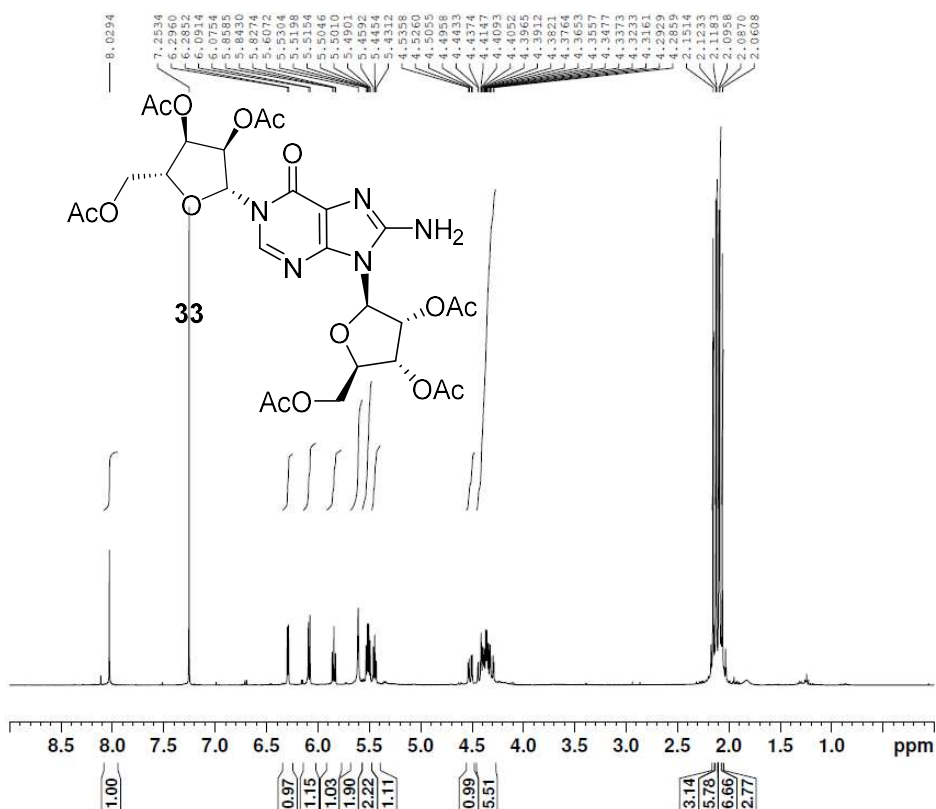

Current Data Parameters  
 NAME Jul26-2011-JMS11651  
 EXPNO 10  
 PROCNO 1

F2 - Acquisition Parameters  
 Date\_ 20110726  
 Time 17.15  
 INSTRUM AVII1400  
 PROBHD 5 mm PABBO BB-  
 PULPROG zg30  
 TD 65536  
 SOLVENT CDCl3  
 NS 16  
 DS 2  
 SWH 8223.685 Hz  
 FIDRES 0.125483 Hz  
 AQ 3.9845889 sec  
 RG 144  
 DW 60.800 usec  
 DE 17.24 usec  
 TE 298.0 K  
 D1 1.00000000 sec  
 TD0 1

===== CHANNEL f1 =====  
 NUC1 1H  
 P1 13.00 usec  
 PL1 0 dB  
 PL1W 9.74611950 W  
 SFO1 400.0424704 MHz  
 F2 - Processing parameters  
 SI 65536  
 SF 400.0399837 MHz  
 WDW EM  
 SSB 0  
 LB 0.20 Hz  
 GB 0  
 PC 1.00

JMS 503 T 4

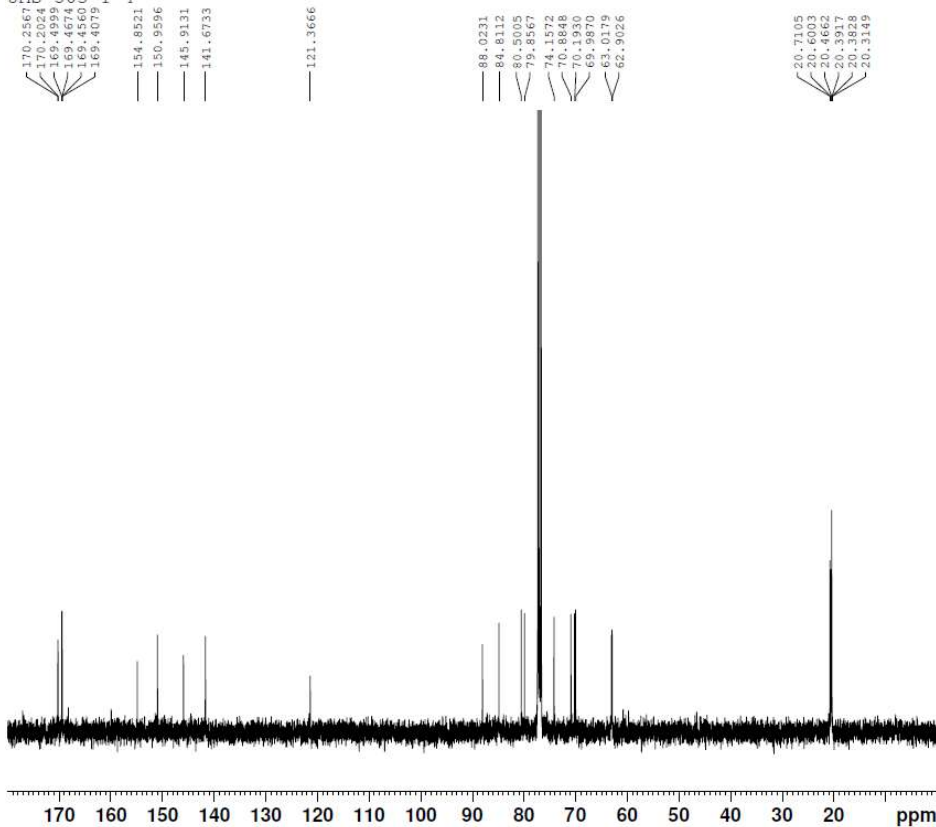

Current Data Parameters  
 NAME Jul26-2011-JMS11651  
 EXPNO 14  
 PROCNO 1

F2 - Acquisition Parameters  
 Date\_ 20110726  
 Time 19.43  
 INSTRUM AVII1400  
 PROBHD 5 mm PABBO BB-  
 PULPROG zgpg30  
 TD 65536  
 SOLVENT CDCl3  
 NS 512  
 DS 4  
 SWH 24038.461 Hz  
 FIDRES 0.366798 Hz  
 AQ 1.3631488 sec  
 RG 2050  
 DW 20.800 usec  
 DE 6.50 usec  
 TE 298.0 K  
 D1 2.00000000 sec  
 D11 0.03000000 sec  
 TD0 1

===== CHANNEL f1 =====  
 NUC1 13C  
 P1 8.75 usec  
 PL1 -2.00 dB  
 PL1W 58.91986084 W  
 SFO1 100.6001970 MHz

===== CHANNEL f2 =====  
 CPDPRG2 waltz16  
 NUC2 1H  
 PCPD2 80.00 usec  
 PL2 0 dB  
 PL12 15.78 dB  
 PL13 19.00 dB  
 PL2W 9.74611950 W  
 PL12W 0.25753233 W  
 PL13W 0.12269637 W  
 SFO2 400.0416002 MHz

F2 - Processing parameters  
 SI 65536  
 SF 100.5901380 MHz  
 WDW EM  
 SSB 0  
 LB 1.00 Hz  
 GB 0  
 PC 1.40

JMS 509 T 9-11

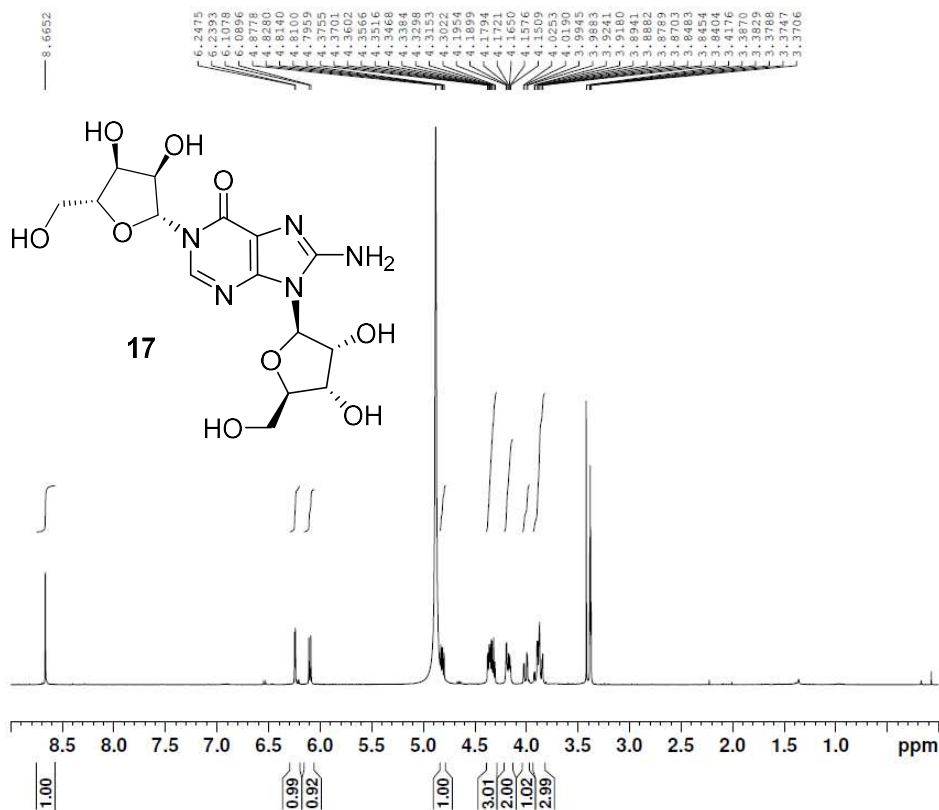

Current Data Parameters  
 NAME Aug08-2011-JMS11943  
 EXPNO 10  
 PROCNO 1

F2 - Acquisition Parameters  
 Date\_ 20110808  
 Time 16.58  
 INSTRUM AVIII400  
 PROBHD 5 mm PABBO BB-  
 PULPROG zg30  
 TD 65536  
 SOLVENT MeOD  
 NS 16  
 DS 2  
 SWH 8223.685 Hz  
 FIDRES 0.125483 Hz  
 AQ 3.9845889 sec  
 RG 161  
 DW 60.800 usec  
 DE 17.24 usec  
 TE 298.0 K  
 D1 1.00000000 sec  
 TD0 1

===== CHANNEL f1 =====  
 NUC1 1H  
 P1 13.00 usec  
 PL1 0 dB  
 PL1W 9.74611950 W  
 SFO1 400.0424704 MHz

F2 - Processing parameters  
 SI 65536  
 SF 400.0399837 MHz  
 WDW EM  
 SSB 0  
 LB 0.20 Hz  
 GB 0  
 PC 1.00

JMS 509 T 9-11

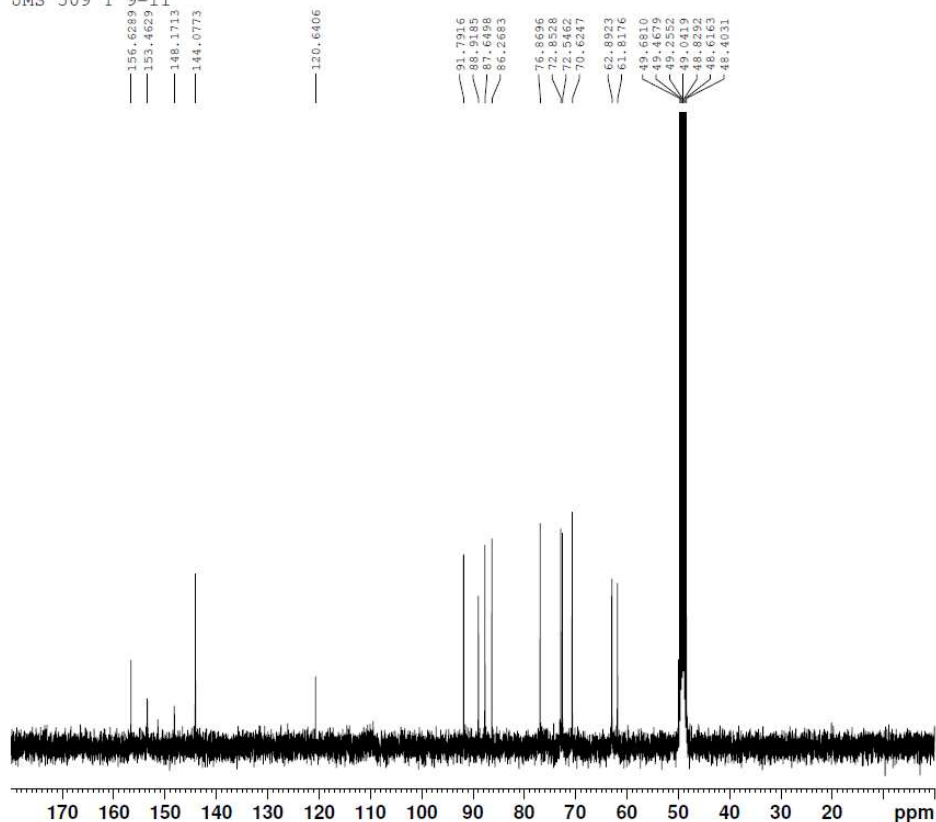

Current Data Parameters  
 NAME Aug08-2011-JMS11943  
 EXPNO 11  
 PROCNO 1

F2 - Acquisition Parameters  
 Date\_ 20110809  
 Time 5.47  
 INSTRUM AVIII400  
 PROBHD 5 mm PABBO BB-  
 PULPROG zgpg30  
 TD 65536  
 SOLVENT MeOD  
 NS 1024  
 DS 4  
 SWH 24038.461 Hz  
 FIDRES 0.366798 Hz  
 AQ 1.3631488 sec  
 RG 2050  
 DW 20.800 usec  
 DE 6.50 usec  
 TE 298.0 K  
 D1 2.00000000 sec  
 D11 0.03000000 sec  
 TD0 1

===== CHANNEL f1 =====  
 NUC1 13C  
 P1 8.75 usec  
 PL1 -2.00 dB  
 PL1W 58.91986084 W  
 SFO1 100.6001970 MHz

===== CHANNEL f2 =====  
 CPDPRG2 waltz16  
 NUC2 1H  
 PCPD2 80.00 usec  
 PL2 0 dB  
 PL12 15.78 dB  
 PL13 19.00 dB  
 PL2W 9.74611950 W  
 PL12W 0.25753233 W  
 PL13W 0.12269637 W  
 SFO2 400.0416002 MHz

F2 - Processing parameters  
 SI 65536  
 SF 100.5899952 MHz  
 WDW EM  
 SSB 0  
 LB 1.00 Hz  
 GB 0  
 PC 1.40

## SAMPLE INFORMATION

Sample Name: JMS 509  
 Sample Type: Unknown  
 Vial: 31  
 Injection #: 1  
 Injection Volume: 10.00 ul  
 Run Time: 20.0 Minutes  
 Sample Set Name: JMS 509 510 519 533

Acquired By: Joanna  
 Date Acquired: 17/08/2011 3:48:55 PM  
 Acq. Method Set: RP18 LC  
 Date Processed: 18/08/2011 5:45:27 PM  
 Processing Method: JMS 509  
 Channel Name: WvInCh1  
 Proc. Chnl. Descr.: PDA 262.1 nm

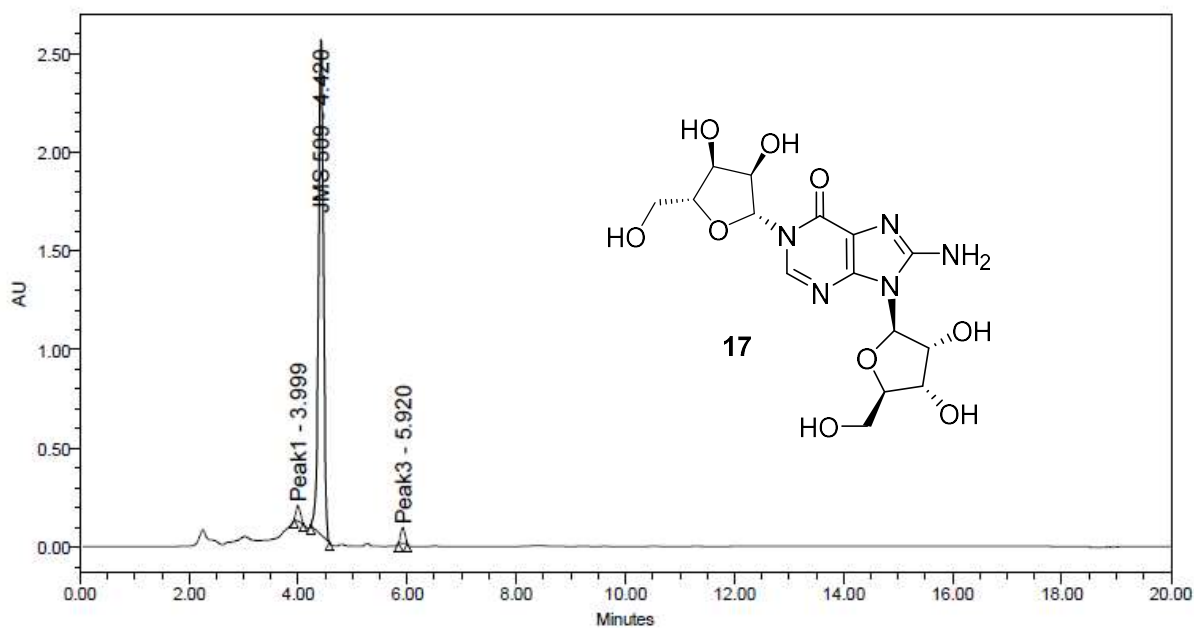

|   | Peak Name | RT    | Area     | % Area | Height  |
|---|-----------|-------|----------|--------|---------|
| 1 | Peak1     | 3.999 | 428563   | 2.53   | 77203   |
| 2 | JMS 509   | 4.420 | 16065701 | 95.02  | 2513493 |
| 3 | Peak3     | 5.920 | 413227   | 2.44   | 80736   |

# Total synthesis of N9-(4-hydroxybutyl)-N1-Inosine analogues (18-21)

JMS 523 T 10-12

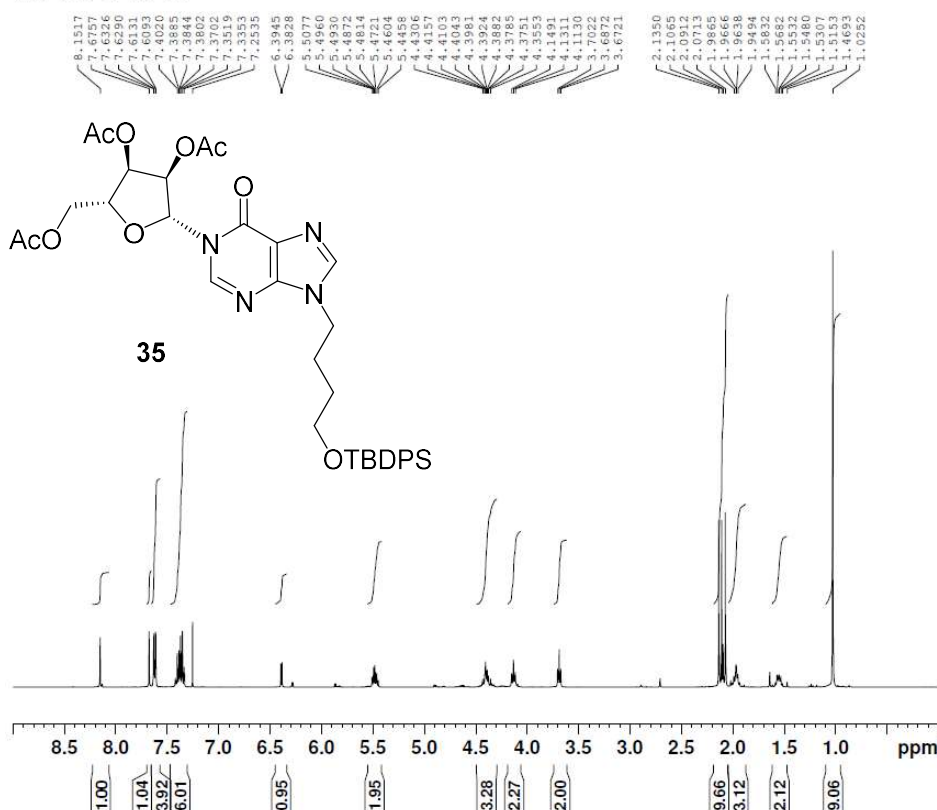

Current Data Parameters  
NAME Aug08-2011-JMS11944  
EXPNO 10  
PROCNO 1

F2 - Acquisition Parameters  
Date\_ 20110808  
Time 17.04  
INSTRUM AVI1400  
PROBHD 5 mm PABBO BB-  
PULPROG zg30  
TD 65536  
SOLVENT CDCl3  
NS 16  
DS 2  
SWH 8223.685 Hz  
FIDRES 0.125483 Hz  
AQ 3.9845889 sec  
RG 57  
DW 60.800 usec  
DE 17.24 usec  
TE 298.0 K  
D1 1.00000000 sec  
TD0 1

===== CHANNEL f1 =====  
NUC1 1H  
P1 13.00 usec  
PL1 0 dB  
PL1W 9.74611950 W  
SFO1 400.0424704 MHz

F2 - Processing parameters  
SI 65536  
SF 400.0399837 MHz  
WDW EM  
SSB 0  
LB 0.20 Hz  
GB 0  
PC 1.00

JMS 523 T 10-12

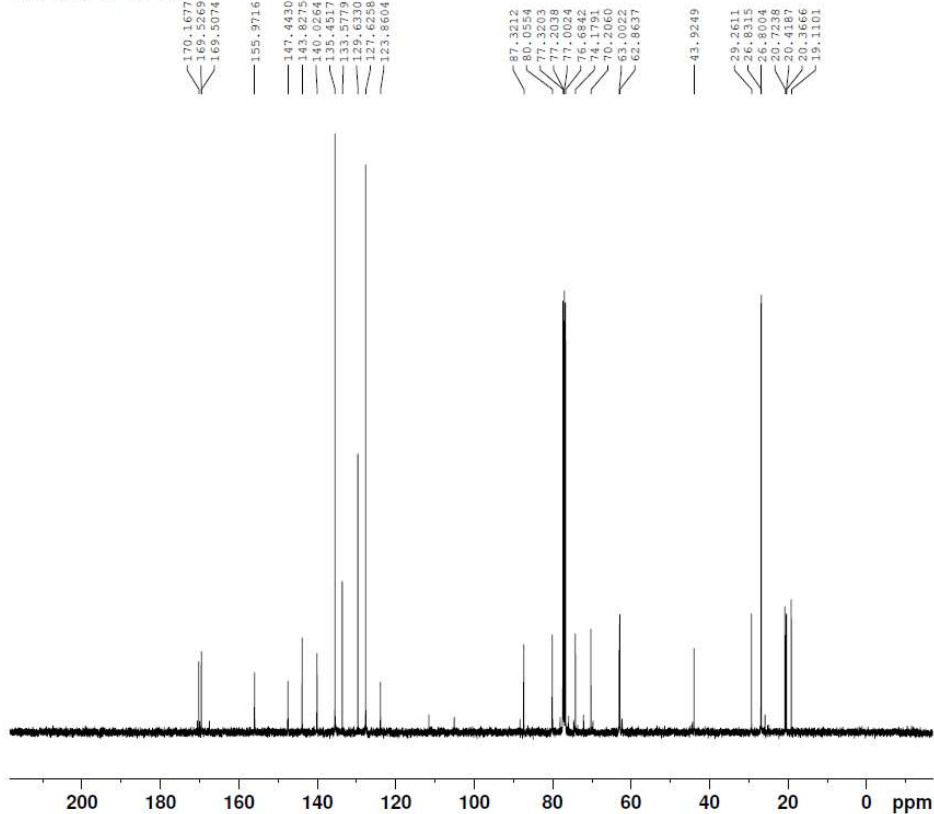

Current Data Parameters  
NAME Aug08-2011-JMS11944  
EXPNO 14  
PROCNO 1

F2 - Acquisition Parameters  
Date\_ 20110809  
Time 6.21  
INSTRUM AVI1400  
PROBHD 5 mm PABBO BB-  
PULPROG zgpg30  
TD 65536  
SOLVENT CDCl3  
NS 512  
DS 4  
SWH 24038.461 Hz  
FIDRES 0.366798 Hz  
AQ 1.3631488 sec  
RG 2050  
DW 20.800 usec  
DE 6.50 usec  
TE 298.0 K  
D1 2.00000000 sec  
D11 0.03000000 sec  
TD0 1

===== CHANNEL f1 =====  
NUC1 13C  
P1 8.75 usec  
PL1 -2.00 dB  
PL1W 58.91986084 W  
SFO1 100.6001970 MHz

===== CHANNEL f2 =====  
CPDPRG2 waltz16  
NUC2 1H  
PCPD2 80.00 usec  
PL2 0 dB  
PL12 15.78 dB  
PL13 19.00 dB  
PL2W 9.74611950 W  
PL12W 0.25753233 W  
PL13W 0.12269637 W  
SFO2 400.0416002 MHz

F2 - Processing parameters  
SI 65536  
SF 100.5901380 MHz  
WDW EM  
SSB 0  
LB 1.00 Hz  
GB 0  
PC 1.40



JMS 529 (2) T 36-38

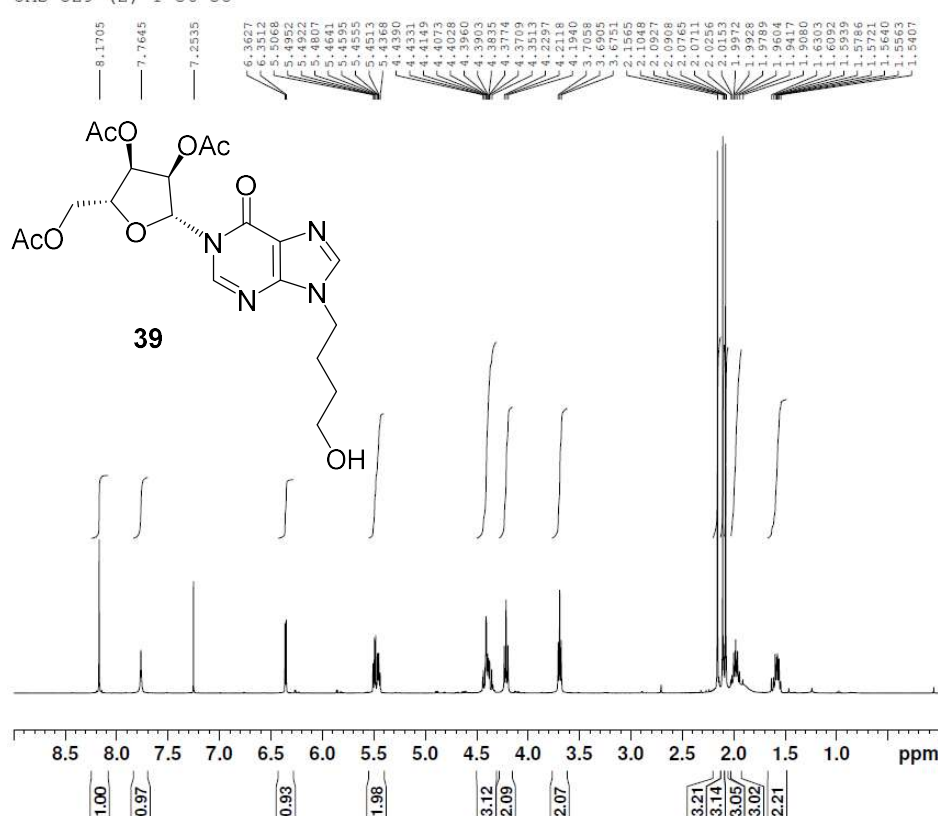

Current Data Parameters  
 NAME Sep28-2011-JMS12570  
 EXPNO 10  
 PROCNO 1

F2 - Acquisition Parameters  
 Date\_ 20110928  
 Time 18.29  
 INSTRUM AVIII400  
 PROBHD 5 mm PABBO BB-  
 PULPROG zg30  
 TD 65536  
 SOLVENT CDCl3  
 NS 16  
 DS 2  
 SWH 8223.685 Hz  
 FIDRES 0.125483 Hz  
 AQ 3.9845889 sec  
 RG 161  
 DW 60.800 usec  
 DE 17.24 usec  
 TE 298.0 K  
 D1 1.00000000 sec  
 TDO 1

===== CHANNEL f1 =====  
 NUC1 1H  
 P1 13.00 usec  
 PL1 0 dB  
 PL1W 9.74611950 W  
 SFO1 400.0424704 MHz

F2 - Processing parameters  
 SI 65536  
 SF 400.0399837 MHz  
 WDW EM  
 SSB 0  
 LB 0.20 Hz  
 GB 0  
 PC 1.00

JMS529 (2) T36-38

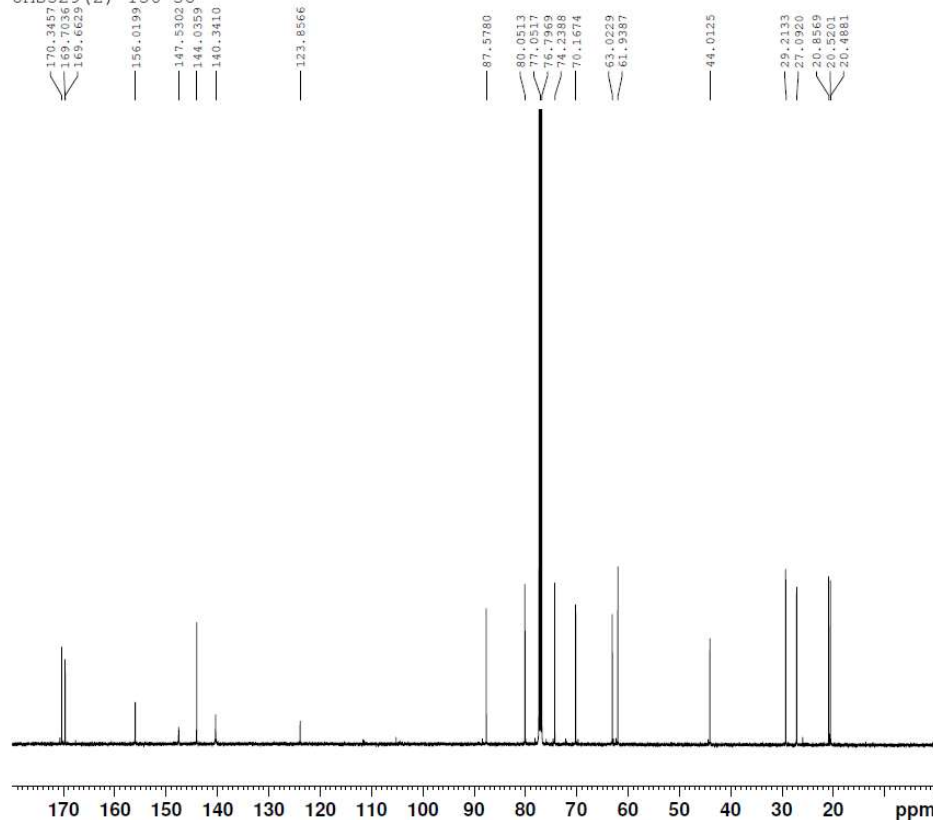

Current Data Parameters  
 NAME JMS529-2 T36-38  
 EXPNO 10  
 PROCNO 1

F2 - Acquisition Parameters  
 Date\_ 20110929  
 Time 12.43  
 INSTRUM spect  
 PROBHD 5 mm PABBO BB-  
 PULPROG zgpg30  
 TD 65536  
 SOLVENT CDCl3  
 NS 3850  
 DS 4  
 SWH 29761.904 Hz  
 FIDRES 0.454131 Hz  
 AQ 1.1010048 sec  
 RG 2050  
 DW 16.800 usec  
 DE 8.43 usec  
 TE 298.1 K  
 D1 2.00000000 sec  
 D11 0.03000000 sec  
 TDO 1

===== CHANNEL f1 =====  
 NUC1 13C  
 P1 9.50 usec  
 PL1 -0.51 dB  
 PL1W 99.92730713 W  
 SFO1 125.7703643 MHz

===== CHANNEL f2 =====  
 CPDPRG2 waltz16  
 NUC2 1H  
 PCPD2 80.00 usec  
 PL2 -0.12 dB  
 PL12 17.94 dB  
 PL13 21.00 dB  
 PL12W 19.35150909 W  
 PL12W 0.30249262 W  
 PL13W 0.14952536 W  
 SFO2 500.1320005 MHz

F2 - Processing parameters  
 SI 32768  
 SF 125.7577890 MHz  
 WDW EM  
 SSB 0  
 LB 1.00 Hz  
 GB 0  
 PC 1.40



JMS 545 HPLC

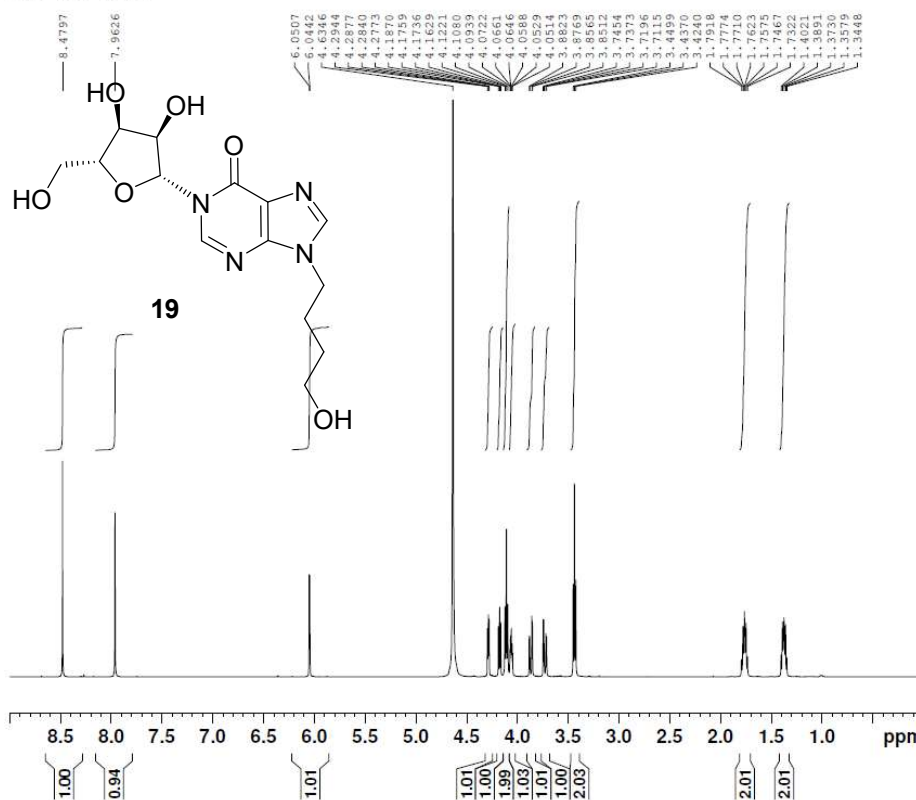

Current Data Parameters  
 NAME Oct24-2011-JMS545HPLC  
 EXPNO 10  
 PROCNO 1

F2 - Acquisition Parameters  
 Date\_ 20111024  
 Time 19.16  
 INSTRUM spect  
 PROBHD 5 mm PABBO BB-  
 PULPROG zg30  
 TD 65536  
 SOLVENT D2O  
 NS 1600  
 DS 2  
 SWH 10330.578 Hz  
 FIDRES 0.157632 Hz  
 AQ 3.1719425 sec  
 RG 128  
 DW 48.400 usec  
 DE 13.94 usec  
 TE 297.9 K  
 D1 1.00000000 sec  
 TD0 1

===== CHANNEL f1 =====  
 NUC1 1H  
 P1 10.30 usec  
 PL1 -0.12 dB  
 PL1W 19.35150909 W  
 SFO1 500.1330885 MHz

F2 - Processing parameters  
 SI 32768  
 SF 500.1300345 MHz  
 WDW EM  
 SSB 0  
 LB 0.3 Hz  
 GB 0  
 PC 1.00

JMS 545 HPLC

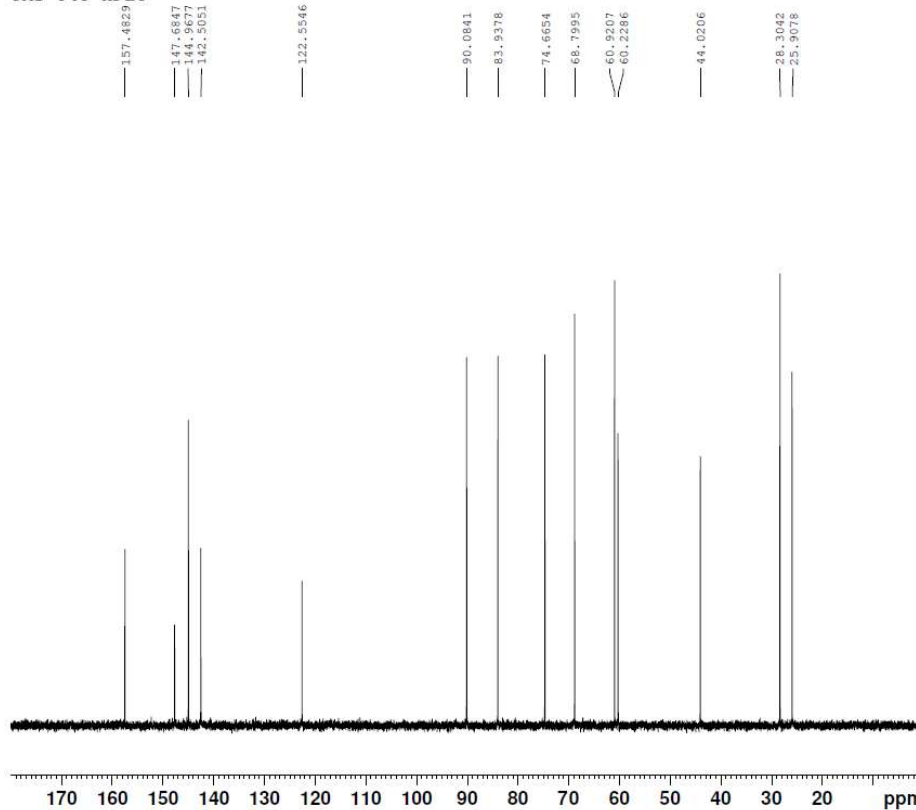

Current Data Parameters  
 NAME Oct24-2011-JMS545HPLC  
 EXPNO 11  
 PROCNO 1

F2 - Acquisition Parameters  
 Date\_ 20111025  
 Time 6.10  
 INSTRUM spect  
 PROBHD 5 mm PABBO BB-  
 PULPROG zgpg30  
 TD 65536  
 SOLVENT D2O  
 NS 10240  
 DS 4  
 SWH 29761.904 Hz  
 FIDRES 0.454131 Hz  
 AQ 1.1010048 sec  
 RG 2050  
 DW 16.800 usec  
 DE 8.43 usec  
 TE 298.0 K  
 D1 2.00000000 sec  
 D11 0.03000000 sec  
 TD0 1

===== CHANNEL f1 =====  
 NUC1 13C  
 P1 9.50 usec  
 PL1 -0.51 dB  
 PL1W 99.92730713 W  
 SFO1 125.7703643 MHz

===== CHANNEL f2 =====  
 CPDPRG[2] waltz16  
 NUC2 1H  
 PCPD2 80.00 usec  
 PL2 -0.12 dB  
 PL12 17.94 dB  
 PL13 21.00 dB  
 PL2W 19.35150909 W  
 PL12W 0.30249262 W  
 PL13W 0.14952536 W  
 SFO2 500.1320005 MHz

F2 - Processing parameters  
 SI 32768  
 SF 125.7577890 MHz  
 WDW EM  
 SSB 0  
 LB 1.00 Hz  
 GB 0  
 PC 1.40

## SAMPLE INFORMATION

Sample Name: JMS 545 HPLC  
 Sample Type: Unknown  
 Vial: 3  
 Injection #: 1  
 Injection Volume: 10.00 ul  
 Run Time: 20.0 Minutes  
 Sample Set Name: JMS 510 533 545 HPLC

Acquired By: Christelle  
 Date Acquired: 25/10/2011 4:45:44 PM  
 Acq. Method Set: RP18 LC  
 Date Processed: 28/10/2011 12:25:15 PM  
 Processing Method: JMS 545 HPLC  
 Channel Name: WvInCh1  
 Proc. Chnl. Descr.: PDA 262.1 nm

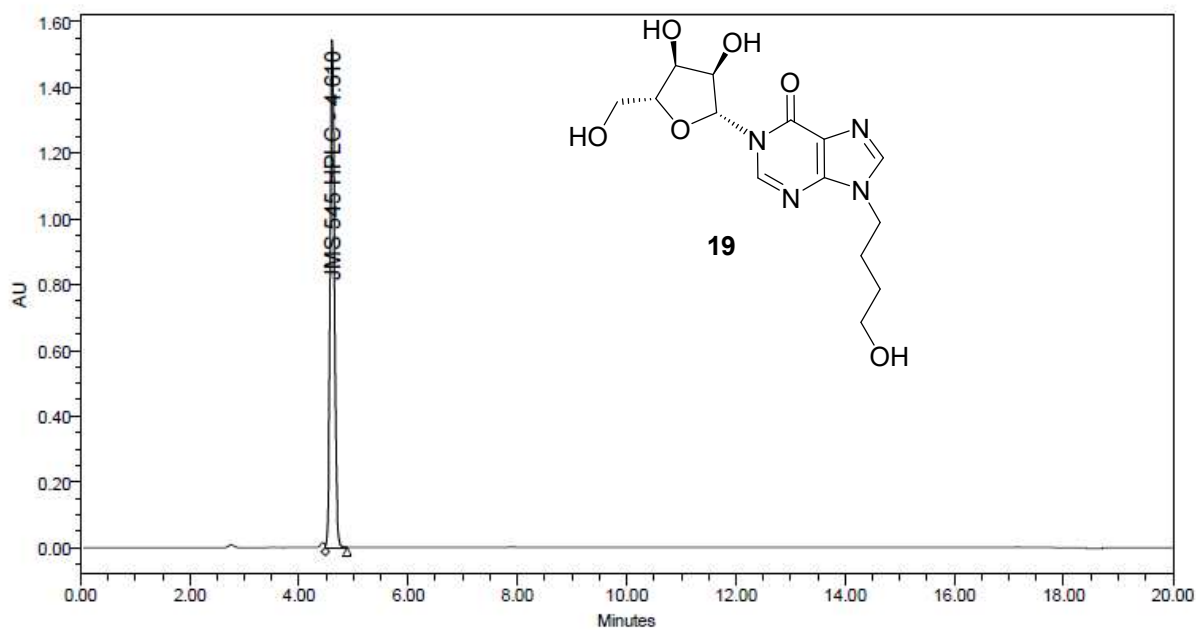

|   | Peak Name    | RT    | Area    | % Area | Height  |
|---|--------------|-------|---------|--------|---------|
| 1 | JMS 545 HPLC | 4.610 | 8540932 | 100.00 | 1541489 |

JMS 522 T 8-10

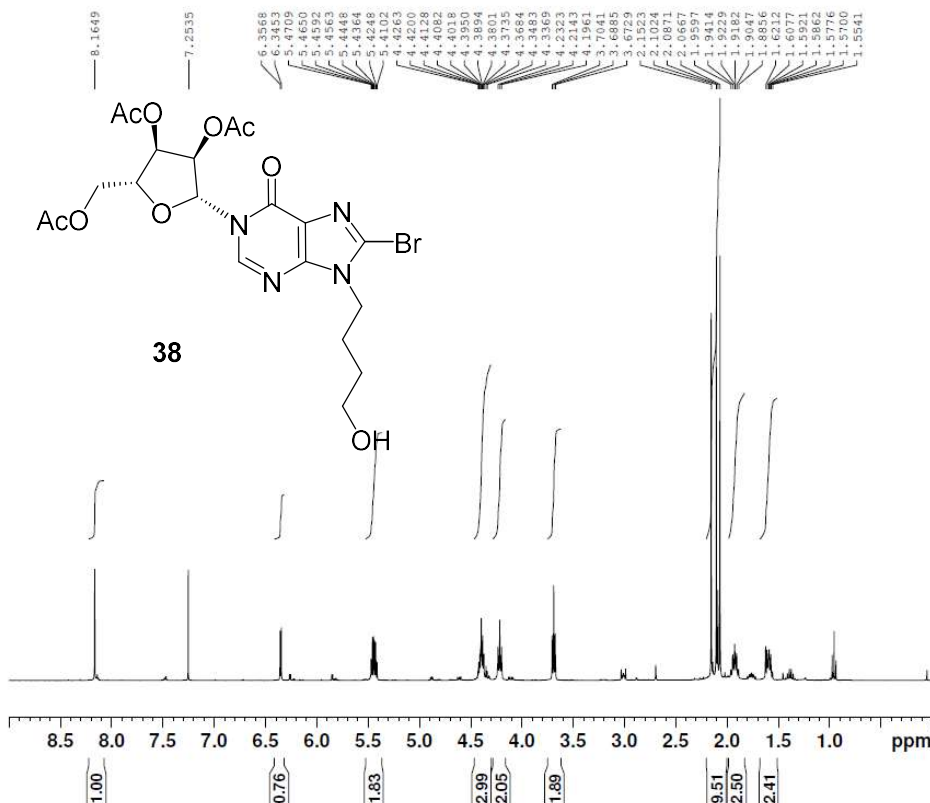

Current Data Parameters  
 NAME Aug08-2011-JMS11949  
 EXPNO 10  
 PROCNO 1

F2 - Acquisition Parameters  
 Date\_ 20110809  
 Time 7.03  
 INSTRUM AVII400  
 PROBHD 5 mm PABBO BB-  
 PULPROG zg30  
 TD 65536  
 SOLVENT CDCl3  
 NS 16  
 DS 2  
 SWH 8223.685 Hz  
 FIDRES 0.125483 Hz  
 AQ 3.9845889 sec  
 RG 128  
 DW 60.800 usec  
 DE 17.24 usec  
 TE 298.0 K  
 D1 1.00000000 sec  
 TD0 1

===== CHANNEL f1 =====  
 NUC1 1H  
 P1 13.00 usec  
 PL1 0 dB  
 PL1W 9.74611950 W  
 SFO1 400.0424704 MHz

F2 - Processing parameters  
 SI 65536  
 SF 400.0399837 MHz  
 WDW EM  
 SSB 0  
 LB 0.20 Hz  
 GB 0  
 PC 1.00

JMS 422 T 8-10

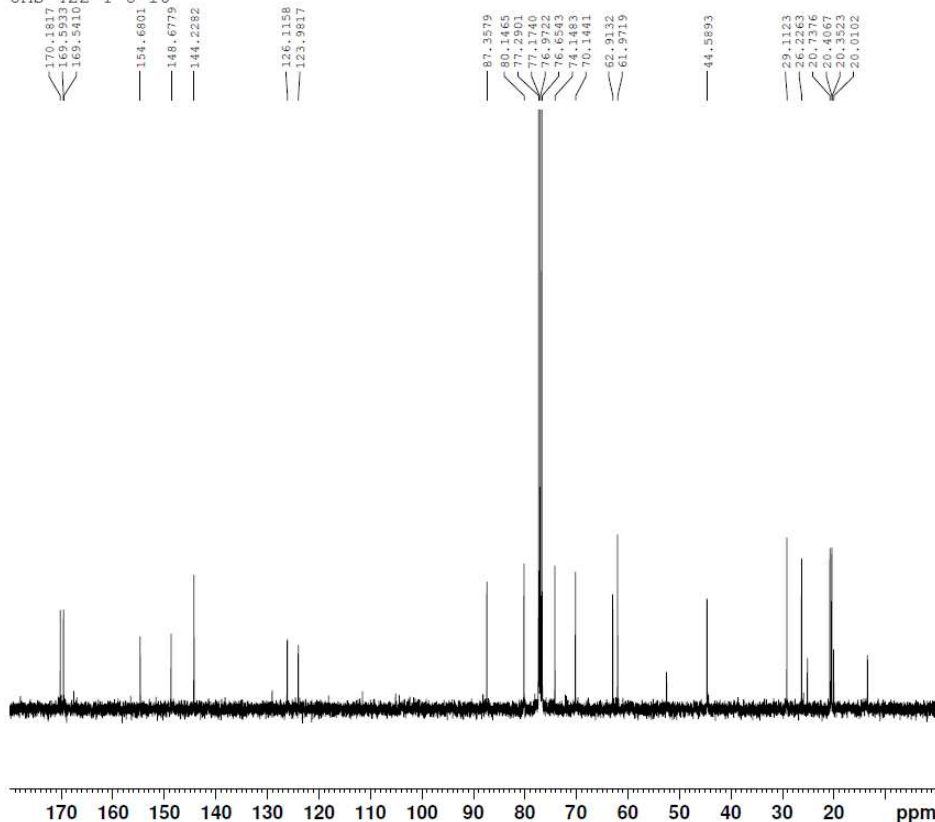

Current Data Parameters  
 NAME Aug08-2011-JMS11949  
 EXPNO 14  
 PROCNO 1

F2 - Acquisition Parameters  
 Date\_ 20110809  
 Time 19.35  
 INSTRUM AVII400  
 PROBHD 5 mm PABBO BB-  
 PULPROG zgpg30  
 TD 65536  
 SOLVENT CDCl3  
 NS 512  
 DS 4  
 SWH 24038.461 Hz  
 FIDRES 0.366798 Hz  
 AQ 1.3631488 sec  
 RG 2050  
 DW 20.800 usec  
 DE 6.50 usec  
 TE 298.0 K  
 D1 2.00000000 sec  
 D11 0.03000000 sec  
 TD0 1

===== CHANNEL f1 =====  
 NUC1 13C  
 P1 8.75 usec  
 PL1 -2.00 dB  
 PL1W 58.91986084 W  
 SFO1 100.6001970 MHz

===== CHANNEL f2 =====  
 CPDPRG2 waltz16  
 NUC2 1H  
 PCPD2 80.00 usec  
 PL2 0 dB  
 PL12 15.78 dB  
 PL13 19.00 dB  
 PL2W 9.74611950 W  
 PL12W 0.25753233 W  
 PL13W 0.12269637 W  
 SFO2 400.0416002 MHz

F2 - Processing parameters  
 SI 65536  
 SF 100.5901380 MHz  
 WDW EM  
 SSB 0  
 LB 1.00 Hz  
 GB 0  
 PC 1.40

JMS 532 T 7-9

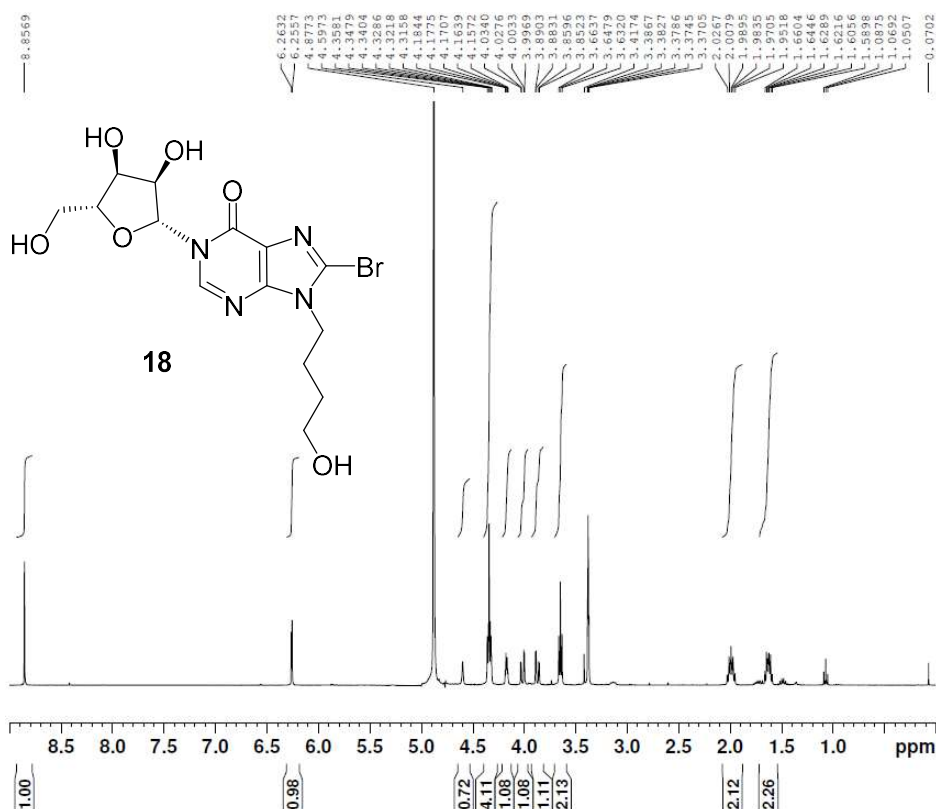

Current Data Parameters  
 NAME Aug12-2011-JMS10255  
 EXPNO 10  
 PROCNO 1

F2 - Acquisition Parameters  
 Date\_ 20110812  
 Time 16.55  
 INSTRUM AVII1400  
 PROBHD 5 mm PABBO BB-  
 PULPROG zg30  
 TD 65536  
 SOLVENT MeOD  
 NS 16  
 DS 2  
 SWH 8223.685 Hz  
 FIDRES 0.125483 Hz  
 AQ 3.9845889 sec  
 RG 161  
 DW 60.800 usec  
 DE 17.24 usec  
 TE 298.0 K  
 D1 1.00000000 sec  
 TD0 1

===== CHANNEL f1 =====  
 NUC1 1H  
 P1 13.00 usec  
 PL1 0 dB  
 PL1W 9.74611950 W  
 SFO1 400.0424704 MHz

F2 - Processing parameters  
 SI 65536  
 SF 400.0399837 MHz  
 WDW EM  
 SSB 0  
 LB 0.20 Hz  
 GB 0  
 PC 1.00

JMS 532 T 7-9

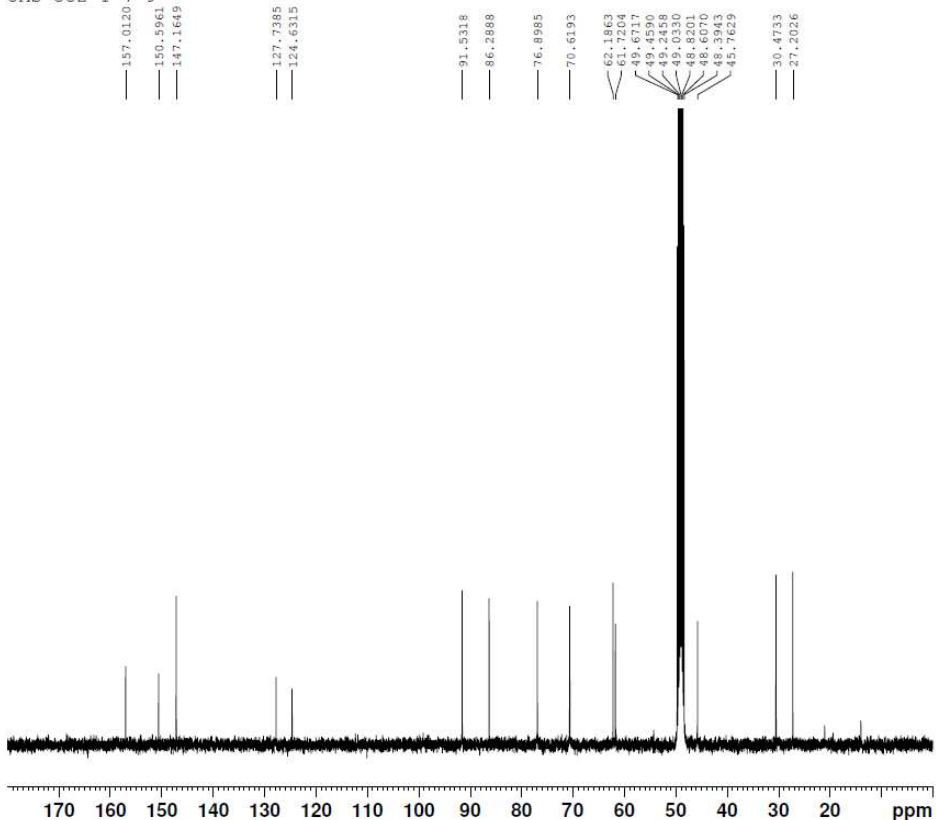

Current Data Parameters  
 NAME Aug12-2011-JMS10255  
 EXPNO 12  
 PROCNO 1

F2 - Acquisition Parameters  
 Date\_ 20110813  
 Time 2.24  
 INSTRUM AVII1400  
 PROBHD 5 mm PABBO BB-  
 PULPROG zgpg30  
 TD 65536  
 SOLVENT MeOD  
 NS 2048  
 DS 4  
 SWH 24038.461 Hz  
 FIDRES 0.366798 Hz  
 AQ 1.3631488 sec  
 RG 1820  
 DW 20.800 usec  
 DE 6.50 usec  
 TE 298.0 K  
 D1 2.00000000 sec  
 D11 0.03000000 sec  
 TD0 1

===== CHANNEL f1 =====  
 NUC1 13C  
 P1 8.75 usec  
 PL1 -2.00 dB  
 PL1W 58.91986084 W  
 SFO1 100.6001970 MHz

===== CHANNEL f2 =====  
 CPDPRG2 waltz16  
 NUC2 1H  
 PCPD2 80.00 usec  
 PL2 0 dB  
 PL12 15.78 dB  
 PL13 19.00 dB  
 PL1W 9.74611950 W  
 PL12W 0.25753233 W  
 PL13W 0.12269637 W  
 SFO2 400.0416002 MHz

F2 - Processing parameters  
 SI 65536  
 SF 100.5899952 MHz  
 WDW EM  
 SSB 0  
 LB 1.00 Hz  
 GB 0  
 PC 1.40

## SAMPLE INFORMATION

Sample Name: JMS 532  
 Sample Type: Unknown  
 Vial: 34  
 Injection #: 1  
 Injection Volume: 10.00 ul  
 Run Time: 20.0 Minutes  
 Sample Set Name: JMS 509 510 519 532 533

Acquired By: Joanna  
 Date Acquired: 18/08/2011 1:33:24 PM  
 Acq. Method Set: RP18 LC  
 Date Processed: 18/08/2011 5:00:47 PM  
 Processing Method: JMS 532  
 Channel Name: WvlnCh1  
 Proc. Chnl. Descr.: PDA 262.1 nm

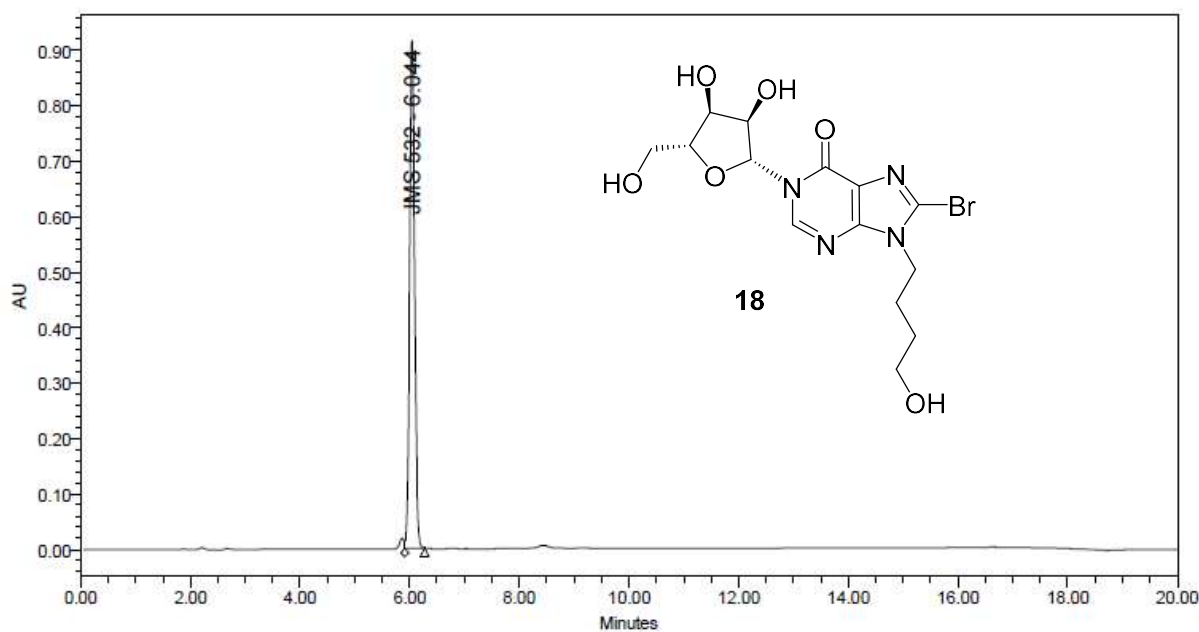

|   | Peak Name | RT    | Area    | % Area | Height |
|---|-----------|-------|---------|--------|--------|
| 1 | JMS 532   | 6.044 | 5950121 | 100.00 | 917702 |

JMS 496 T 13-14

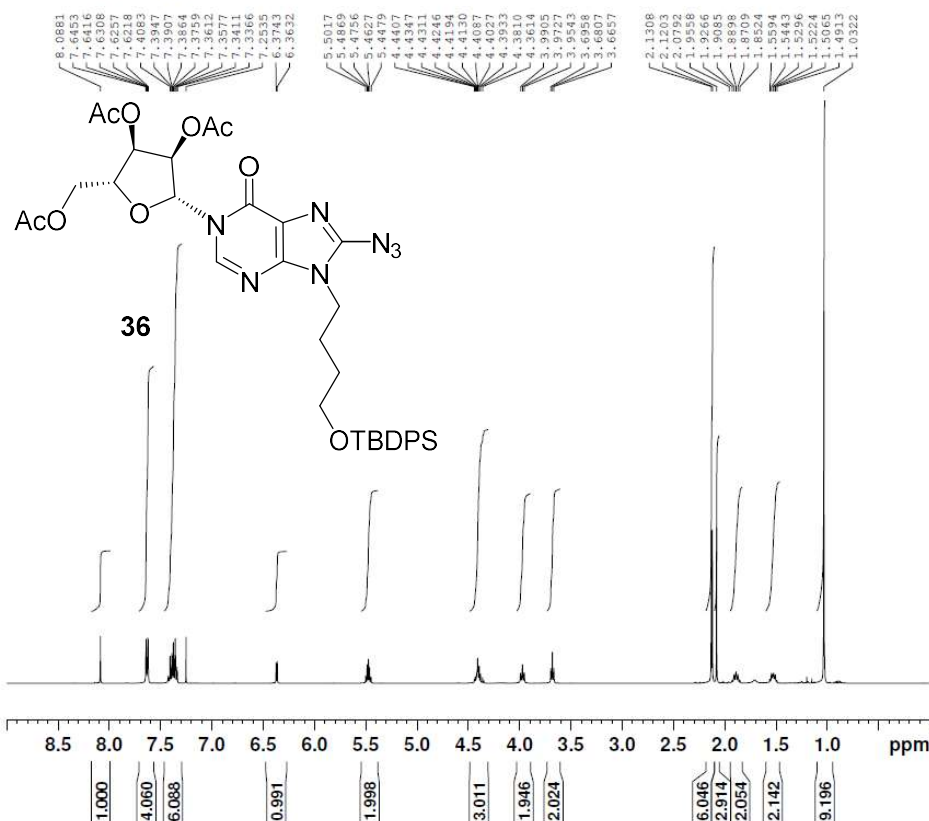

Current Data Parameters  
 NAME Aug03-2011-JMS11846  
 EXPNO 10  
 PROCNO 1

F2 - Acquisition Parameters  
 Date\_ 20110803  
 Time 15.08  
 INSTRUM AVIII400  
 PROBHD 5 mm PABBO BB-  
 PULPROG zg30  
 TD 65536  
 SOLVENT CDCl3  
 NS 16  
 DS 2  
 SWH 8223.685 Hz  
 FIDRES 0.125483 Hz  
 AQ 3.9845889 sec  
 RG 101  
 DW 60.800 usec  
 DE 17.24 usec  
 TE 298.0 K  
 D1 1.00000000 sec  
 TDO 1

===== CHANNEL f1 =====  
 NUC1 1H  
 P1 13.00 usec  
 PL1 0 dB  
 PL1W 9.74611950 W  
 SFO1 400.0424704 MHz

F2 - Processing parameters  
 SI 65536  
 SF 400.0399837 MHz  
 WDW EM  
 SSB 0  
 LB 0.20 Hz  
 GB 0  
 PC 1.00

JMS 496 T 13-14

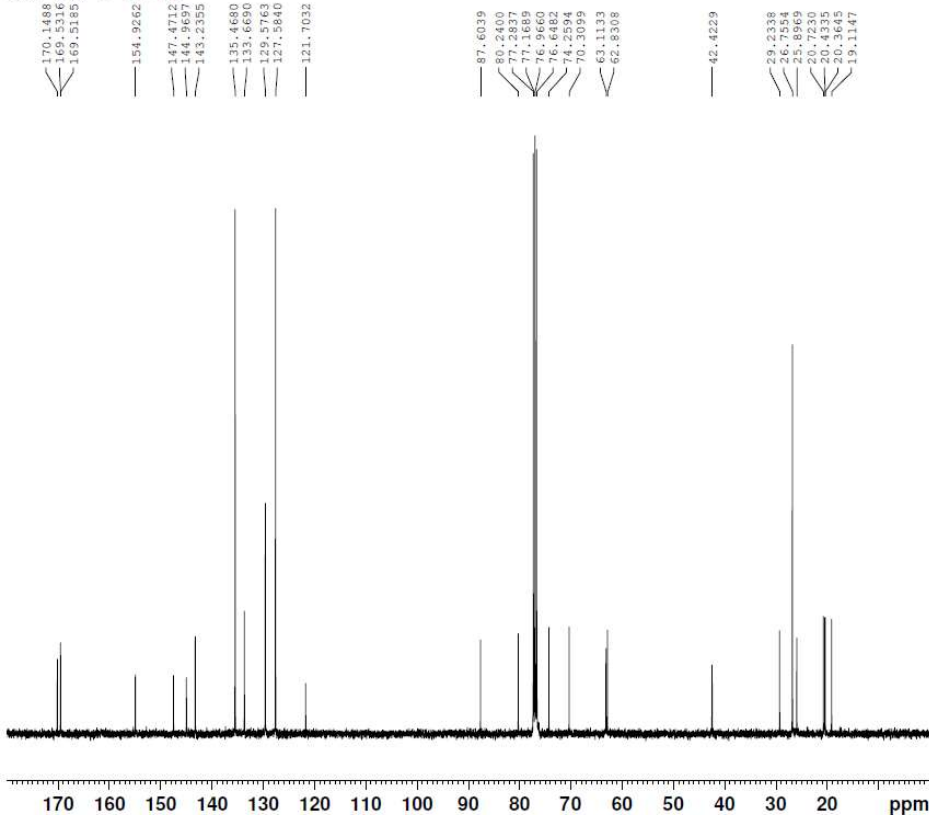

Current Data Parameters  
 NAME Aug03-2011-JMS11846  
 EXPNO 11  
 PROCNO 1

F2 - Acquisition Parameters  
 Date\_ 20110803  
 Time 22.35  
 INSTRUM AVIII400  
 PROBHD 5 mm PABBO BB-  
 PULPROG zgpg30  
 TD 65536  
 SOLVENT CDCl3  
 NS 1024  
 DS 4  
 SWH 24038.461 Hz  
 FIDRES 0.366798 Hz  
 AQ 1.3631488 sec  
 RG 2050  
 DW 20.800 usec  
 DE 6.50 usec  
 TE 298.0 K  
 D1 2.00000000 sec  
 D11 0.03000000 sec  
 TDO 1

===== CHANNEL f1 =====  
 NUC1 13C  
 P1 8.75 usec  
 PL1 -2.00 dB  
 PL1W 58.91986084 W  
 SFO1 100.6001970 MHz

===== CHANNEL f2 =====  
 CPDPRG2 waltz16  
 NUC2 1H  
 PCPD2 80.00 usec  
 PL2 0 dB  
 PL12 15.78 dB  
 PL13 19.00 dB  
 PL2W 9.74611950 W  
 PL12W 0.25753233 W  
 PL13W 0.12269637 W  
 SFO2 400.0416002 MHz

F2 - Processing parameters  
 SI 65536  
 SF 100.5901380 MHz  
 WDW EM  
 SSB 0  
 LB 1.00 Hz  
 GB 0  
 PC 1.40



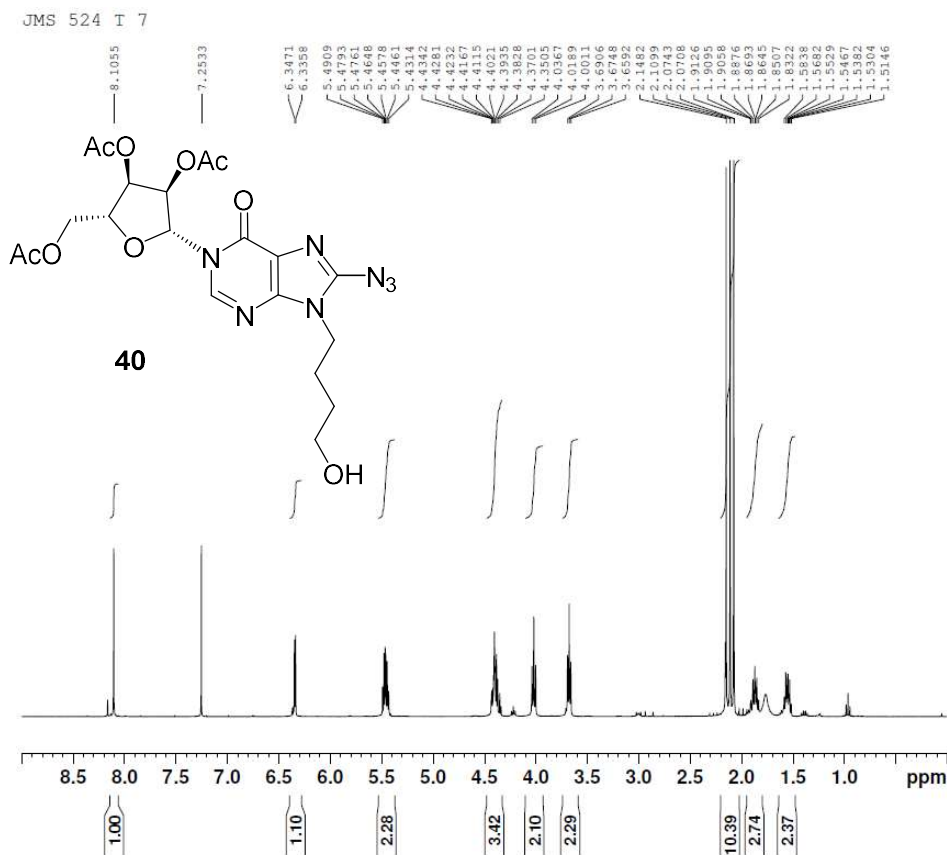

Current Data Parameters  
NAME Aug08-2011-JMS11950  
EXPNO 10  
PROCNO 1

F2 - Acquisition Parameters  
Date\_ 20110809  
Time 7.46  
INSTRUM AVII1400  
PROBHD 5 mm PABBO BB-  
PULPROG zg30  
TD 65536  
SOLVENT CDC13  
NS 16  
DS 2  
SWH 8223.685 Hz  
FIDRES 0.125483 Hz  
AQ 3.9845889 sec  
RG 161  
DW 60.800 usec  
DE 17.24 usec  
TE 298.0 K  
D1 1.00000000 sec  
TD0 1

===== CHANNEL f1 =====  
NUC1 1H  
P1 13.00 usec  
PL1 0 dB  
PL1W 9.74611950 W  
SFO1 400.0424704 MHz

F2 - Processing parameters  
SI 65536  
SF 400.0399837 MHz  
WDW EM  
SSB 0  
LB 0.20 Hz  
GB 0  
PC 1.00

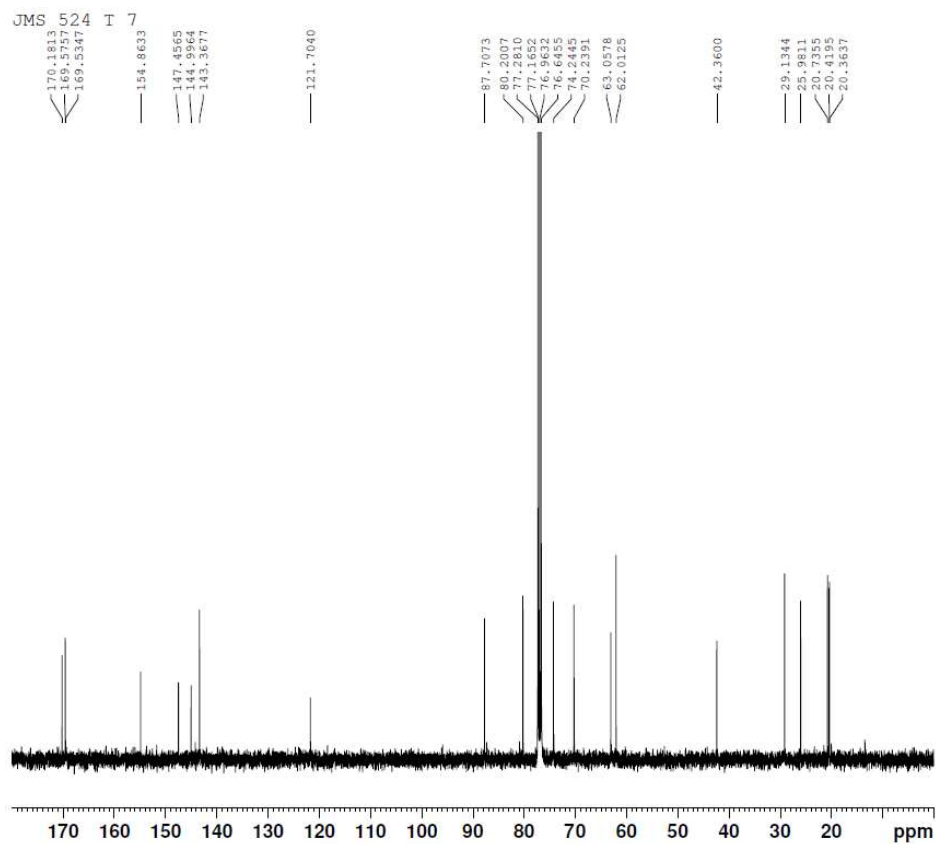

Current Data Parameters  
NAME Aug08-2011-JMS11950  
EXPNO 14  
PROCNO 1

F2 - Acquisition Parameters  
Date\_ 20110809  
Time 20.44  
INSTRUM AVII1400  
PROBHD 5 mm PABBO BB-  
PULPROG zgpg30  
TD 65536  
SOLVENT CDC13  
NS 512  
DS 4  
SWH 24038.461 Hz  
FIDRES 0.366798 Hz  
AQ 1.3631488 sec  
RG 2050  
DW 20.800 usec  
DE 6.50 usec  
TE 298.0 K  
D1 2.00000000 sec  
D11 0.03000000 sec  
TD0 1

===== CHANNEL f1 =====  
NUC1 13C  
P1 9.75 usec  
PL1 -2.00 dB  
PL1W 58.91986084 W  
SFO1 100.6001970 MHz

===== CHANNEL f2 =====  
CPDPRG[2] waltz16  
NUC2 1H  
PCPD2 80.00 usec  
PL2 0 dB  
PL12 15.78 dB  
PL13 19.00 dB  
PL2W 9.74611950 W  
PL12W 0.25753233 W  
PL13W 0.12269637 W  
SFO2 400.0416002 MHz

F2 - Processing parameters  
SI 65536  
SF 100.5901380 MHz  
WDW EM  
SSB 0  
LB 1.00 Hz  
GB 0  
PC 1.40



JMS 533 T 6-8

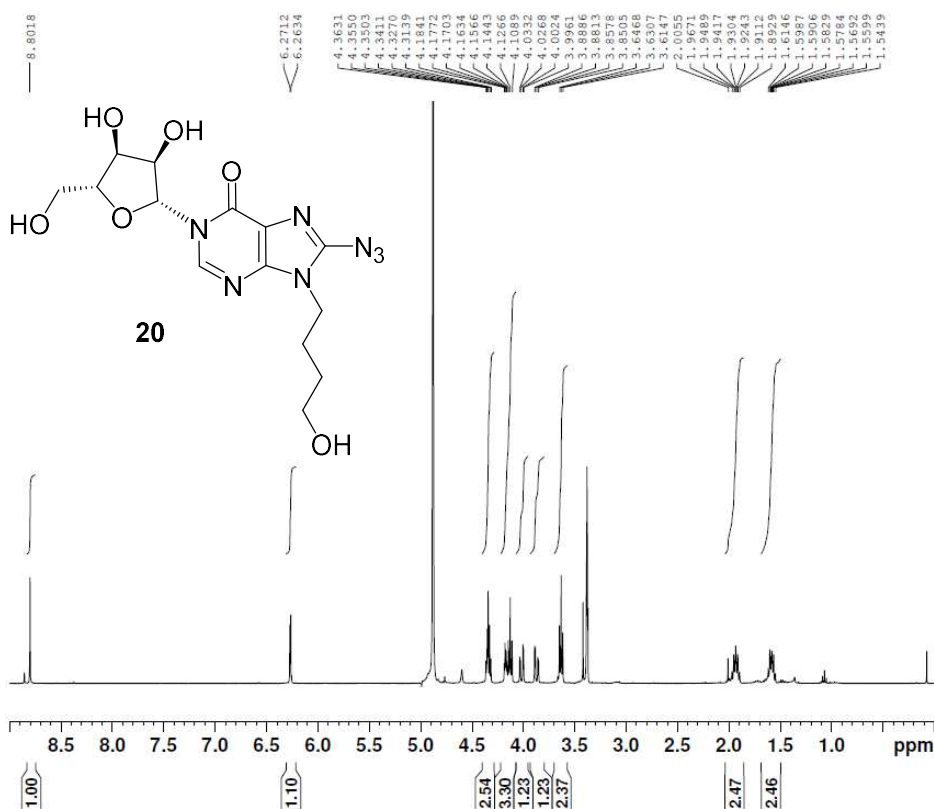

Current Data Parameters  
 NAME Aug12-2011-JMS10256  
 EXPNO 10  
 PROCNO 1

F2 - Acquisition Parameters  
 Date\_ 20110812  
 Time 17.06  
 INSTRUM AVII400  
 PROBHD 5 mm PABBO BB-  
 PULPROG zg30  
 TD 65536  
 SOLVENT MeOD  
 NS 16  
 DS 2  
 SWH 8223.685 Hz  
 FIDRES 0.125483 Hz  
 AQ 3.9845889 sec  
 RG 181  
 DW 60.800 usec  
 DE 17.24 usec  
 TE 298.0 K  
 D1 1.00000000 sec  
 TDO 1

===== CHANNEL f1 =====  
 NUC1 1H  
 P1 13.00 usec  
 PL1 0 dB  
 PL1W 9.74611950 W  
 SFO1 400.0424704 MHz

F2 - Processing parameters  
 SI 65536  
 SF 400.0399837 MHz  
 WDW EM  
 SSB 0  
 LB 0.20 Hz  
 GB 0  
 PC 1.00

JMS 533 T 6-8

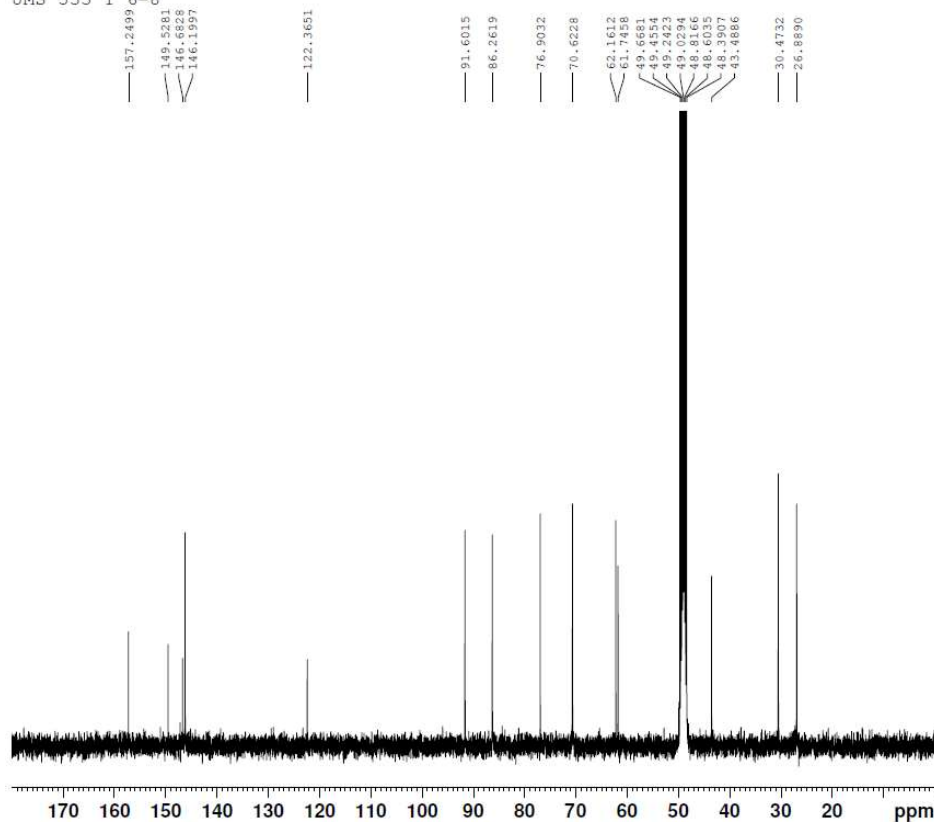

Current Data Parameters  
 NAME Aug12-2011-JMS10256  
 EXPNO 12  
 PROCNO 1

F2 - Acquisition Parameters  
 Date\_ 20110813  
 Time 5.33  
 INSTRUM AVII400  
 PROBHD 5 mm PABBO BB-  
 PULPROG zgpg30  
 TD 65536  
 SOLVENT MeOD  
 NS 2048  
 DS 4  
 SWH 24038.461 Hz  
 FIDRES 0.366798 Hz  
 AQ 1.3631488 sec  
 RG 2050  
 DW 20.800 usec  
 DE 6.50 usec  
 TE 298.0 K  
 D1 2.00000000 sec  
 D11 0.03000000 sec  
 TDO 1

===== CHANNEL f1 =====  
 NUC1 13C  
 P1 8.75 usec  
 PL1 -2.00 dB  
 PL1W 58.91986084 W  
 SFO1 100.6001970 MHz

===== CHANNEL f2 =====  
 CPDPRG2 waltz16  
 NUC2 1H  
 PCPD2 80.00 usec  
 PL2 0 dB  
 PL12 15.78 dB  
 PL13 19.00 dB  
 PL2W 9.74611950 W  
 PL12W 0.25753233 W  
 PL13W 0.12269637 W  
 SFO2 400.0416002 MHz

F2 - Processing parameters  
 SI 65536  
 SF 100.5899952 MHz  
 WDW EM  
 SSB 0  
 LB 1.00 Hz  
 GB 0  
 PC 1.40

## SAMPLE INFORMATION

Sample Name: JMS 533 HPLC  
 Sample Type: Unknown  
 Vial: 2  
 Injection #: 1  
 Injection Volume: 10.00 ul  
 Run Time: 20.0 Minutes  
 Sample Set Name: JMS 510 533 545 HPLC

Acquired By: Christelle  
 Date Acquired: 25/10/2011 4:24:49 PM  
 Acq. Method Set: RP18 LC  
 Date Processed: 28/10/2011 12:23:30 PM  
 Processing Method: JMS 533 HPLC  
 Channel Name: WvlnCh1  
 Proc. Chnl. Descr.: PDA 262.1 nm

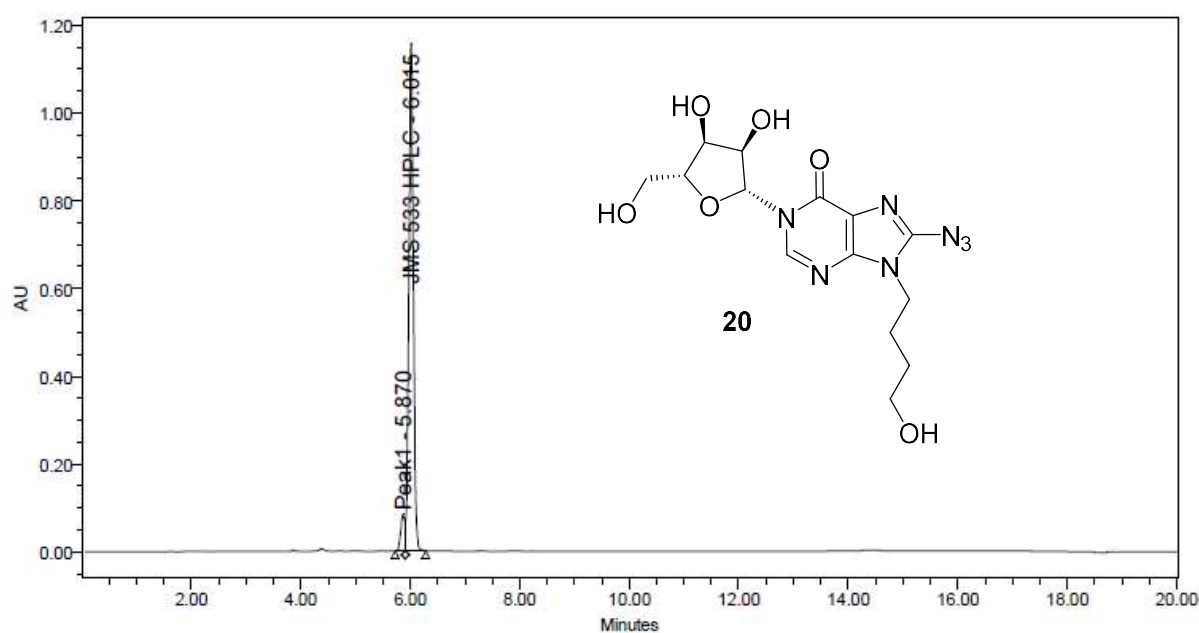

|   | Peak Name    | RT    | Area    | % Area | Height  |
|---|--------------|-------|---------|--------|---------|
| 1 | Peak1        | 5.870 | 424215  | 5.84   | 83250   |
| 2 | JMS 533 HPLC | 6.015 | 6835625 | 94.16  | 1157681 |

JMS507 T30

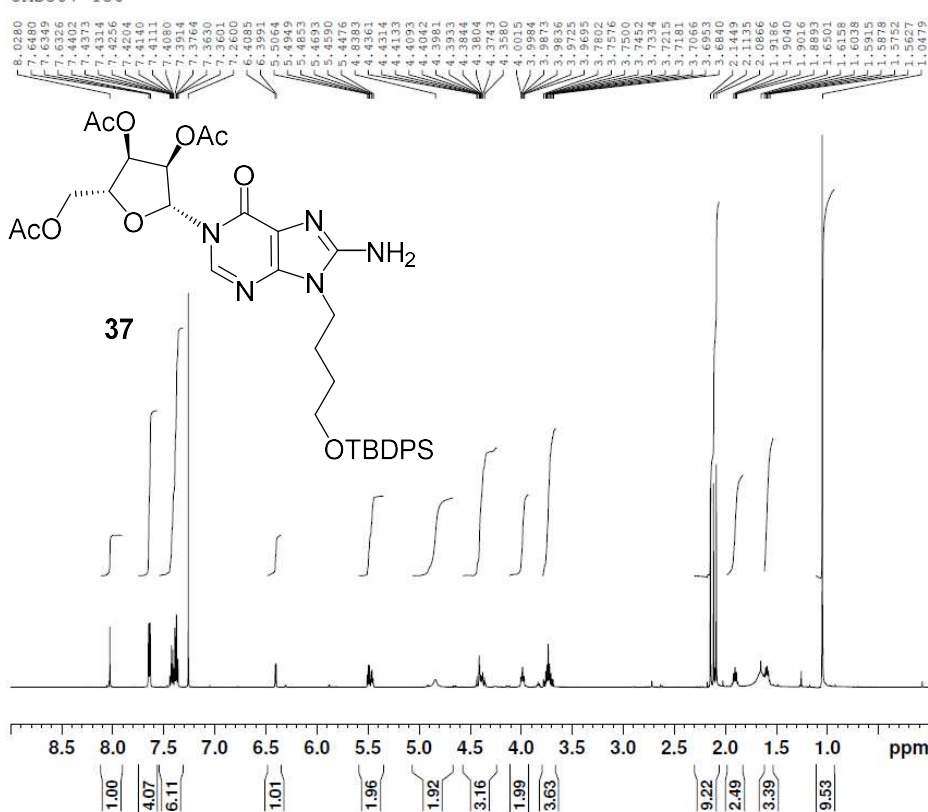

Current Data Parameters  
 NAME JMS507 T30  
 EXPNO 10  
 PROCNO 1

F2 - Acquisition Parameters  
 Date\_ 20110802  
 Time 19.47  
 INSTRUM spect  
 PROBHD 5 mm PABBO BB-  
 PULPROG zg30  
 TD 65536  
 SOLVENT CDCl3  
 NS 16  
 DS 2  
 SWH 10330.578 Hz  
 FIDRES 0.157632 Hz  
 AQ 3.1719425 sec  
 RG 256  
 DW 48.400 usec  
 DE 13.94 usec  
 TE 297.9 K  
 D1 1.00000000 sec  
 TD0 1

===== CHANNEL f1 =====  
 NUC1 1H  
 P1 10.30 usec  
 PL1 -0.12 dB  
 PL1W 19.35150909 W  
 SFO1 500.1330885 MHz  
 F2 - Processing parameters  
 SI 32768  
 SF 500.1300132 MHz  
 WDW EM  
 SSB 0  
 LB 0.30 Hz  
 GB 0  
 PC 1.00

JMS507 T30

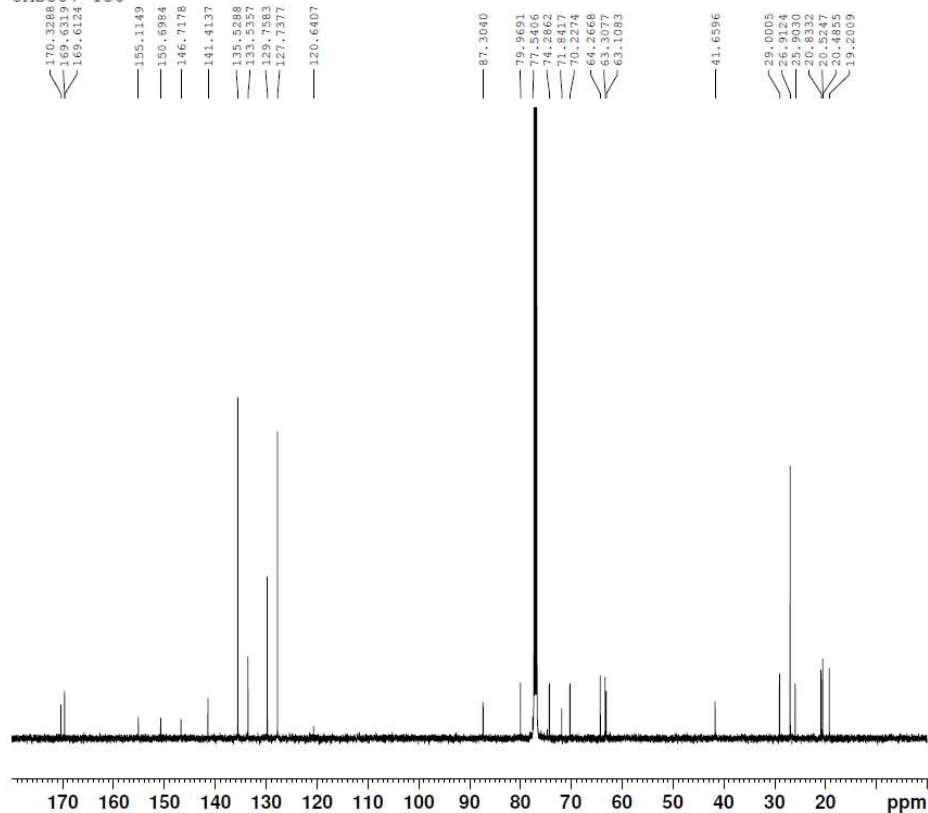

Current Data Parameters  
 NAME JMS507 T30  
 EXPNO 11  
 PROCNO 1

F2 - Acquisition Parameters  
 Date\_ 20110803  
 Time 4.50  
 INSTRUM spect  
 PROBHD 5 mm PABBO BB-  
 PULPROG zgpg30  
 TD 65536  
 SOLVENT CDCl3  
 NS 10240  
 DS 4  
 SWH 29761.904 Hz  
 FIDRES 0.454131 Hz  
 AQ 1.1010048 sec  
 RG 2050  
 DW 16.800 usec  
 DE 8.43 usec  
 TE 298.0 K  
 D1 2.00000000 sec  
 D11 0.03000000 sec  
 TD0 1

===== CHANNEL f1 =====  
 NUC1 13C  
 P1 9.50 usec  
 PL1 -0.51 dB  
 PL1W 99.92730713 W  
 SFO1 125.7703643 MHz

===== CHANNEL f2 =====  
 CPDPRG2 waltz16  
 NUC2 1H  
 P2 80.00 usec  
 PL2 -0.12 dB  
 PL12 17.94 dB  
 PL13 21.00 dB  
 PL2W 19.35150909 W  
 PL12W 0.30249262 W  
 PL13W 0.14952536 W  
 SFO2 500.1320005 MHz

F2 - Processing parameters  
 SI 32768  
 SF 125.7577905 MHz  
 WDW EM  
 SSB 0  
 LB 1.00 Hz  
 GB 0  
 PC 1.40

JMS 514 T 10-18

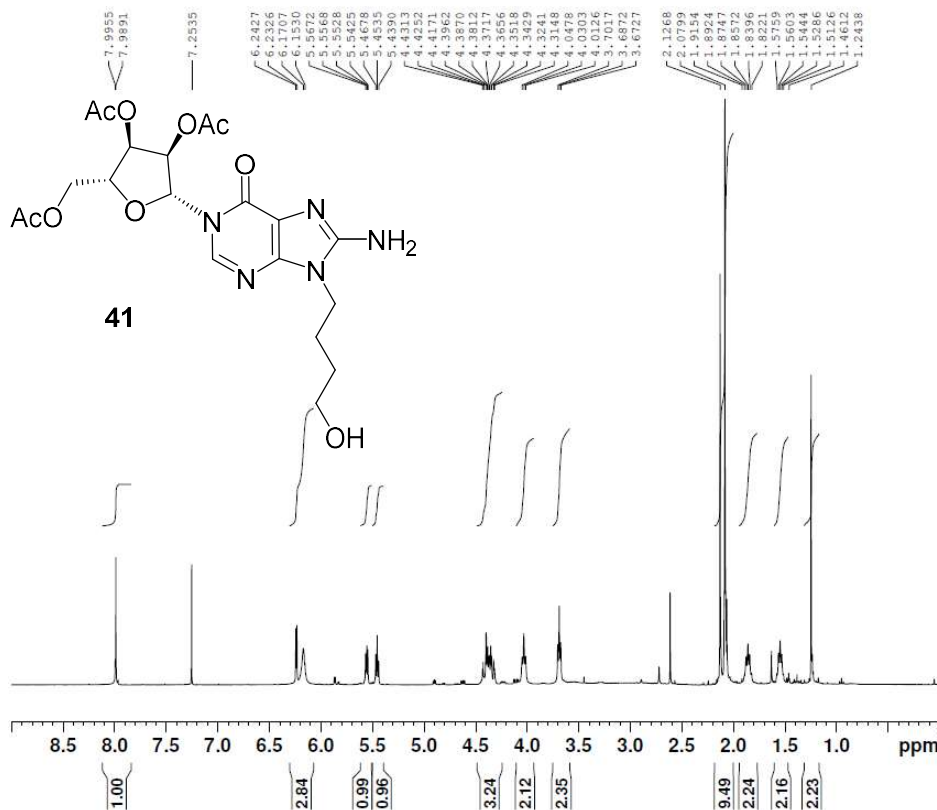

Current Data Parameters  
NAME Aug02-2011-JMS11809  
EXPNO 10  
PROCNO 1

F2 - Acquisition Parameters  
Date\_ 20110802  
Time 17.38  
INSTRUM AVIII400  
PROBHD 5 mm PABBO BB-  
PULPROG zg30  
TD 65536  
SOLVENT CDCl3  
NS 16  
DS 2  
SWH 8223.685 Hz  
FIDRES 0.125483 Hz  
AQ 3.9845889 sec  
RG 101  
DW 60.800 usec  
DE 17.24 usec  
TE 298.0 K  
D1 1.00000000 sec  
TD0 1

===== CHANNEL f1 =====  
NUC1 1H  
P1 13.00 usec  
PL1 0 dB  
PL1W 9.74611950 W  
SFO1 400.0424704 MHz

F2 - Processing parameters  
SI 65536  
SF 400.0399837 MHz  
WDW EM  
SSB 0  
LB 0.20 Hz  
GB 0  
PC 1.00

JMS 514 T 10-18

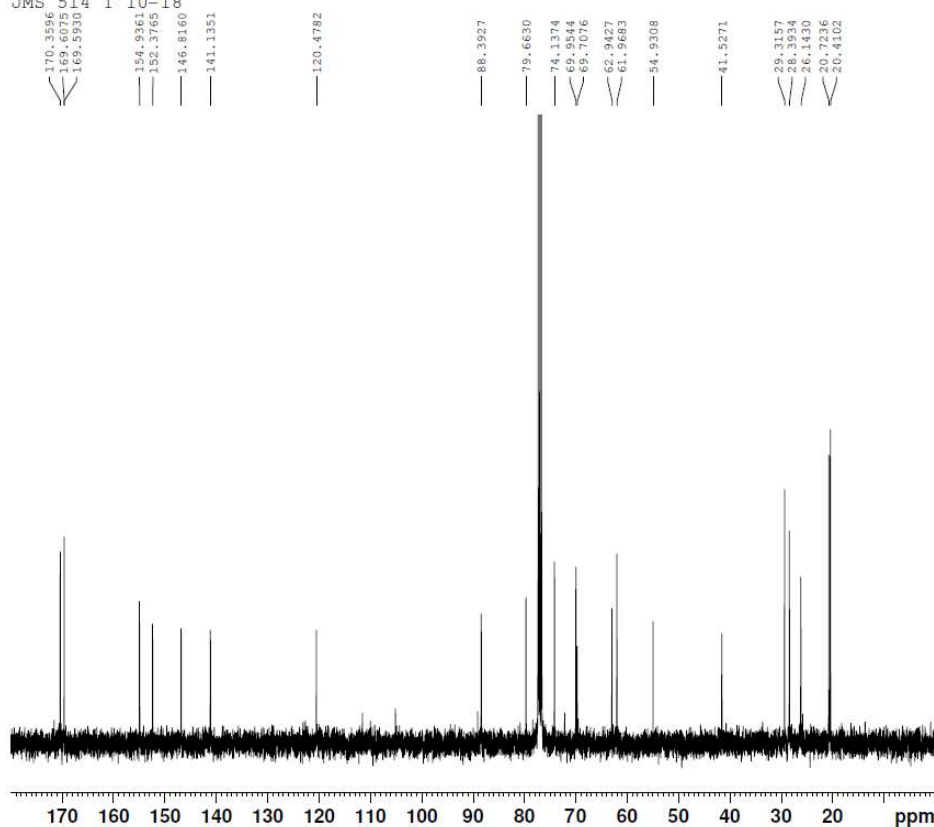

Current Data Parameters  
NAME Aug02-2011-JMS11809  
EXPNO 14  
PROCNO 1

F2 - Acquisition Parameters  
Date\_ 20110803  
Time 7.45  
INSTRUM AVIII400  
PROBHD 5 mm PABBO BB-  
PULPROG zgpg30  
TD 65536  
SOLVENT CDCl3  
NS 512  
DS 4  
SWH 24038.461 Hz  
FIDRES 0.366798 Hz  
AQ 1.3631488 sec  
RG 2050  
DW 20.800 usec  
DE 6.50 usec  
TE 298.0 K  
D1 2.00000000 sec  
D11 0.03000000 sec  
TD0 1

===== CHANNEL f1 =====  
NUC1 13C  
P1 8.75 usec  
PL1 -2.00 dB  
PL1W 58.91986084 W  
SFO1 100.6001970 MHz

===== CHANNEL f2 =====  
CPDPRG2 waltz16  
NUC2 1H  
PCPD2 80.00 usec  
PL2 0 dB  
PL12 15.78 dB  
PL13 19.00 dB  
PL2W 9.74611950 W  
PL12W 0.25753233 W  
PL13W 0.12269637 W  
SFO2 400.0416002 MHz

F2 - Processing parameters  
SI 65536  
SF 100.5901380 MHz  
WDW EM  
SSB 0  
LB 1.00 Hz  
GB 0  
PC 1.40

JMS 519 T 10-11

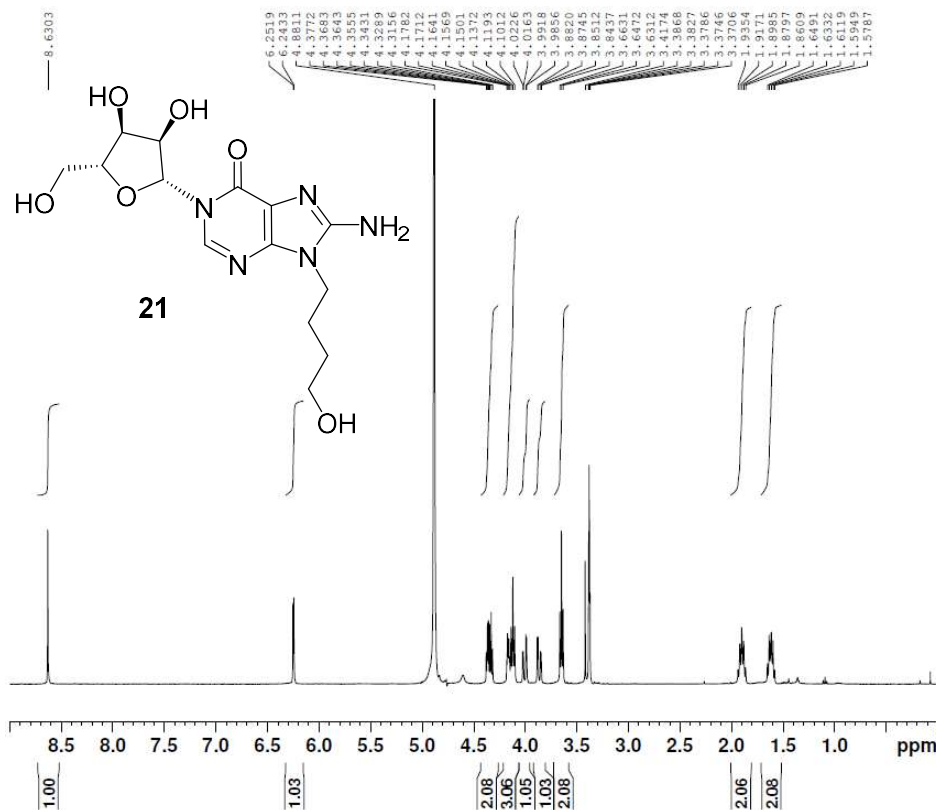

Current Data Parameters  
 NAME Aug08-2011-JMS11948  
 EXPNO 10  
 PROCNO 1

F2 - Acquisition Parameters  
 Date\_ 20110809  
 Time 8.02  
 INSTRUM AVIII400  
 PROBHD 5 mm PABBO BB-  
 PULPROG zg30  
 TD 65536  
 SOLVENT MeOD  
 NS 16  
 DS 2  
 SWH 8223.685 Hz  
 FIDRES 0.125483 Hz  
 AQ 3.9845889 sec  
 RG 144  
 DW 60.800 usec  
 DE 17.24 usec  
 TE 298.0 K  
 D1 1.00000000 sec  
 TD0 1

===== CHANNEL f1 =====  
 NUC1 1H  
 P1 13.00 usec  
 PL1 0 dB  
 PL1W 9.74611950 W  
 SFO1 400.0424704 MHz

F2 - Processing parameters  
 SI 65536  
 SF 400.0399837 MHz  
 WDW EM  
 SSB 0  
 LB 0.20 Hz  
 GB 0  
 PC 1.00

JMS 519 T 10-11

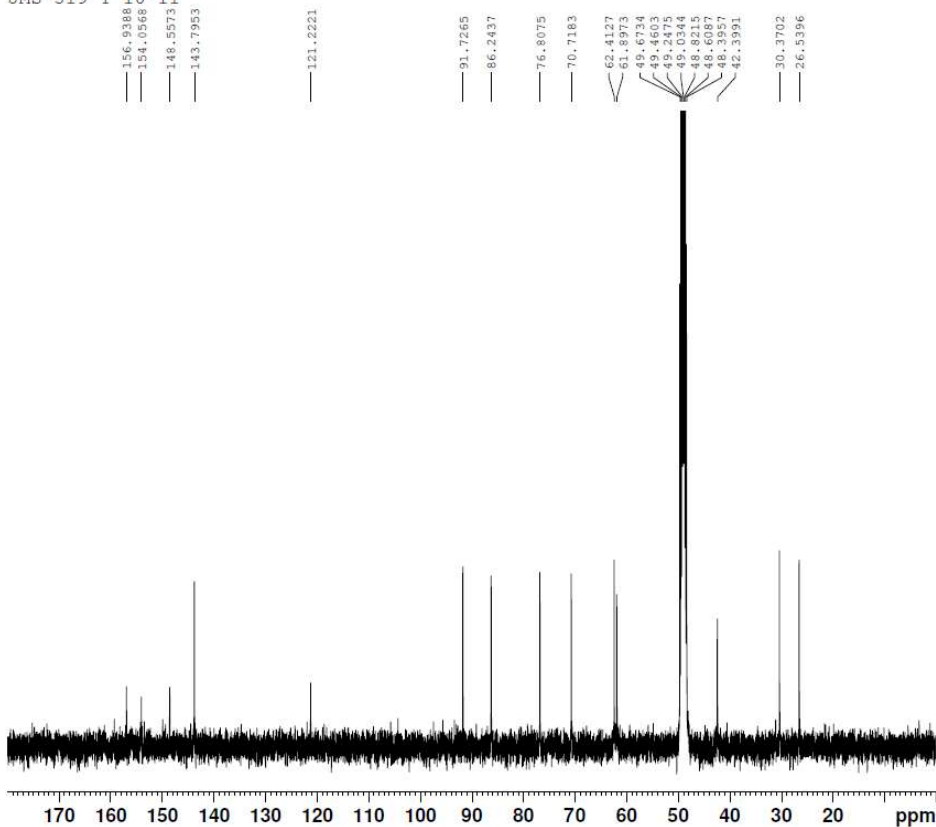

Current Data Parameters  
 NAME Aug08-2011-JMS11948  
 EXPNO 11  
 PROCNO 1

F2 - Acquisition Parameters  
 Date\_ 20110809  
 Time 22.22  
 INSTRUM AVIII400  
 PROBHD 5 mm PABBO BB-  
 PULPROG zgpg30  
 TD 65536  
 SOLVENT MeOD  
 NS 1024  
 DS 4  
 SWH 24038.461 Hz  
 FIDRES 0.366798 Hz  
 AQ 1.3631488 sec  
 RG 1820  
 DW 20.800 usec  
 DE 6.50 usec  
 TE 298.0 K  
 D1 2.00000000 sec  
 D11 0.03000000 sec  
 TD0 1

===== CHANNEL f1 =====  
 NUC1 13C  
 P1 8.75 usec  
 PL1 -2.00 dB  
 PL1W 58.91986084 W  
 SFO1 100.6001970 MHz

===== CHANNEL f2 =====  
 CPDPRG[2] waltz16  
 NUC2 1H  
 PCPD2 80.00 usec  
 PL2 0 dB  
 PL12 15.78 dB  
 PL13 19.00 dB  
 PL2W 9.74611950 W  
 PL12W 0.25753233 W  
 PL13W 0.12269637 W  
 SFO2 400.0416002 MHz

F2 - Processing parameters  
 SI 65536  
 SF 100.5899952 MHz  
 WDW EM  
 SSB 0  
 LB 1.00 Hz  
 GB 0  
 PC 1.40

## SAMPLE INFORMATION

Sample Name: JMS 519  
 Sample Type: Unknown  
 Vial: 33  
 Injection #: 1  
 Injection Volume: 10.00 ul  
 Run Time: 20.0 Minutes  
 Sample Set Name: JMS 509 510 519 532 533

Acquired By: Joanna  
 Date Acquired: 18/08/2011 1:12:30 PM  
 Acq. Method Set: RP18 LC  
 Date Processed: 18/08/2011 4:35:57 PM  
 Processing Method: JMS 519  
 Channel Name: WvlnCh1  
 Proc. Chnl. Descr.: PDA 262.1 nm

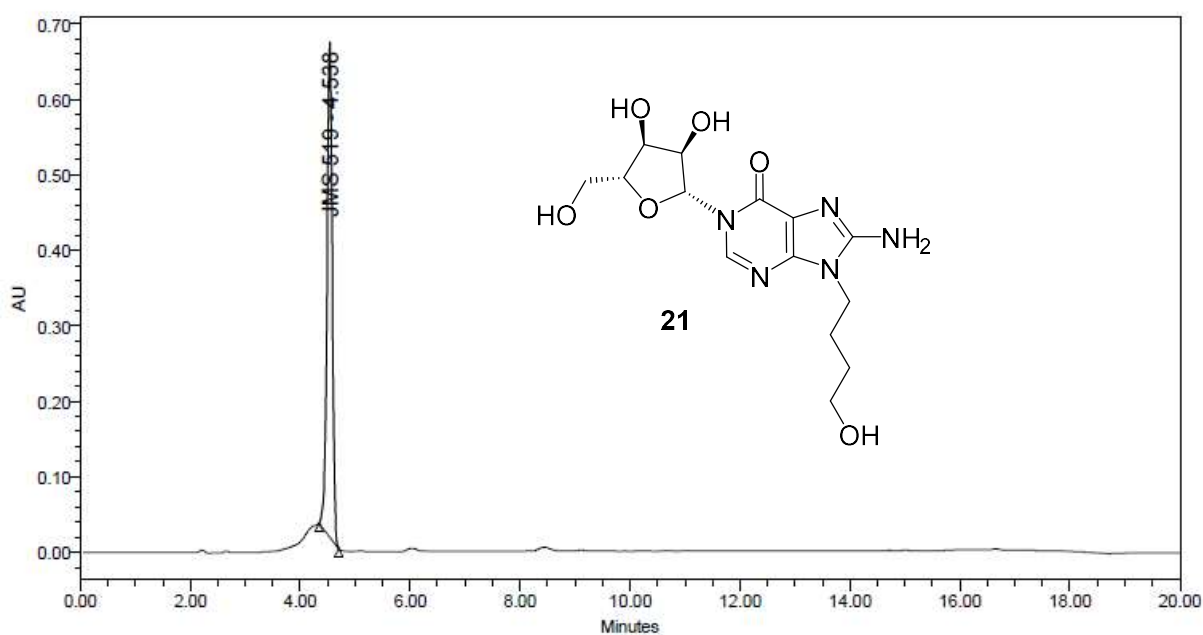

|   | Peak Name | RT    | Area    | % Area | Height |
|---|-----------|-------|---------|--------|--------|
| 1 | JMS 519   | 4.538 | 4357041 | 100.00 | 656981 |



# Total synthesis of *N*9-(4-hydroxybutyl)-*N*1-IMP analogues (22-25)

JMS 728 HPLC

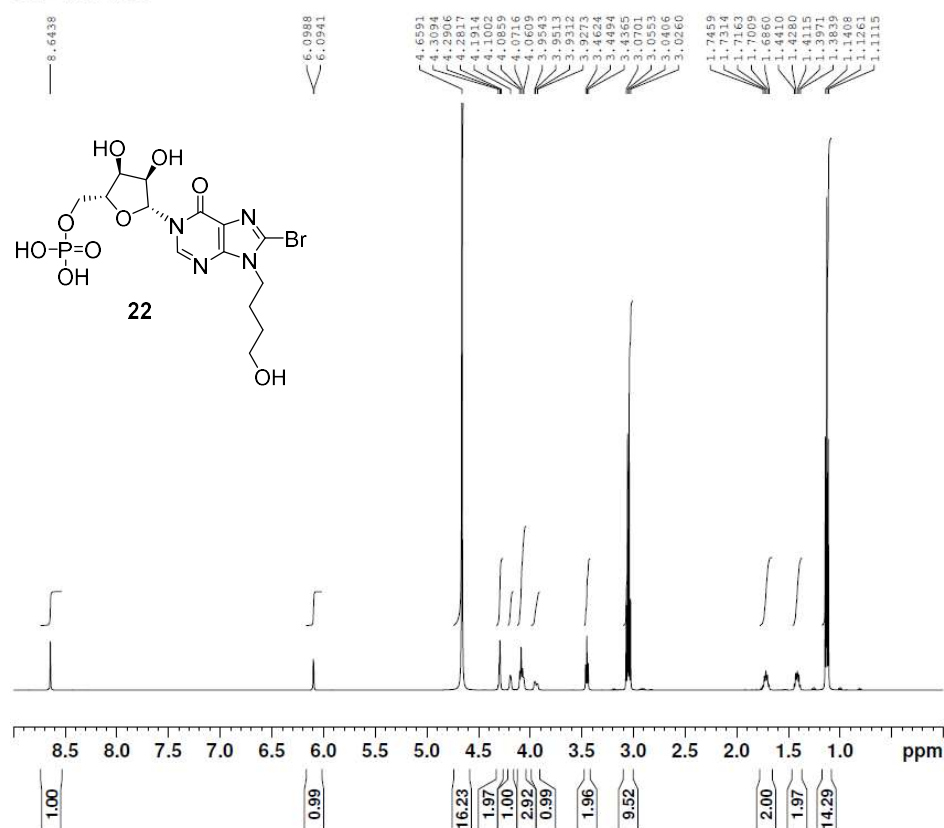

Current Data Parameters  
NAME Aug14-2012-JMS728  
EXPNO 10  
PROCNO 1

F2 - Acquisition Parameters  
Date\_ 20120814  
Time 22.58  
INSTRUM spect  
PROBHD 5 mm PABBO BB-  
PULPROG zg30  
TD 65536  
SOLVENT D2O  
NS 64  
DS 2  
SWH 10330.578 Hz  
FIDRES 0.157632 Hz  
AQ 3.1719425 sec  
RG 32  
DW 48.400 usec  
DE 13.94 usec  
TE 298.0 K  
D1 1.00000000 sec  
TD0 1

===== CHANNEL f1 =====  
NUC1 1H  
P1 10.30 usec  
PL1 -0.12 dB  
PL1W 19.35150909 W  
SFO1 500.1330885 MHz

F2 - Processing parameters  
SI 32768  
SF 500.1300222 MHz  
WDW EM  
SSB 0  
LB 0.30 Hz  
GB 0  
PC 1.00

JMS 728 HPLC

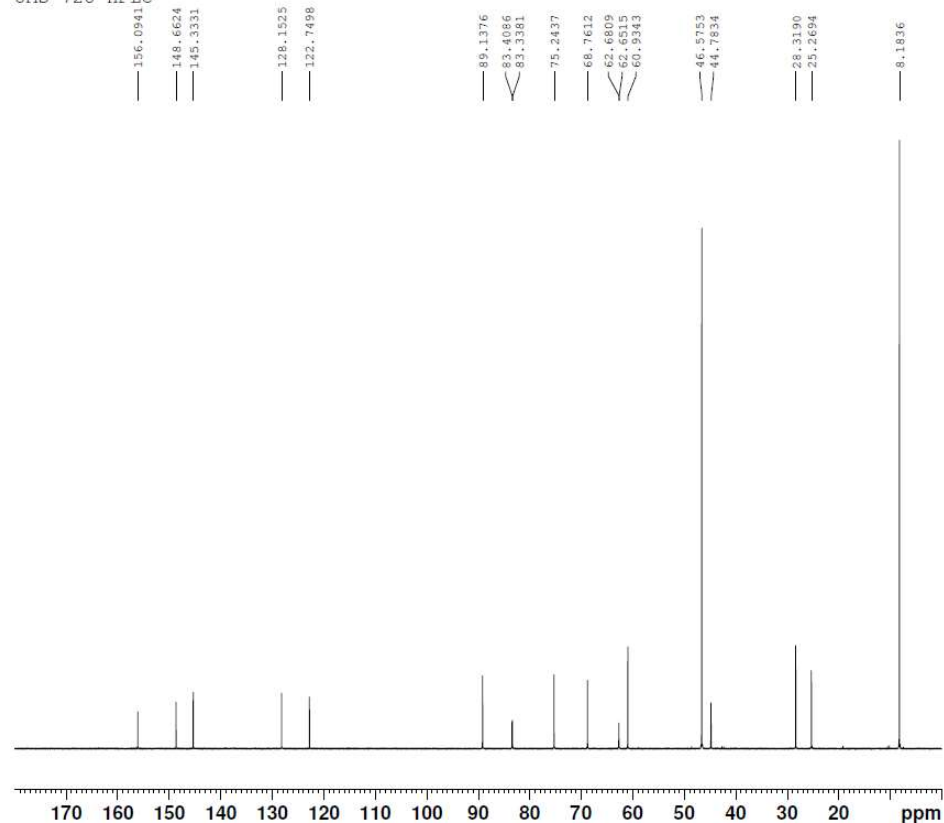

Current Data Parameters  
NAME Aug14-2012-JMS728  
EXPNO 11  
PROCNO 1

F2 - Acquisition Parameters  
Date\_ 20120815  
Time 3.23  
INSTRUM spect  
PROBHD 5 mm PABBO BB-  
PULPROG zgpg30  
TD 65536  
SOLVENT D2O  
NS 5000  
DS 4  
SWH 29761.904 Hz  
FIDRES 0.454131 Hz  
AQ 1.1010048 sec  
RG 2050  
DW 16.800 usec  
DE 8.43 usec  
TE 298.0 K  
D1 2.00000000 sec  
D11 0.03000000 sec  
TD0 1

===== CHANNEL f1 =====  
NUC1 13C  
P1 9.50 usec  
PL1 -0.51 dB  
PL1W 99.92730713 W  
SFO1 125.7703643 MHz

===== CHANNEL f2 =====  
CPDPRG[2] waltz16  
NUC2 1H  
PCPD2 80.00 usec  
PL2 -0.12 dB  
PL12 17.94 dB  
PL13 21.00 dB  
PL2W 19.35150909 W  
PL12W 0.30249262 W  
PL13W 0.14952536 W  
SFO2 500.1320005 MHz

F2 - Processing parameters  
SI 32768  
SF 125.7577890 MHz  
WDW EM  
SSB 0  
LB 1.00 Hz  
GB 0  
PC 1.40



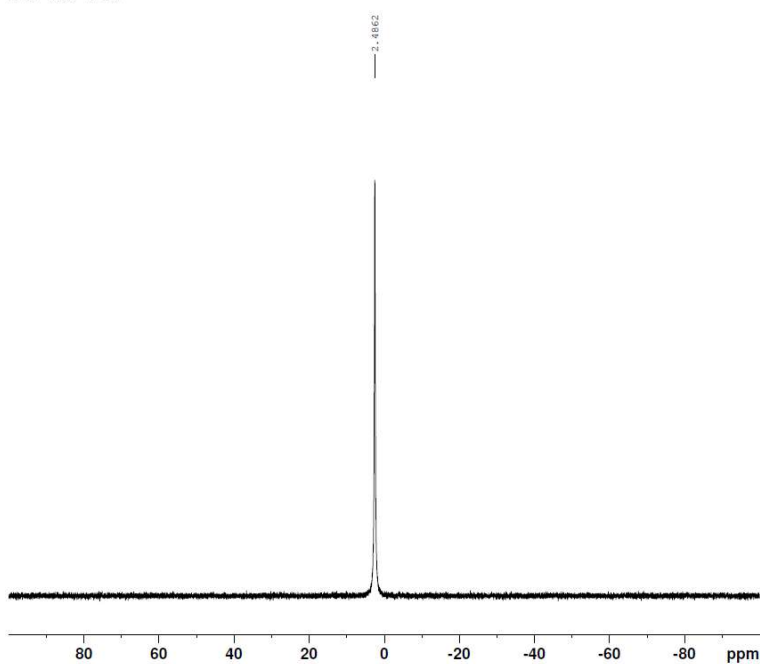

Current Data Parameters  
NAME Aug14-2012-JMS728  
EXPNO 13  
PROCNO 1

F2 - Acquisition Parameters  
Date\_ 20120815  
Time 4.04  
INSTRUM spect  
PROBHD 5 mm PABBO BB-  
PULPROG zgpg30  
TD 65536  
SOLVENT D2O  
NS 256  
DS 4  
SWH 81521.742 Hz  
FIDRES 1.243923 Hz  
AQ 0.4019541 sec  
RG 2050  
DW 6.133 usec  
DE 6.50 usec  
TE 298.0 K  
D1 2.00000000 sec  
D11 0.03000000 sec  
TD0 1

===== CHANNEL f1 =====  
NUC1 31P  
P1 12.00 usec  
PL1 -0.46 dB  
PL1W 90.28126526 W  
SFO1 202.4462121 MHz

===== CHANNEL f2 =====  
CPDPRG2 waltz16  
NUC2 1H  
PCPD2 80.00 usec  
PL2 -0.12 dB  
PL12 17.94 dB  
PL13 21.00 dB  
PL2W 19.35150909 W  
PL12W 0.30249262 W  
PL13W 0.14952536 W  
SFO2 500.1320005 MHz

F2 - Processing parameters  
SI 32768  
SF 202.4563350 MHz  
WDW EM  
SSB 0  
LB 1.00 Hz  
GB 0  
PC 1.40

## SAMPLE INFORMATION

Sample Name: JMS 728 B4  
Sample Type: Unknown  
Vial: 4  
Injection #: 1  
Injection Volume: 10.00 ul  
Run Time: 12.0 Minutes  
Sample Set Name: JMS 728 HPLC B

Acquired By: Joanna  
Date Acquired: 02/08/2012 2:03:42 PM  
Acq. Method Set: isocratic new PDA Jo  
Date Processed: 11/09/2012 10:40:43 AM  
Processing Method: JMS 728  
Channel Name: WvIn Ch1  
Proc. Chnl. Descr.: PDA 254.0 nm

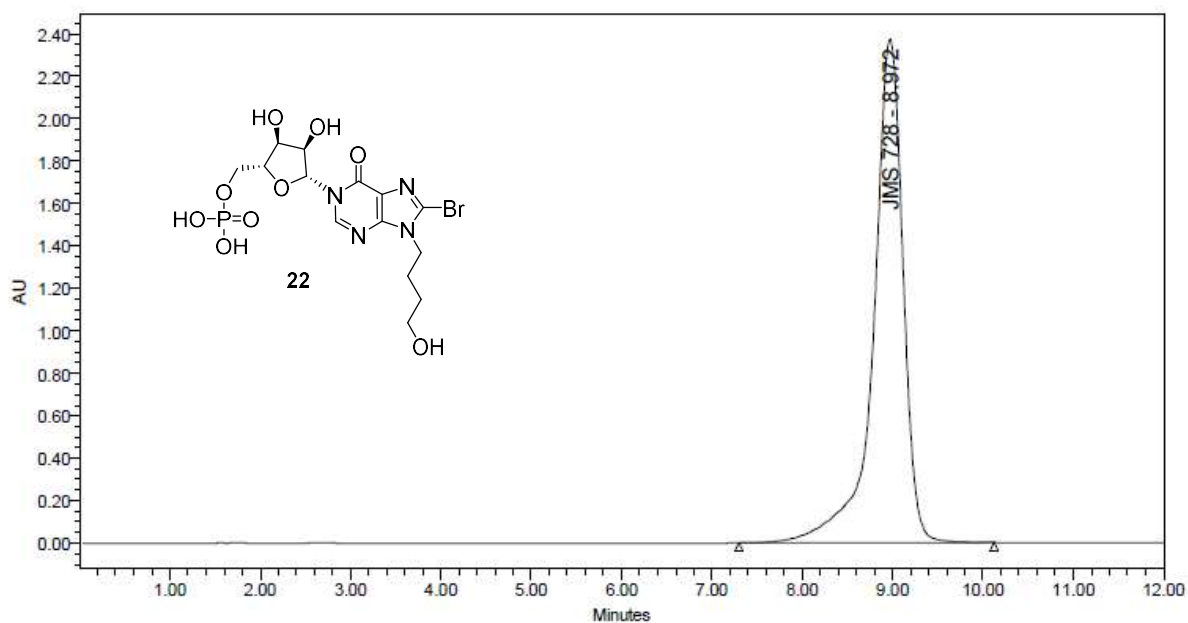

|   | Peak Name | RT    | Area     | % Area | Height  |
|---|-----------|-------|----------|--------|---------|
| 1 | JMS 728   | 8.972 | 54319768 | 100.00 | 2372340 |

## JMS 729 HPLC

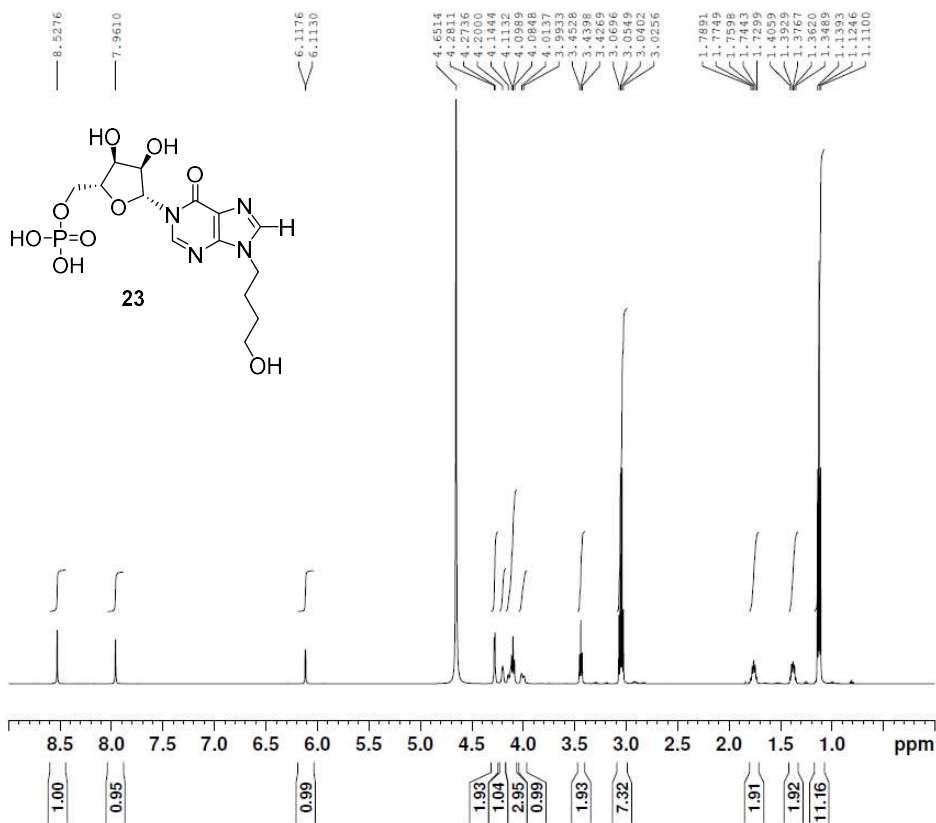

Current Data Parameters  
 NAME Aug14-2012-JMS729  
 EXPNO 10  
 PROCNO 1

F2 - Acquisition Parameters  
 Date\_ 20120814  
 Time 16.30  
 INSTRUM spect  
 PROBHD 5 mm PABBO BB-  
 PULPROG zg30  
 TD 65536  
 SOLVENT D2O  
 NS 64  
 DS 2  
 SWH 10330.578 Hz  
 FIDRES 0.157632 Hz  
 AQ 3.1719425 sec  
 RG 50.8  
 DW 48.400 usec  
 DE 13.94 usec  
 TE 298.0 K  
 D1 1.00000000 sec  
 TD0 1

===== CHANNEL f1 =====  
 NUC1 1H  
 P1 10.30 usec  
 PL1 -0.12 dB  
 PL1W 19.35150909 W  
 SFO1 500.1330885 MHz

F2 - Processing parameters  
 SI 32768  
 SF 500.1300262 MHz  
 WDW EM  
 SSB 0  
 LB 0.30 Hz  
 GB 0  
 PC 1.00

## JMS 729 HPLC

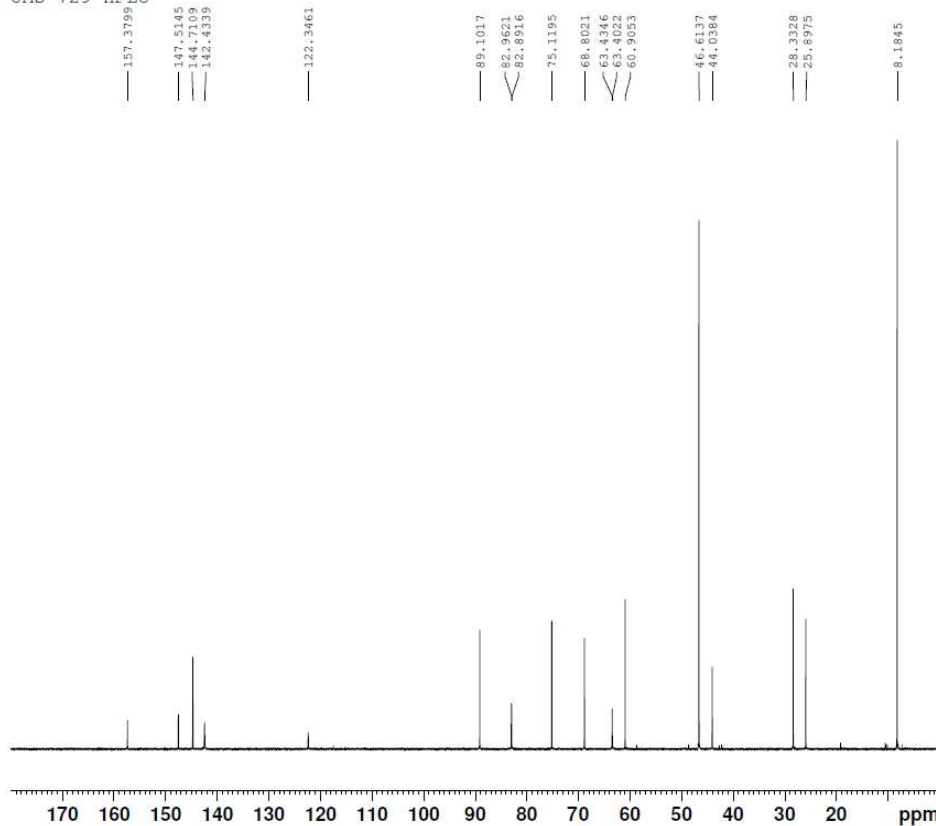

Current Data Parameters  
 NAME Aug14-2012-JMS729  
 EXPNO 11  
 PROCNO 1

F2 - Acquisition Parameters  
 Date\_ 20120814  
 Time 18.07  
 INSTRUM spect  
 PROBHD 5 mm PABBO BB-  
 PULPROG zgpg30  
 TD 65536  
 SOLVENT D2O  
 NS 5000  
 DS 4  
 SWH 29761.904 Hz  
 FIDRES 0.454131 Hz  
 AQ 1.1010048 sec  
 RG 2050  
 DW 16.800 usec  
 DE 8.43 usec  
 TE 298.0 K  
 D1 2.00000000 sec  
 D11 0.03000000 sec  
 TD0 1

===== CHANNEL f1 =====  
 NUC1 13C  
 P1 9.50 usec  
 PL1 -0.51 dB  
 PL1W 99.92730713 W  
 SFO1 125.7703643 MHz

===== CHANNEL f2 =====  
 CPDPRG2 waltz16  
 NUC2 1H  
 PCPD2 80.00 usec  
 PL2 -0.12 dB  
 PL12 17.94 dB  
 PL13 21.00 dB  
 PL2W 19.35150909 W  
 PL12W 0.30249262 W  
 PL13W 0.14952536 W  
 SFO2 500.1320005 MHz

F2 - Processing parameters  
 SI 32768  
 SF 125.7577890 MHz  
 WDW EM  
 SSB 0  
 LB 1.00 Hz  
 GB 0  
 PC 1.40

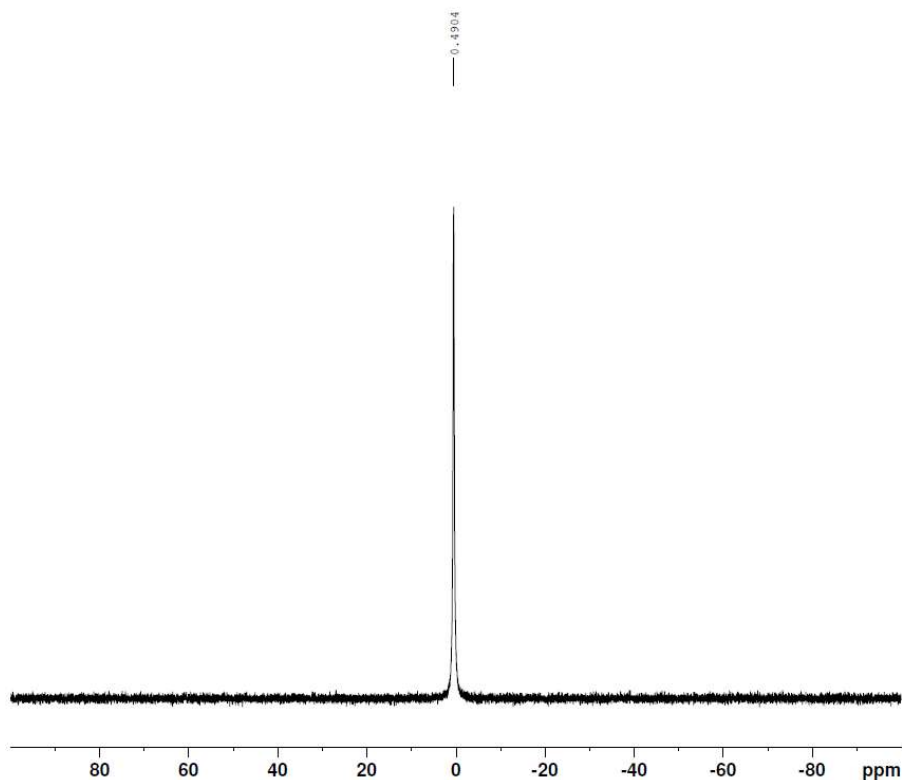

Current Data Parameters  
 NAME Aug14-2012-JMS729  
 EXPNO 13  
 PROCNO 1

F2 - Acquisition Parameters  
 Date\_ 20120814  
 Time 21.39  
 INSTRUM spect  
 PROBHD 5 mm PABBO BB-  
 PULPROG zgpg30  
 TD 65536  
 SOLVENT D2O  
 NS 256  
 DS 4  
 SWH 81521.742 Hz  
 FIDRES 1.243923 Hz  
 AQ 0.4019541 sec  
 RG 2050  
 DW 6.133 usec  
 DE 6.50 usec  
 TE 298.0 K  
 D1 2.0000000 sec  
 D11 0.0300000 sec  
 TD0 1

===== CHANNEL f1 =====  
 NUC1 31P  
 P1 12.00 usec  
 PL1 -0.46 dB  
 PL1W 90.28126526 W  
 SFO1 202.4462121 MHz

===== CHANNEL f2 =====  
 CPDPRG2 waltz16  
 NUC2 1H  
 PCPD2 80.00 usec  
 PL2 -0.12 dB  
 PL12 17.94 dB  
 PL13 21.00 dB  
 PL2W 19.35150909 W  
 PL12W 0.30249262 W  
 PL13W 0.14952536 W  
 SFO2 500.1320005 MHz

F2 - Processing parameters  
 SI 32768  
 SF 202.4563350 MHz  
 WDW EM  
 SSB 0  
 LB 1.00 Hz  
 GB 0  
 PC 1.40

## SAMPLE INFORMATION

Sample Name: JMS 729 D5  
 Sample Type: Unknown  
 Vial: 54  
 Injection #: 1  
 Injection Volume: 10.00 ul  
 Run Time: 8.0 Minutes  
 Sample Set Name: JMS 729 HPLC D

Acquired By: Joanna  
 Date Acquired: 01/08/2012 6:46:31 PM  
 Acq. Method Set: isocratic new PDA Jo  
 Date Processed: 11/09/2012 10:41:43 AM  
 Processing Method: JMS 729  
 Channel Name: WvIn Ch1  
 Proc. Chnl. Descr.: PDA 254.0 nm

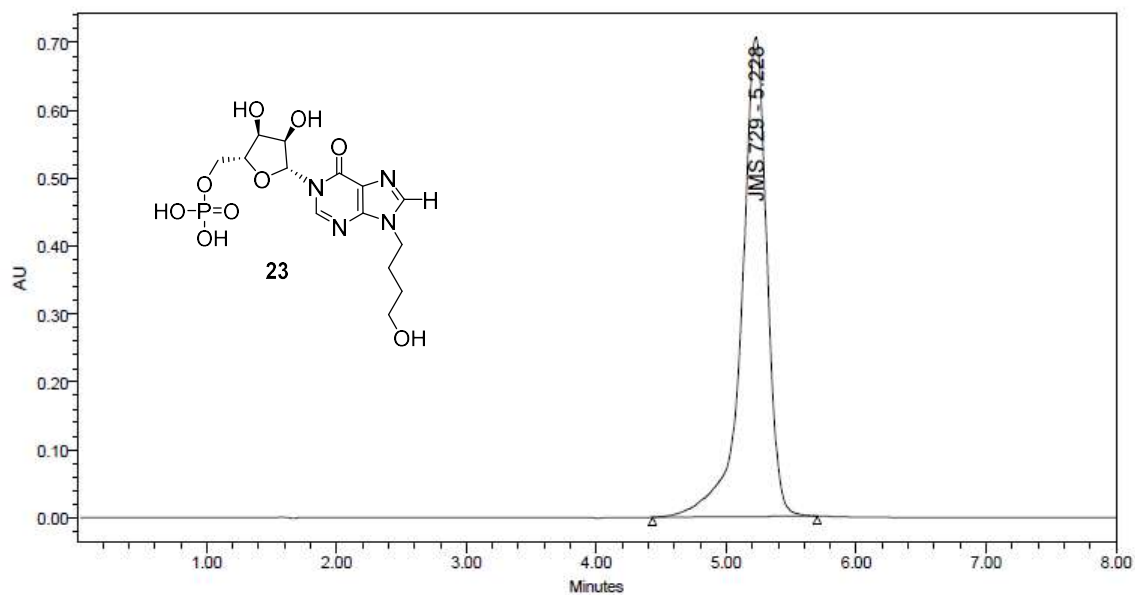

|   | Peak Name | RT    | Area    | % Area | Height |
|---|-----------|-------|---------|--------|--------|
| 1 | JMS 729   | 5.228 | 9565167 | 100.00 | 706064 |

JMS 742 HPLC

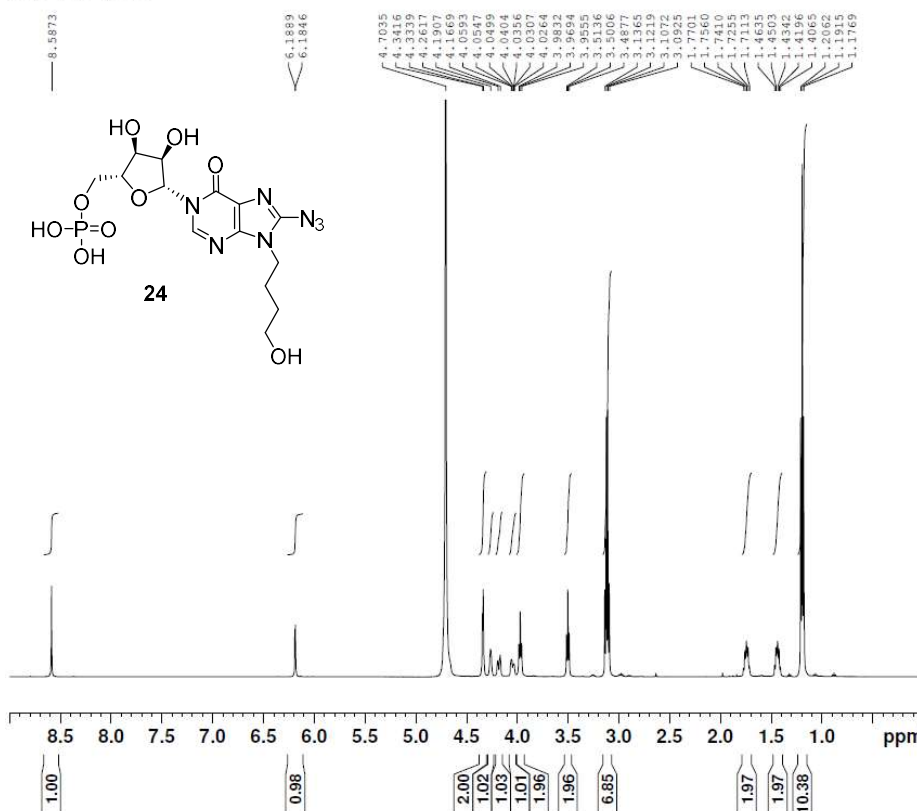

Current Data Parameters  
 NAME Oct10-2012-JMS742HPLC  
 EXPNO 10  
 PROCNO 1

F2 - Acquisition Parameters  
 Date\_ 20121010  
 Time 17.17  
 INSTRUM spect  
 PROBHD 5 mm PABBO BB-  
 PULPROG zg30  
 TD 65536  
 SOLVENT D2O  
 NS 64  
 DS 2  
 SWH 10330.578 Hz  
 FIDRES 0.157632 Hz  
 AQ 3.1719425 sec  
 RG 114  
 DW 48.400 usec  
 DE 13.94 usec  
 TE 298.0 K  
 D1 1.00000000 sec  
 TD0 1

===== CHANNEL f1 =====  
 NUC1 1H  
 P1 10.30 usec  
 PL1 -0.12 dB  
 PL1W 19.35150909 W  
 SFO1 500.1330885 MHz

F2 - Processing parameters  
 SI 32768  
 SF 500.1300000 MHz  
 WDW EM  
 SSB 0  
 LB 0.3 Hz  
 GB 0  
 PC 1.00

JMS 742 HPLC

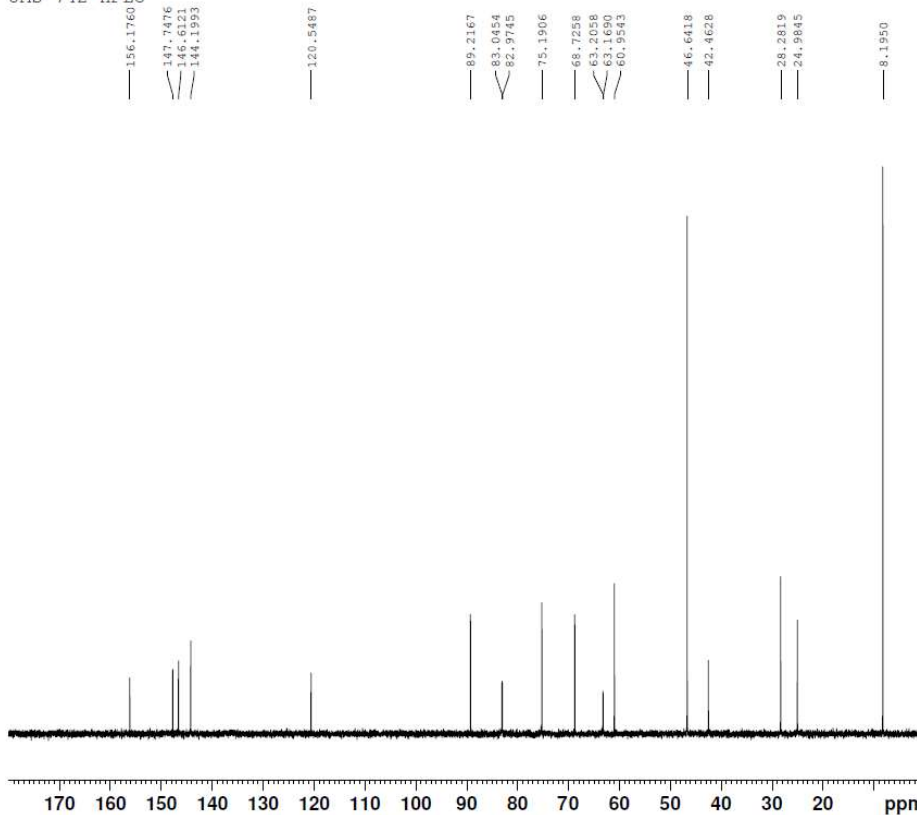

Current Data Parameters  
 NAME Oct10-2012-JMS742HPLC  
 EXPNO 12  
 PROCNO 1

F2 - Acquisition Parameters  
 Date\_ 20121010  
 Time 21.48  
 INSTRUM spect  
 PROBHD 5 mm PABBO BB-  
 PULPROG zgpg30  
 TD 65536  
 SOLVENT D2O  
 NS 5000  
 DS 4  
 SWH 29761.904 Hz  
 FIDRES 0.454131 Hz  
 AQ 1.1010048 sec  
 RG 2050  
 DW 16.800 usec  
 DE 8.43 usec  
 TE 298.0 K  
 D1 2.00000000 sec  
 D11 0.03000000 sec  
 TD0 1

===== CHANNEL f1 =====  
 NUC1 13C  
 P1 9.50 usec  
 PL1 -0.51 dB  
 PL1W 99.92730713 W  
 SFO1 125.7703643 MHz

===== CHANNEL f2 =====  
 CPDPRG[2] waltz16  
 NUC2 1H  
 PCPD2 80.00 usec  
 PL2 -0.12 dB  
 PL12 17.94 dB  
 PL13 21.00 dB  
 PL2W 19.35150909 W  
 PL12W 0.30249262 W  
 PL13W 0.14952536 W  
 SFO2 500.1320005 MHz

F2 - Processing parameters  
 SI 32768  
 SF 125.7577890 MHz  
 WDW EM  
 SSB 0  
 LB 1.00 Hz  
 GB 0  
 PC 1.40

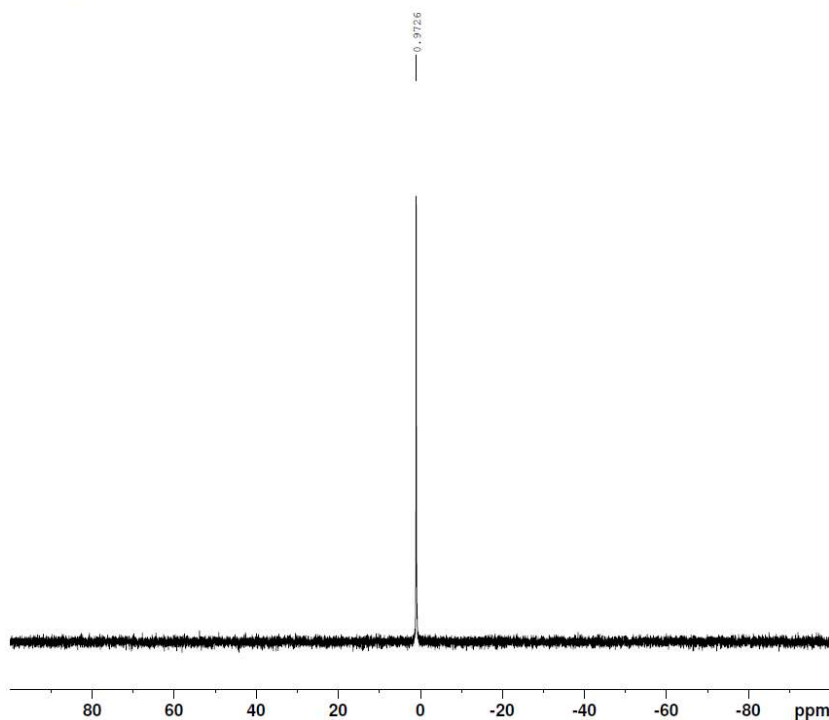

Current Data Parameters  
 NAME Oct10-2012-JMS742HPLC  
 EXPNO 18  
 PROCNO 1

F2 - Acquisition Parameters  
 Date\_ 20121011  
 Time 11.25  
 INSTRUM spect  
 PROBHD 5 mm PABBO BB-  
 PULPROG zgpg30  
 TD 65536  
 SOLVENT D2O  
 NS 127  
 DS 4  
 SWH 81521.742 Hz  
 FIDRES 1.243923 Hz  
 AQ 0.4019541 sec  
 RG 2050  
 DW 6.133 usec  
 DE 6.50 usec  
 TE 297.8 K  
 D1 2.00000000 sec  
 D11 0.03000000 sec  
 TD0 1

===== CHANNEL f1 =====  
 NUC1 31P  
 P1 12.00 usec  
 PL1 -0.46 dB  
 PL1W 90.28126526 W  
 SFO1 202.4462121 MHz

===== CHANNEL f2 =====  
 CPDPRG2 waltz16  
 NUC2 1H  
 PCPD2 80.00 usec  
 PL2 -0.12 dB  
 PL12 17.94 dB  
 PL13 21.00 dB  
 PL2W 19.35150909 W  
 PL12W 0.30249262 W  
 PL13W 0.14952536 W  
 SFO2 500.1320005 MHz

F2 - Processing parameters  
 SI 32768  
 SF 202.4563350 MHz  
 WDW EM  
 SSB 0  
 LB 1.00 Hz  
 GB 0  
 PC 1.40

## SAMPLE INFORMATION

Sample Name: JMS 742 C4  
 Sample Type: Unknown  
 Vial: 28  
 Injection #: 1  
 Injection Volume: 10.00 ul  
 Run Time: 15.0 Minutes  
 Sample Set Name: JMS 742 C

Acquired By: Joanna  
 Date Acquired: 09/10/2012 7:32:55 PM  
 Acq. Method Set: isocratic new PDA Jo  
 Date Processed: 09/04/2021 3:04:01 PM  
 Processing Method: 8\_N3\_butyl\_IMP  
 Channel Name: Wvln Ch1  
 Proc. Chnl. Descr.: PDA 254.0 nm

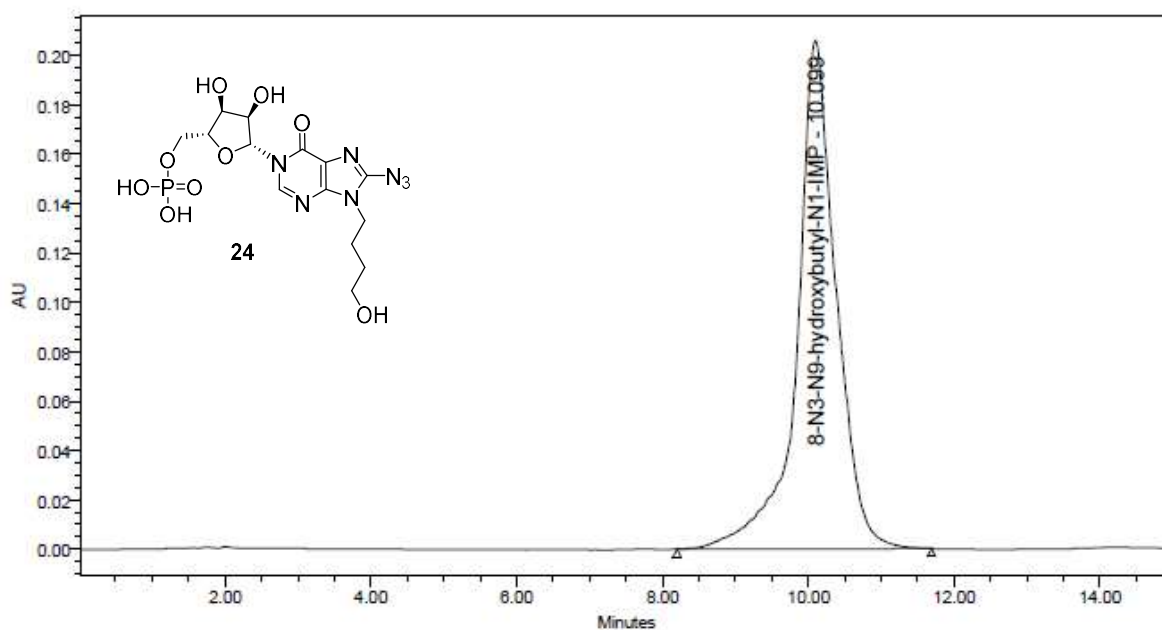

|   | Peak Name                   | RT     | Area    | % Area | Height |
|---|-----------------------------|--------|---------|--------|--------|
| 1 | 8-N3-N9-hydroxybutyl-N1-IMP | 10.099 | 7699465 | 100.00 | 205493 |



JMS 741 HPLC

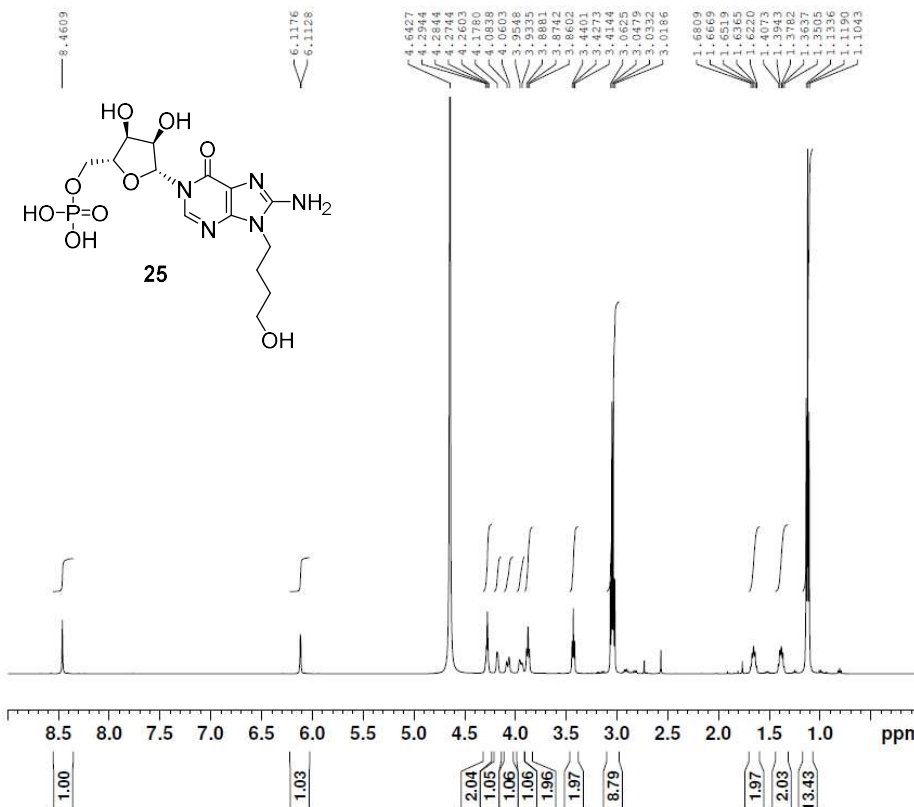

Current Data Parameters  
 NAME Oct08-2012-JMS741HPLC  
 EXPNO 10  
 PROCNO 1

F2 - Acquisition Parameters  
 Date\_ 20121008  
 Time 12.11  
 INSTRUM spect  
 PROBHD 5 mm PABBO BB-  
 PULPROG zg30  
 TD 65536  
 SOLVENT D2O  
 NS 100  
 DS 2  
 SWH 10330.578 Hz  
 FIDRES 0.157632 Hz  
 AQ 3.1719425 sec  
 RG 71.8  
 DW 48.400 usec  
 DE 13.94 usec  
 TE 298.0 K  
 D1 1.00000000 sec  
 TD0 1

===== CHANNEL f1 =====  
 NUC1 1H  
 P1 10.30 usec  
 PL1 -0.12 dB  
 PL1W 19.35150909 W  
 SFO1 500.1330885 MHz

F2 - Processing parameters  
 SI 32768  
 SF 500.1300305 MHz  
 WDW EM  
 SSB 0  
 LB 0.30 Hz  
 GB 0  
 PC 1.00

JMS 741 HPLC

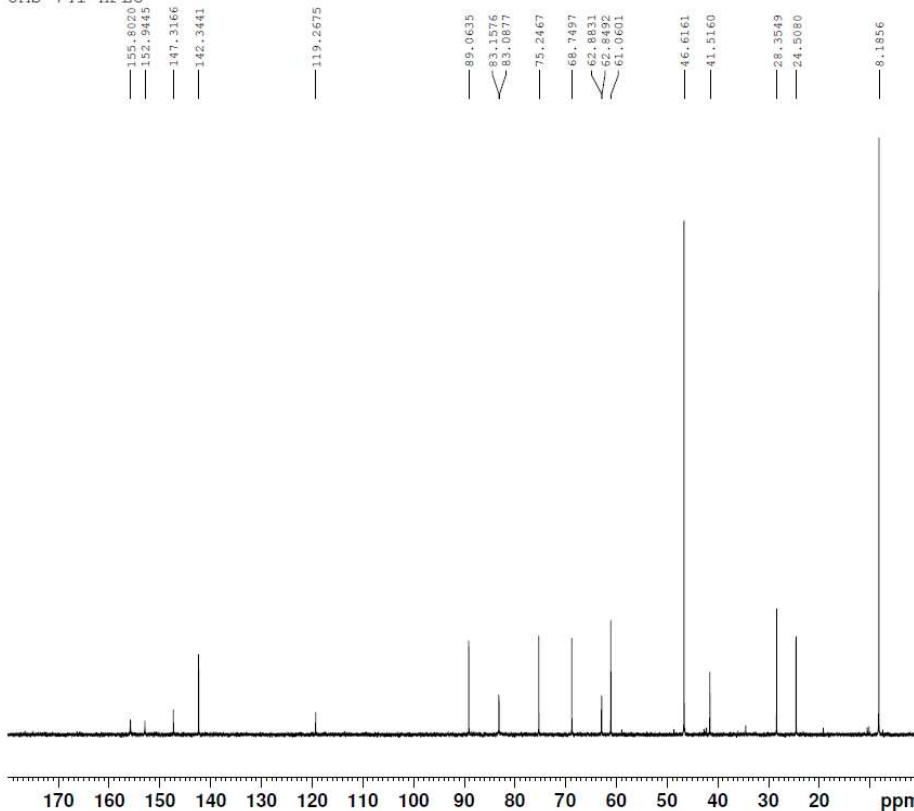

Current Data Parameters  
 NAME Oct08-2012-JMS741HPLC  
 EXPNO 12  
 PROCNO 1

F2 - Acquisition Parameters  
 Date\_ 20121008  
 Time 16.55  
 INSTRUM spect  
 PROBHD 5 mm PABBO BB-  
 PULPROG zgpg30  
 TD 65536  
 SOLVENT D2O  
 NS 5000  
 DS 4  
 SWH 29761.904 Hz  
 FIDRES 0.454131 Hz  
 AQ 1.1010048 sec  
 RG 2050  
 DW 16.800 usec  
 DE 8.43 usec  
 TE 298.0 K  
 D1 2.00000000 sec  
 D11 0.03000000 sec  
 TD0 1

===== CHANNEL f1 =====  
 NUC1 13C  
 P1 9.50 usec  
 PL1 -0.51 dB  
 PL1W 99.92730713 W  
 SFO1 125.7703643 MHz

===== CHANNEL f2 =====  
 CPDPRG[2] waltz16  
 NUC2 1H  
 PCPD2 80.00 usec  
 PL2 -0.12 dB  
 PL12 17.94 dB  
 PL13 21.00 dB  
 PL2W 19.35150909 W  
 PL12W 0.30249262 W  
 PL13W 0.14952536 W  
 SFO2 500.1320005 MHz

F2 - Processing parameters  
 SI 32768  
 SF 125.7577890 MHz  
 WDW EM  
 SSB 0  
 LB 1.00 Hz  
 GB 0  
 PC 1.40



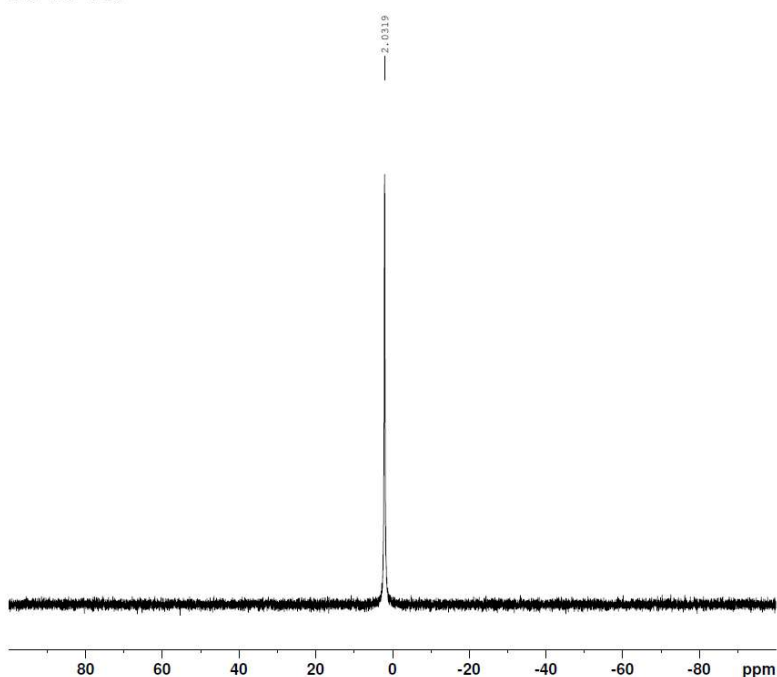

Current Data Parameters  
 NAME Oct08-2012-JMS741HPLC  
 EXPNO 11  
 PROCNO 1

F2 - Acquisition Parameters  
 Date\_ 20121008  
 Time 12.23  
 INSTRUM spect  
 PROBHD 5 mm PABBO BB-  
 PULPROG zgpg30  
 TD 65536  
 SOLVENT D2O  
 NS 256  
 DS 4  
 SWH 81521.742 Hz  
 FIDRES 1.243923 Hz  
 AQ 0.4019541 sec  
 RG 2050  
 DW 6.133 usec  
 DE 6.50 usec  
 TE 298.1 K  
 D1 2.00000000 sec  
 D11 0.03000000 sec  
 TD0 1

===== CHANNEL f1 =====  
 NUC1 31P  
 P1 12.00 usec  
 PL1 -0.46 dB  
 PL1W 90.28126526 W  
 SFO1 202.4462121 MHz

===== CHANNEL f2 =====  
 CPDPRG2 waltz16  
 NUC2 1H  
 PCPD2 80.00 usec  
 PL2 -0.12 dB  
 PL12 17.94 dB  
 PL13 21.00 dB  
 PL2W 19.35150909 W  
 PL12W 0.30249262 W  
 PL13W 0.14952536 W  
 SFO2 500.1320005 MHz

F2 - Processing parameters  
 SI 32768  
 SF 202.4563350 MHz  
 WDW EM  
 SSB 0  
 LB 1.00 Hz  
 GB 0  
 PC 1.40

## SAMPLE INFORMATION

Sample Name: JMS 743 E4  
 Sample Type: Unknown  
 Vial: 39  
 Injection #: 1  
 Injection Volume: 10.00 ul  
 Run Time: 10.0 Minutes  
 Sample Set Name: JMS 743 E

Acquired By: Joanna  
 Date Acquired: 05/10/2012 10:41:28 AM  
 Acq. Method Set: isocratic new PDA Jo  
 Date Processed: 05/10/2012 12:33:23 PM  
 Processing Method: 8NH2 N9butyl IMP  
 Channel Name: WvIn Ch1  
 Proc. Chnl. Descr.: PDA 254.0 nm

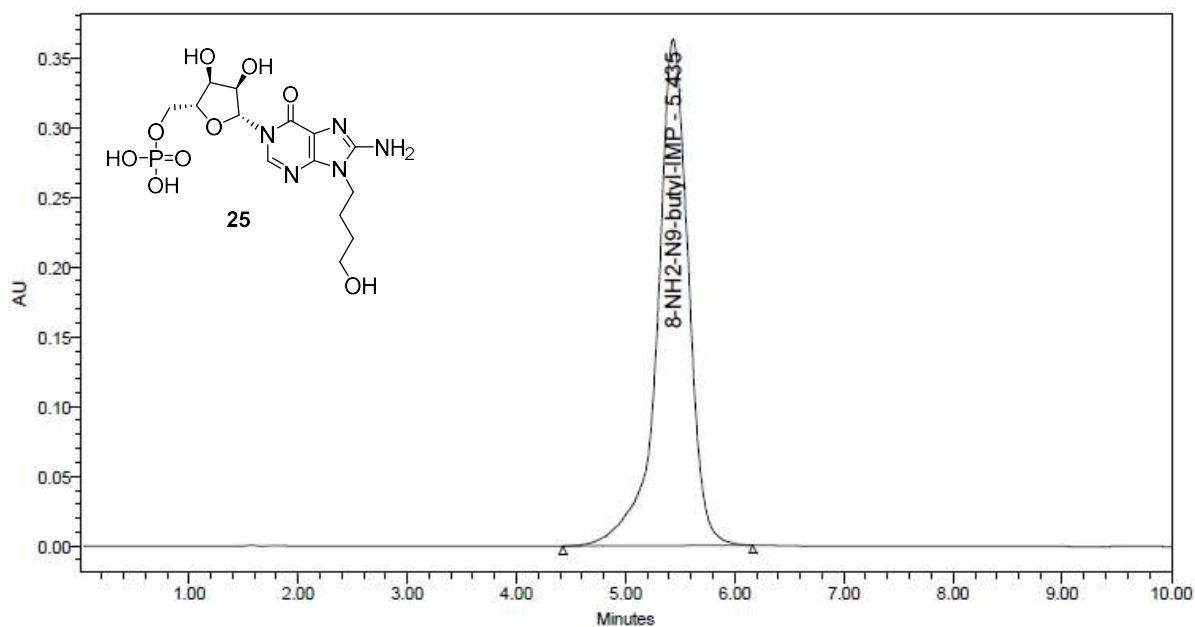

|   | Peak Name          | RT    | Area    | % Area | Height |
|---|--------------------|-------|---------|--------|--------|
| 1 | 8-NH2-N9-butyl-IMP | 5.435 | 7152416 | 100.00 | 362896 |

# **Total synthesis of L-N1-IMP analogues (26-27)**

JMS 837 T 18-20

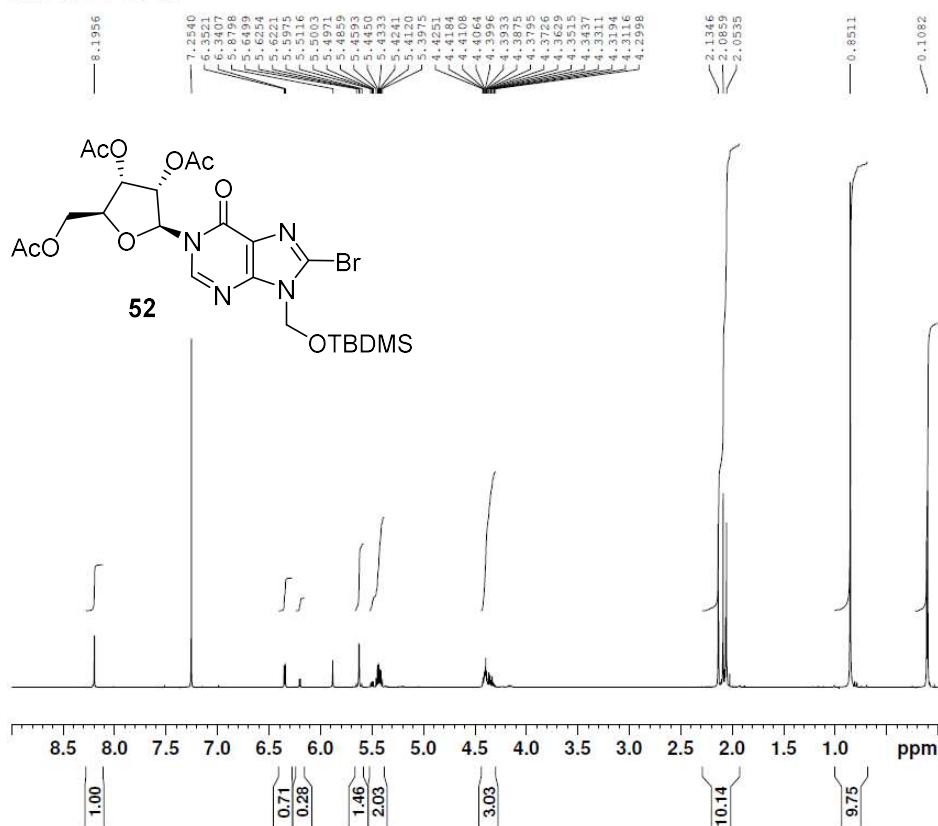

Current Data Parameters  
 NAME Jun27-2013-JMS29010  
 EXPNO 10  
 PROCNO 1

F2 - Acquisition Parameters  
 Date\_ 20130627  
 Time 12.28  
 INSTRUM AVII400  
 PROBHD 5 mm PABBO BB-  
 PULPROG zg30  
 TD 65536  
 SOLVENT CDCl3  
 NS 16  
 DS 2  
 SWH 8223.685 Hz  
 FIDRES 0.125483 Hz  
 AQ 3.9845889 sec  
 RG 64  
 DW 60.800 usec  
 DE 17.48 usec  
 TE 293.2 K  
 D1 1.00000000 sec  
 TDO 1

===== CHANNEL f1 =====  
 NUC1 1H  
 P1 11.90 usec  
 PL1 -1.00 dB  
 PL1W 12.26963711 W  
 SFO1 400.0424704 MHz

F2 - Processing parameters  
 SI 65536  
 SF 400.0399837 MHz  
 WDW EM  
 SSB 0  
 LB 0.20 Hz  
 GB 0  
 PC 1.00

JMS 837 T 18-20

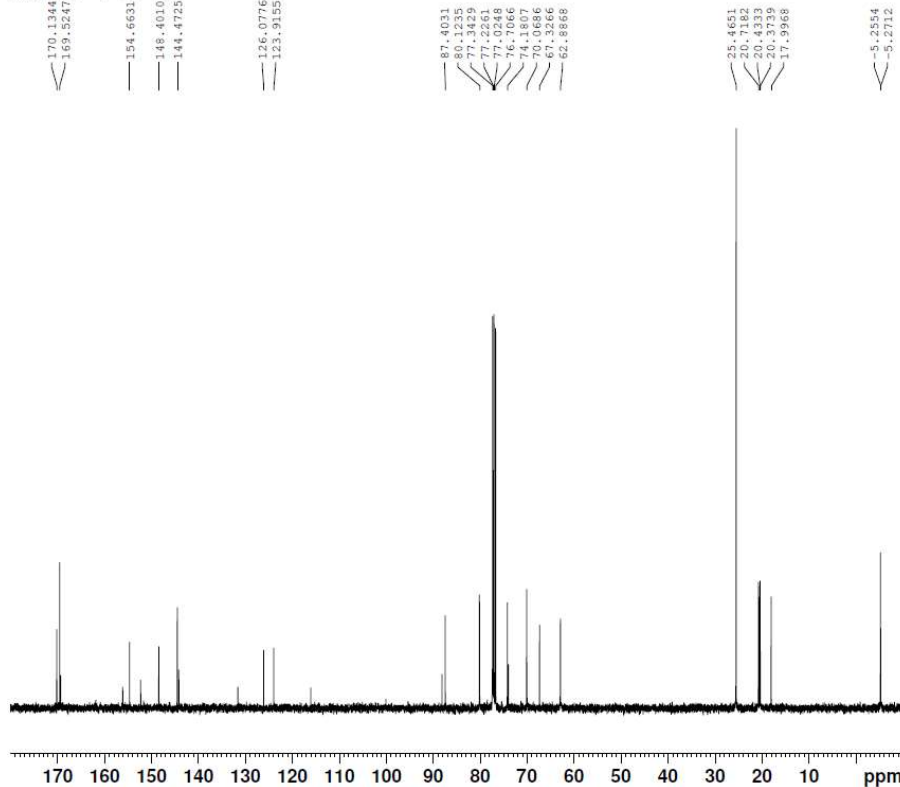

Current Data Parameters  
 NAME Jun27-2013-JMS29010  
 EXPNO 11  
 PROCNO 1

F2 - Acquisition Parameters  
 Date\_ 20130627  
 Time 12.46  
 INSTRUM AVII400  
 PROBHD 5 mm PABBO BB-  
 PULPROG zgpg30  
 TD 65536  
 SOLVENT CDCl3  
 NS 256  
 DS 4  
 SWH 24038.461 Hz  
 FIDRES 0.366798 Hz  
 AQ 1.3631488 sec  
 RG 1820  
 DW 20.800 usec  
 DE 6.50 usec  
 TE 293.2 K  
 D1 2.00000000 sec  
 D11 0.03000000 sec  
 TDO 1

===== CHANNEL f1 =====  
 NUC1 13C  
 P1 8.75 usec  
 PL1 -2.00 dB  
 PL1W 58.91986084 W  
 SFO1 100.6001970 MHz

===== CHANNEL f2 =====  
 CPDPRG2 waltz16  
 NUC2 1H  
 PCPD2 80.00 usec  
 PL2 -1.00 dB  
 PL12 15.55 dB  
 PL13 19.00 dB  
 PL2W 12.26963711 W  
 PL12W 0.27153867 W  
 PL13W 0.12269637 W  
 SFO2 400.0416002 MHz

F2 - Processing parameters  
 SI 65536  
 SF 100.5901380 MHz  
 WDW EM  
 SSB 0  
 LB 1.00 Hz  
 GB 0  
 PC 1.40

JMS841 T18-20

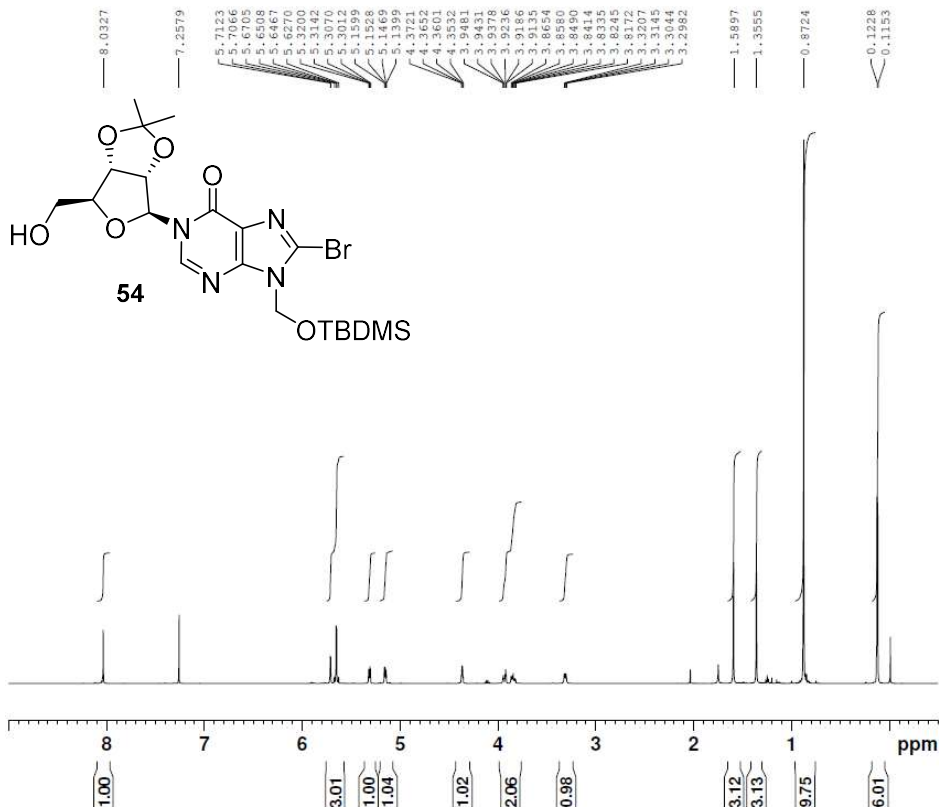

Current Data Parameters  
NAME JMS841 T18-20  
EXPNO 10  
PROCNO 1

F2 - Acquisition Parameters  
Date\_ 20130704  
Time 15.52  
INSTRUM spect  
PROBHD 5 mm PABBO BB-  
PULPROG zg30  
TD 65536  
SOLVENT CDCl3  
NS 16  
DS 2  
SWH 10330.578 Hz  
FIDRES 0.157632 Hz  
AQ 3.1719425 sec  
RG 101  
DW 48.400 usec  
DE 14.00 usec  
TE 298.2 K  
D1 1.00000000 sec  
TD0 1

===== CHANNEL f1 =====  
NUC1 1H  
P1 10.00 usec  
PL1 -0.12 dB  
PL1W 19.35150909 W  
SFO1 500.1330885 MHz

F2 - Processing parameters  
SI 32768  
SF 500.1300140 MHz  
WDW EM  
SSB 0  
LB 0.30 Hz  
GB 0  
PC 1.00

JMS841 T18-20

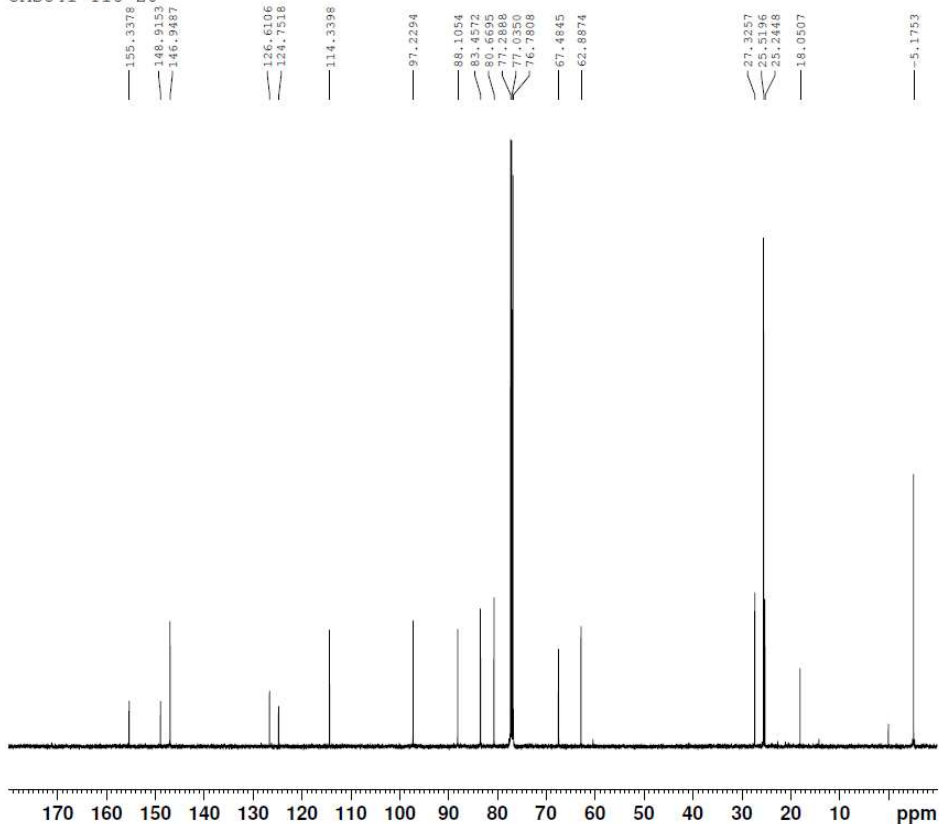

Current Data Parameters  
NAME JMS841 T18-20  
EXPNO 12  
PROCNO 1

F2 - Acquisition Parameters  
Date\_ 20130704  
Time 16.08  
INSTRUM spect  
PROBHD 5 mm PABBO BB-  
PULPROG zgpg30  
TD 65536  
SOLVENT CDCl3  
NS 1024  
DS 4  
SWH 29761.904 Hz  
FIDRES 0.454131 Hz  
AQ 1.1010048 sec  
RG 2050  
DW 16.800 usec  
DE 8.45 usec  
TE 298.2 K  
D1 2.00000000 sec  
D11 0.03000000 sec  
TD0 1

===== CHANNEL f1 =====  
NUC1 13C  
P1 9.40 usec  
PL1 -0.51 dB  
PL1W 99.92730713 W  
SFO1 125.7703643 MHz

===== CHANNEL f2 =====  
CPDPRG[2] waltz16  
NUC2 1H  
PCPD2 80.00 usec  
PL2 -0.12 dB  
PL12 17.94 dB  
PL13 21.00 dB  
PL2W 19.35150909 W  
PL12W 0.30249262 W  
PL13W 0.14952536 W  
SFO2 500.1320005 MHz

F2 - Processing parameters  
SI 32768  
SF 125.7577895 MHz  
WDW EM  
SSB 0  
LB 1.00 Hz  
GB 0  
PC 1.40

JMS 843 T 22-25

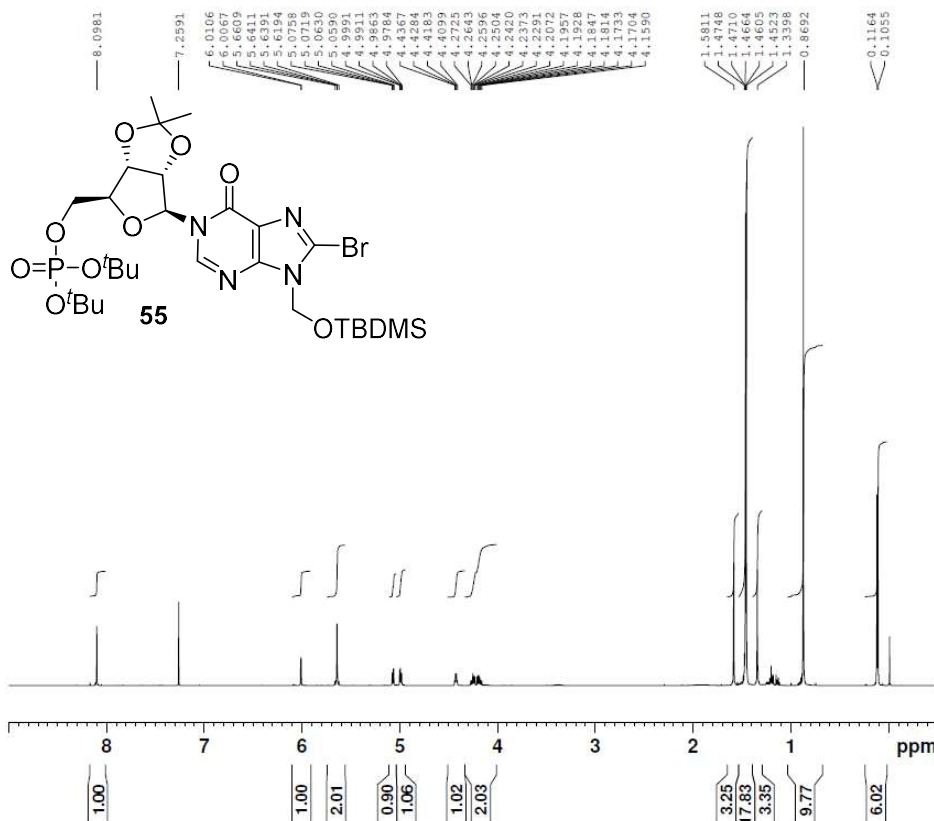

Current Data Parameters  
NAME Jul09-2013-JMS 843  
EXPNO 10  
PROCNO 1

F2 - Acquisition Parameters  
Date\_ 20130709  
Time 12.21  
INSTRUM spect  
PROBHD 5 mm PABBO BB-  
PULPROG zg30  
TD 65536  
SOLVENT CDCl3  
NS 64  
DS 2  
SWH 10330.578 Hz  
FIDRES 0.157632 Hz  
AQ 3.1719425 sec  
RG 90.5  
DW 48.400 usec  
DE 14.00 usec  
TE 298.2 K  
D1 1.0000000 sec  
TD0 1

===== CHANNEL f1 =====  
NUC1 1H  
P1 10.00 usec  
PL1 -0.12 dB  
PL1W 19.35150909 W  
SFO1 500.1330885 MHz

F2 - Processing parameters  
SI 32768  
SF 500.1300134 MHz  
WDW EM  
SSB 0  
LB 0.30 Hz  
GB 0  
PC 1.00

JMS 843 T 22-25

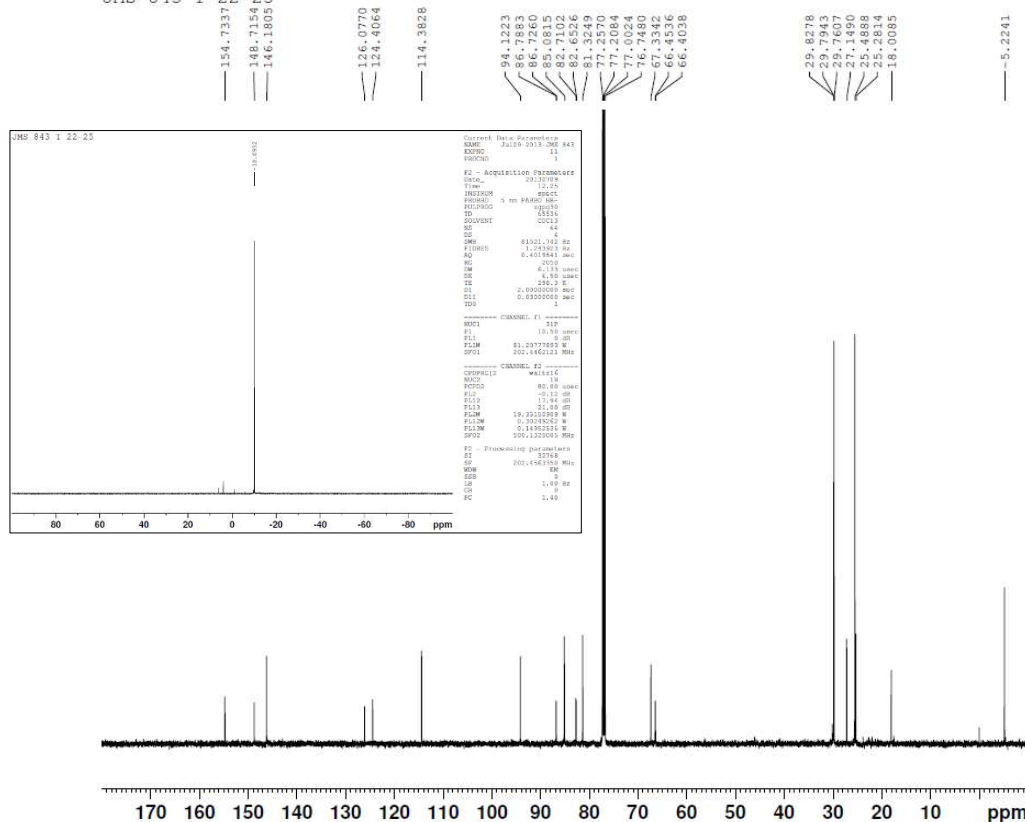

Current Data Parameters  
NAME Jul09-2013-JMS 843  
EXPNO 12  
PROCNO 1

F2 - Acquisition Parameters  
Date\_ 20130709  
Time 13.13  
INSTRUM spect  
PROBHD 5 mm PABBO BB-  
PULPROG zgpg30  
TD 65536  
SOLVENT CDCl3  
NS 676  
DS 4  
SWH 29761.904 Hz  
FIDRES 0.454131 Hz  
AQ 1.1010048 sec  
RG 2050  
DW 16.800 usec  
DE 8.45 usec  
TE 298.2 K  
D1 2.0000000 sec  
D11 0.0300000 sec  
TD0 1

===== CHANNEL f1 =====  
NUC1 13C  
P1 9.40 usec  
PL1 -0.51 dB  
PL1W 99.92730713 W  
SFO1 125.7703643 MHz

===== CHANNEL f2 =====  
CPDPRG2 waltz16  
NUC2 1H  
PCPD2 80.00 usec  
PL2 -0.12 dB  
PL12 17.94 dB  
PL13 21.00 dB  
PL2W 19.35150909 W  
PL12W 0.30249262 W  
PL13W 0.14952536 W  
SFO2 500.1320005 MHz

F2 - Processing parameters  
SI 32768  
SF 125.7577932 MHz  
WDW EM  
SSB 0  
LB 1.00 Hz  
GB 0  
PC 1.40

JMS 845 HPLC

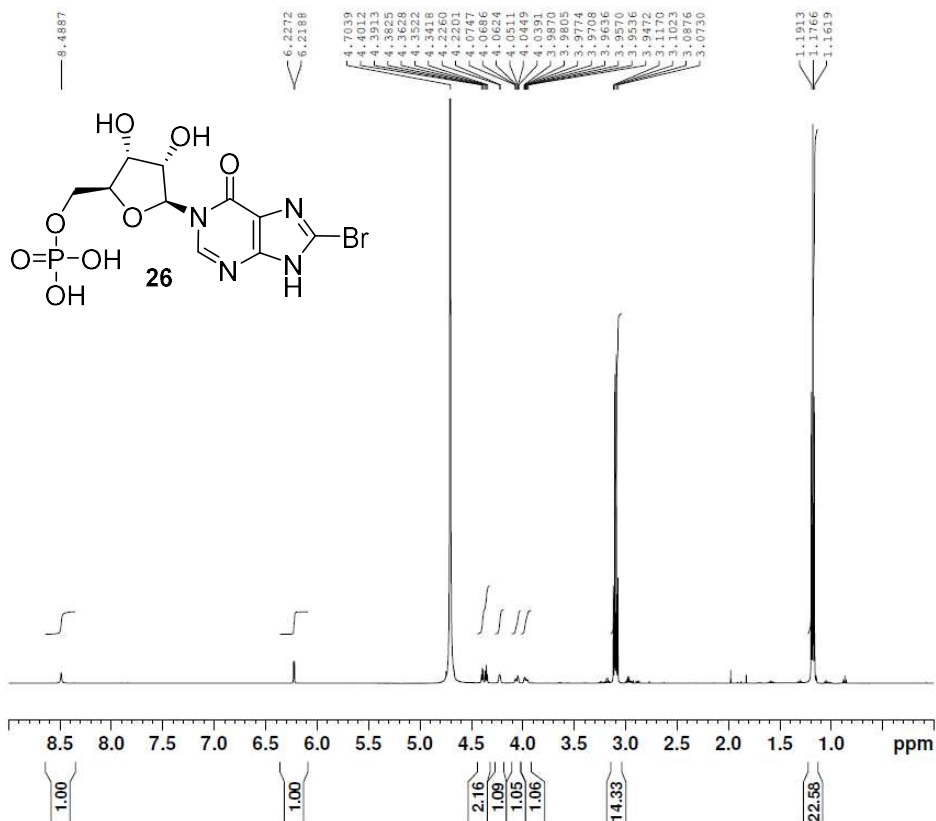

Current Data Parameters  
NAME JMS 845 HPLC  
EXPNO 10  
PROCNO 1

F2 - Acquisition Parameters  
Date\_ 20130718  
Time 15.38  
INSTRUM spect  
PROBHD 5 mm PABBO BB-  
PULPROG zg30  
TD 65536  
SOLVENT D2O  
NS 128  
DS 0  
SWH 10330.578 Hz  
FIDRES 0.157632 Hz  
AQ 3.1719425 sec  
RG 80.6  
DW 48.400 usec  
DE 6.50 usec  
TE 298.2 K  
D1 2.00000000 sec  
TD0 1

===== CHANNEL f1 =====  
NUC1 1H  
P1 10.00 usec  
PL1 -0.12 dB  
PL1W 19.35150909 W  
SFO1 500.1330885 MHz

F2 - Processing parameters  
SI 32768  
SF 500.1300000 MHz  
WDW EM  
SSB 0  
LB 0.30 Hz  
GB 0  
PC 1.00

JMS 845 HPLC

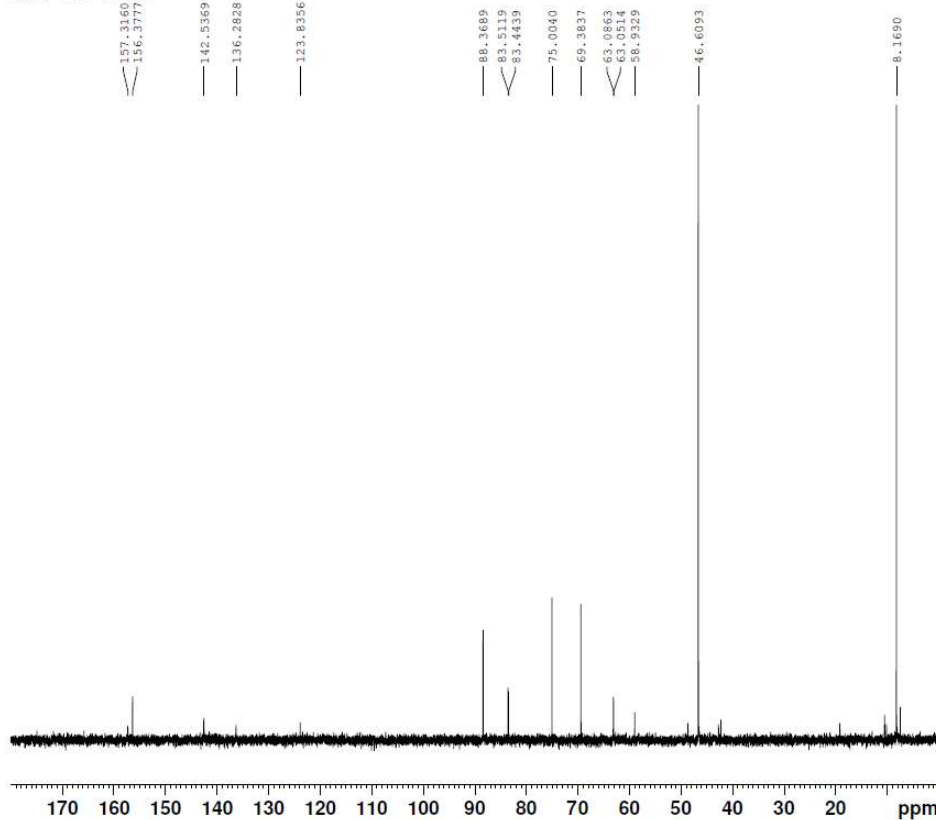

Current Data Parameters  
NAME JMS 845 HPLC  
EXPNO 19  
PROCNO 1

F2 - Acquisition Parameters  
Date\_ 20130719  
Time 9.36  
INSTRUM spect  
PROBHD 5 mm PABBO BB-  
PULPROG zgpg30  
TD 65536  
SOLVENT D2O  
NS 10240  
DS 4  
SWH 29761.904 Hz  
FIDRES 0.454131 Hz  
AQ 1.1010048 sec  
RG 2050  
DW 16.800 usec  
DE 8.45 usec  
TE 298.2 K  
D1 2.00000000 sec  
D11 0.03000000 sec  
TD0 1

===== CHANNEL f1 =====  
NUC1 13C  
P1 9.40 usec  
PL1 -0.51 dB  
PL1W 99.92730713 W  
SFO1 125.7703643 MHz

===== CHANNEL f2 =====  
CPDPRG[2] waltz16  
NUC2 1H  
PCPD2 80.00 usec  
PL2 -0.12 dB  
PL12 17.94 dB  
PL13 21.00 dB  
PL2W 19.35150909 W  
PL12W 0.30249262 W  
PL13W 0.14952536 W  
SFO2 500.1320005 MHz

F2 - Processing parameters  
SI 32768  
SF 125.7577890 MHz  
WDW EM  
SSB 0  
LB 1.00 Hz  
GB 0  
PC 1.40



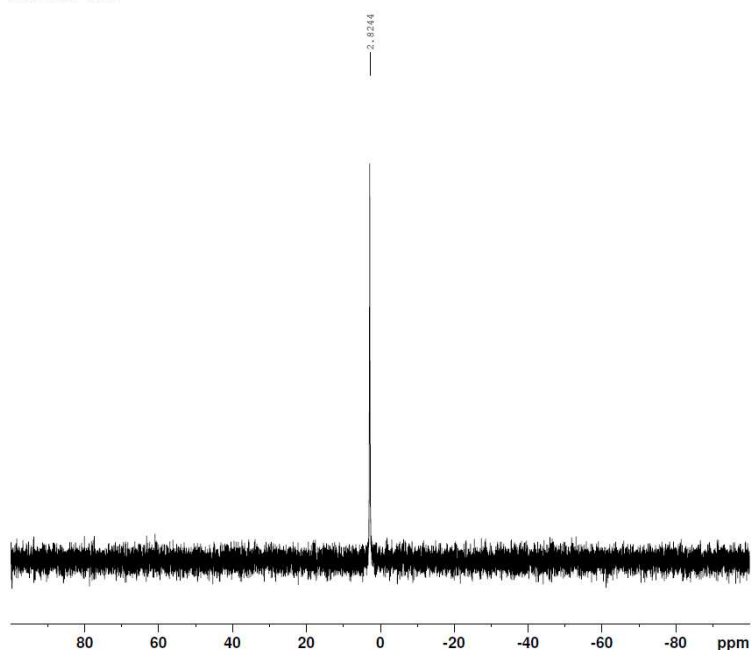

Current Data Parameters  
NAME JMS 845 HPLC  
EXPNO 11  
PROCNO 1

F2 - Acquisition Parameters  
Date\_ 20130718  
Time 15.59  
INSTRUM spect  
PROBHD 5 mm PARBO BB-  
PULPROG zgpg30  
TD 65536  
SOLVENT D2O  
NS 256  
DS 4  
SWH 81521.742 Hz  
FIDRES 1.243923 Hz  
AQ 0.4019541 sec  
RG 2050  
DW 6.133 usec  
DE 6.50 usec  
TE 298.2 K  
D1 2.0000000 sec  
D11 0.0300000 sec  
TD0 1

===== CHANNEL f1 =====  
NUC1 31P  
P1 10.50 usec  
PL1 0 dB  
PL1W 81.20777893 W  
SFO1 202.4462121 MHz

===== CHANNEL f2 =====  
CPDPRG2 waltz16  
NUC2 1H  
PCPD2 80.00 usec  
PL2 -0.12 dB  
PL12 17.94 dB  
PL13 21.00 dB  
PL2W 19.35150909 W  
PL12W 0.30249262 W  
PL13W 0.14952536 W  
SFO2 500.1320005 MHz

F2 - Processing parameters  
SI 32768  
SF 202.4563350 MHz  
WDW EM  
SSB 0  
LB 1.00 Hz  
GB 0  
PC 1.40

## SAMPLE INFORMATION

Sample Name: JMS 845 Batch 1 from UV  
Sample Type: Unknown  
Vial: 56  
Injection #: 1  
Injection Volume: 10.00 ul  
Run Time: 30.0 Minutes  
Sample Set Name: JMS 845 Batch 1

Acquired By: Joanna  
Date Acquired: 26/09/2013 3:32:14 PM  
Acq. Method Set: isocratic new PDA Jo  
Date Processed: 27/09/2013 3:44:26 PM  
Processing Method: 8 Br L N1 IMP  
Channel Name: WvIn Ch1  
Proc. Chnl. Descr.: PDA 254.0 nm

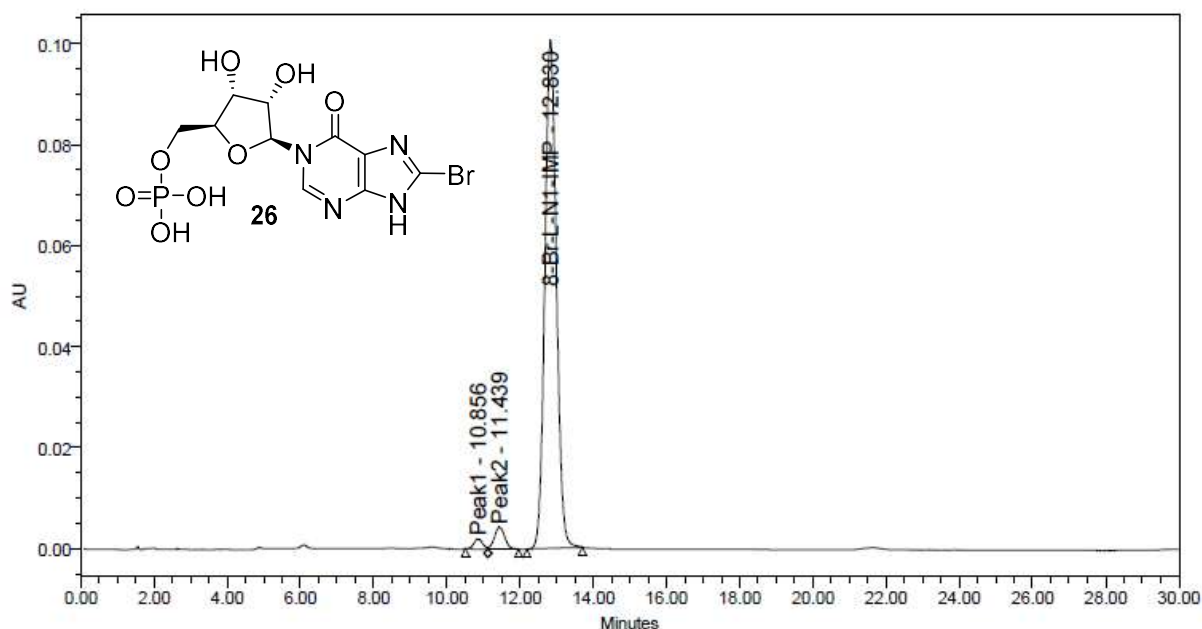

|   | Peak Name     | RT     | Area    | % Area | Height |
|---|---------------|--------|---------|--------|--------|
| 1 | Peak1         | 10.856 | 32649   | 1.41   | 2001   |
| 2 | Peak2         | 11.439 | 84320   | 3.64   | 4337   |
| 3 | 8-Br-L-N1-IMP | 12.830 | 2197357 | 94.95  | 100598 |



JMS 847 HPLC

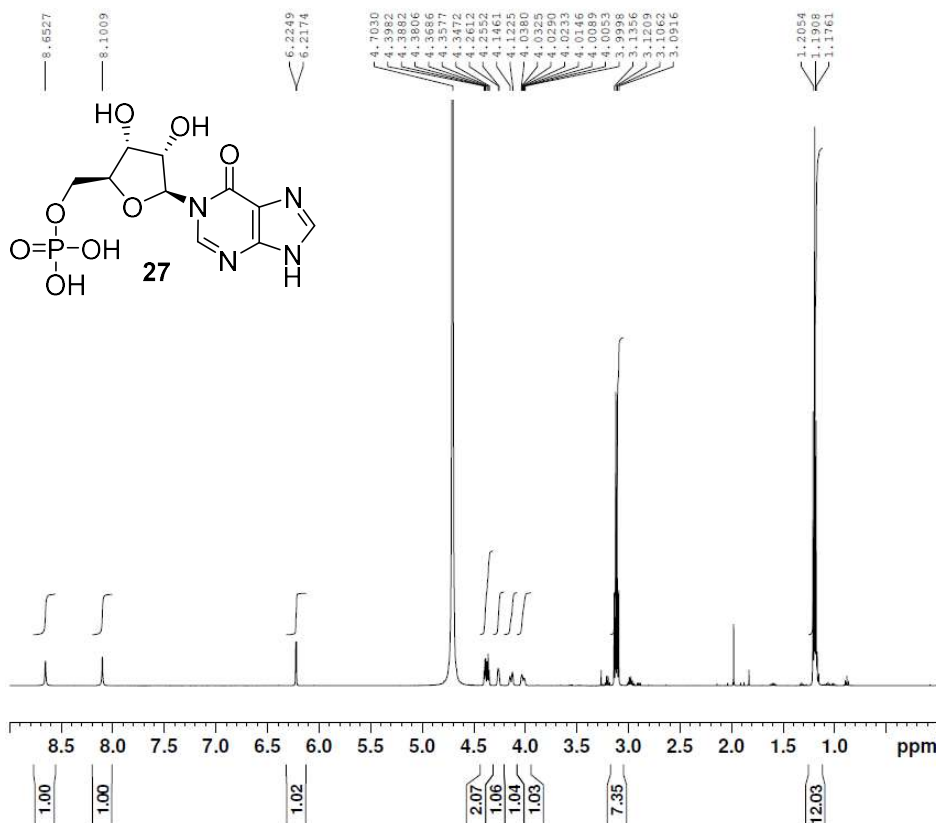

Current Data Parameters  
NAME JMS 847 HPLC  
EXPNO 10  
PROCNO 1

F2 - Acquisition Parameters  
Date\_ 20130716  
Time 15.41  
INSTRUM spect  
PROBHD 5 mm PABBO BB-  
PULPROG zg30  
TD 65536  
SOLVENT D2O  
NS 128  
DS 0  
SWH 10330.578 Hz  
FIDRES 0.157632 Hz  
AQ 3.1719425 sec  
RG 80.6  
DW 48.400 usec  
DE 6.50 usec  
TE 298.2 K  
D1 2.00000000 sec  
TD0 1

===== CHANNEL f1 =====  
NUC1 1H  
P1 10.00 usec  
PL1 -0.12 dB  
PL1W 19.35150909 W  
SFO1 500.1330885 MHz

F2 - Processing parameters  
SI 32768  
SF 500.1300000 MHz  
WDW EM  
SSB 0  
LB 0.30 Hz  
GB 0  
PC 1.00

JMS847 conc

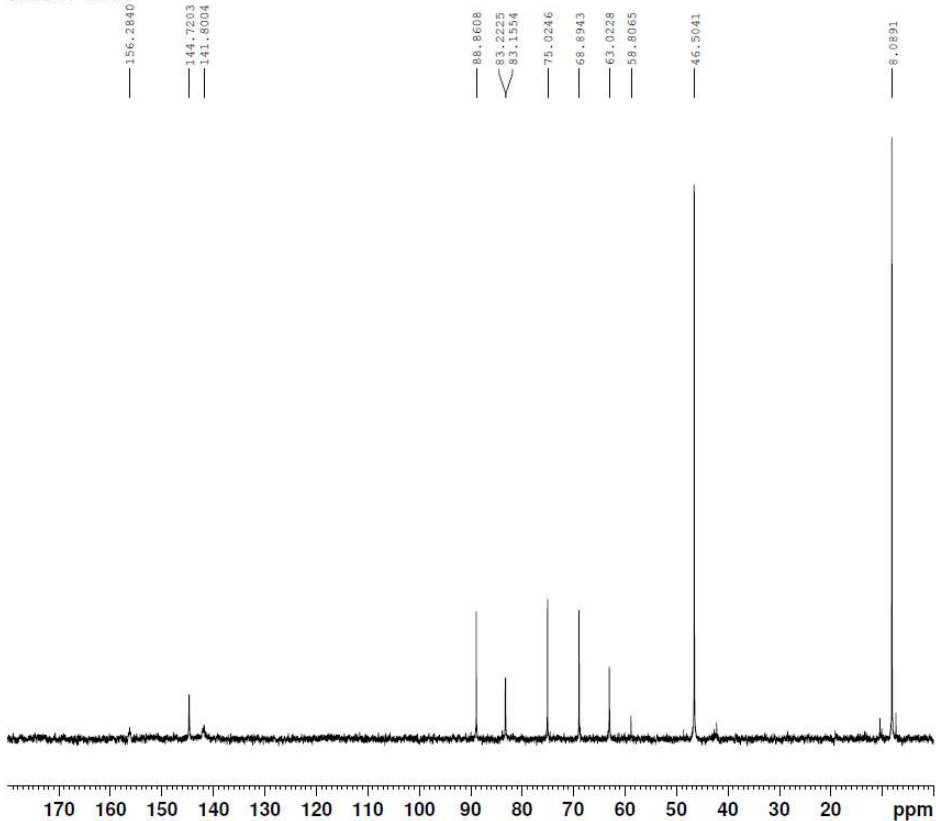

Current Data Parameters  
NAME JMS847 conc  
EXPNO 11  
PROCNO 1

F2 - Acquisition Parameters  
Date\_ 20130725  
Time 17.00  
INSTRUM spect  
PROBHD 5 mm PABBO BB-  
PULPROG zgpg30  
TD 65536  
SOLVENT D2O  
NS 16384  
DS 4  
SWH 29761.904 Hz  
FIDRES 0.454131 Hz  
AQ 1.1010048 sec  
RG 2050  
DW 16.800 usec  
DE 8.45 usec  
TE 293.5 K  
D1 2.00000000 sec  
D11 0.03000000 sec  
TD0 1

===== CHANNEL f1 =====  
NUC1 13C  
P1 9.40 usec  
PL1 -0.51 dB  
PL1W 99.92730713 W  
SFO1 125.7703643 MHz

===== CHANNEL f2 =====  
CPDPRG[2] waltz16  
NUC2 1H  
PCPD2 80.00 usec  
PL2 -0.12 dB  
PL12 17.94 dB  
PL13 21.00 dB  
PL2W 19.35150909 W  
PL12W 0.30249262 W  
PL13W 0.14952536 W  
SFO2 500.1320005 MHz

F2 - Processing parameters  
SI 32768  
SF 125.7577890 MHz  
WDW EM  
SSB 0  
LB 3.00 Hz  
GB 0  
PC 1.40

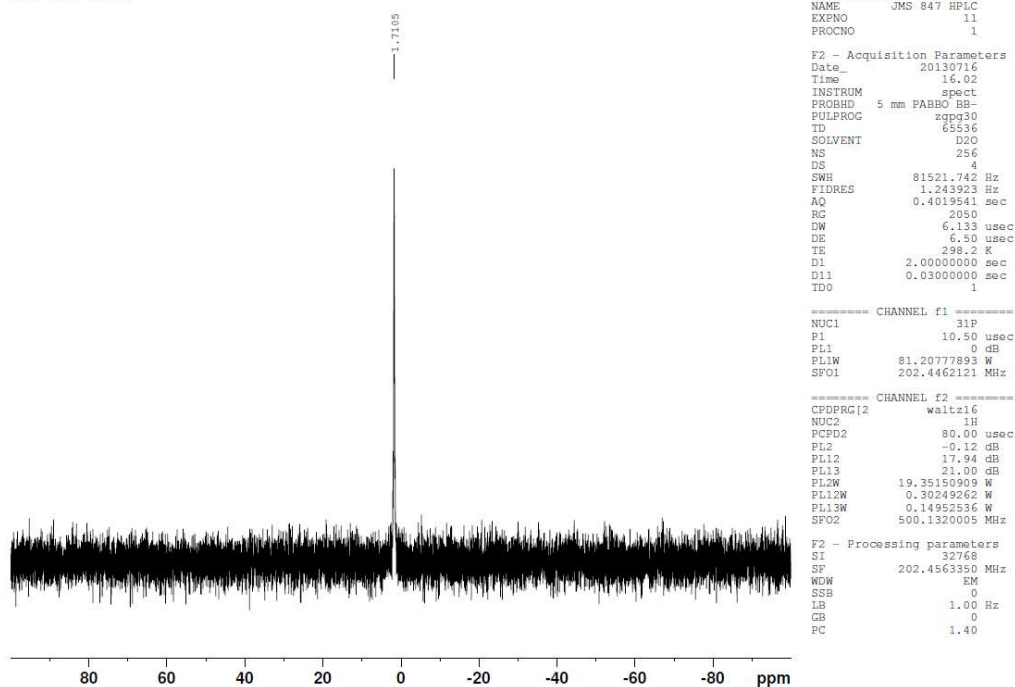

## SAMPLE INFORMATION

Sample Name: JMS 847 uv  
Sample Type: Unknown  
Vial: 2  
Injection #: 1  
Injection Volume: 10.00 ul  
Run Time: 15.0 Minutes  
Sample Set Name: JMS 847 and 845 uv

Acquired By: Joanna  
Date Acquired: 24/07/2013 3:10:17 PM  
Acq. Method Set: isocratic new PDA Jo  
Date Processed: 27/09/2013 3:48:56 PM  
Processing Method: L N1 IMP  
Channel Name: Wvin Ch1  
Proc. Chnl. Descr.: PDA 254.0 nm

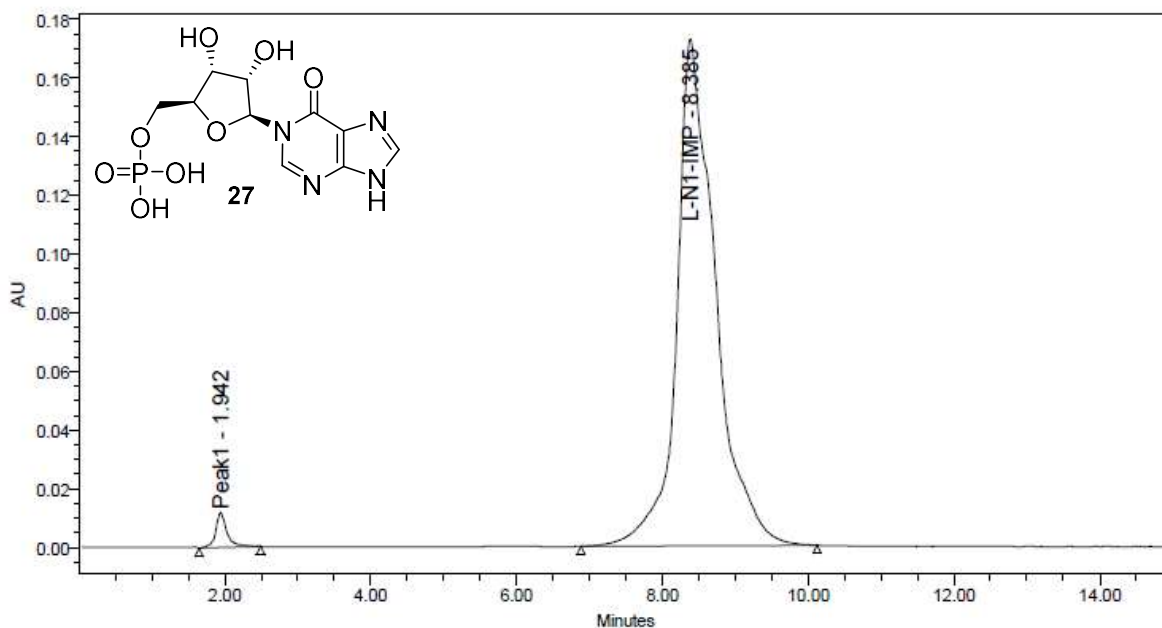

|   | Peak Name | RT    | Area    | % Area | Height |
|---|-----------|-------|---------|--------|--------|
| 1 | Peak1     | 1.942 | 129676  | 2.00   | 11947  |
| 2 | L-N1-IMP  | 8.385 | 6365515 | 98.00  | 172494 |

JMS 870 T 6

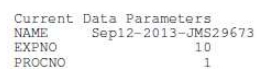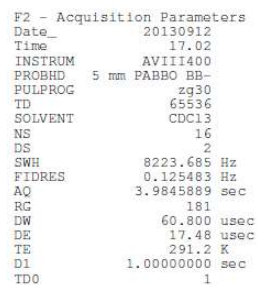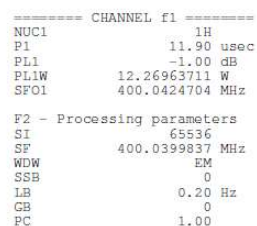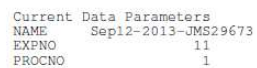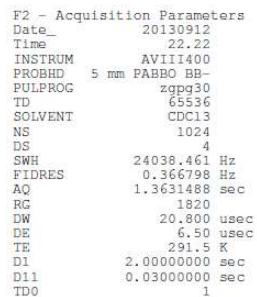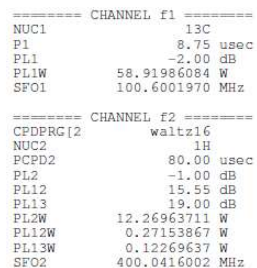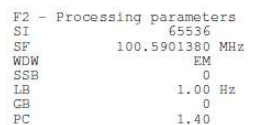

JMS879 HPLC

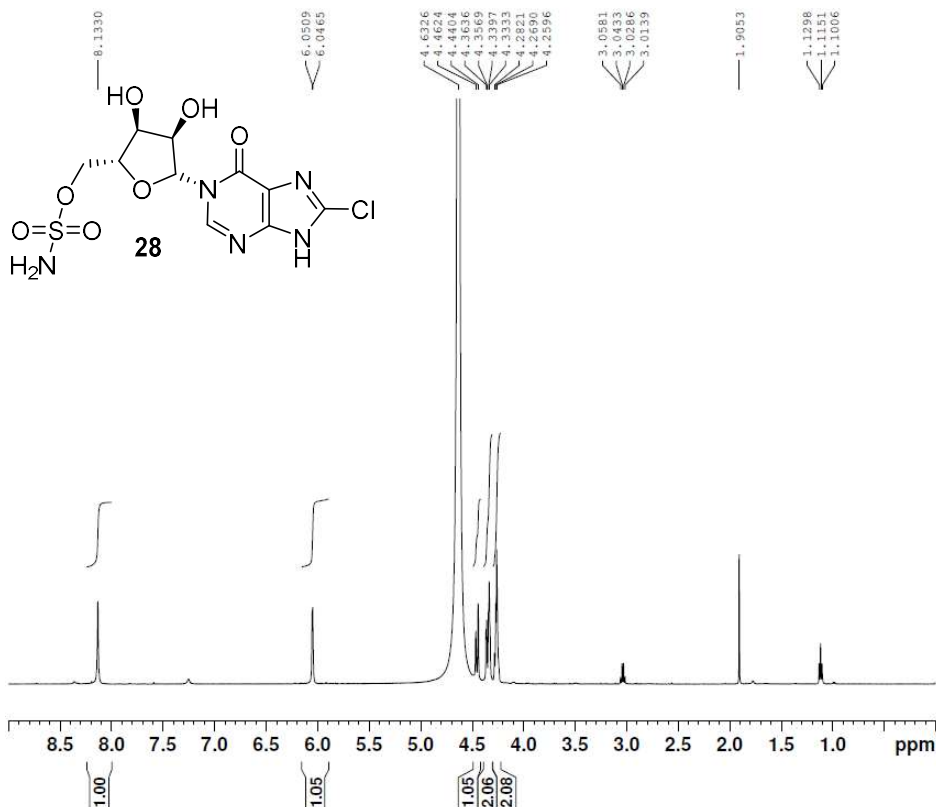

Current Data Parameters  
NAME JMS879 HPLC  
EXPNO 10  
PROCNO 1

F2 - Acquisition Parameters  
Date\_ 20131129  
Time 5.53  
INSTRUM spect  
PROBHD 5 mm PABBO BB-  
PULPROG zg30  
TD 65536  
SOLVENT D2O  
NS 64  
DS 2  
SWH 10330.578 Hz  
FIDRES 0.157632 Hz  
AQ 3.1719425 sec  
RG 228  
DW 48.400 usec  
DE 14.00 usec  
TE 298.2 K  
D1 1.00000000 sec  
TD0 1

===== CHANNEL f1 =====  
NUC1 1H  
P1 10.00 usec  
PL1 -0.12 dB  
PL1W 19.35150909 W  
SFO1 500.1330885 MHz

F2 - Processing parameters  
SI 32768  
SF 500.1300350 MHz  
WDW EM  
SSB 0  
LB 0.30 Hz  
GB 0  
PC 1.00

JMS879 HPLC

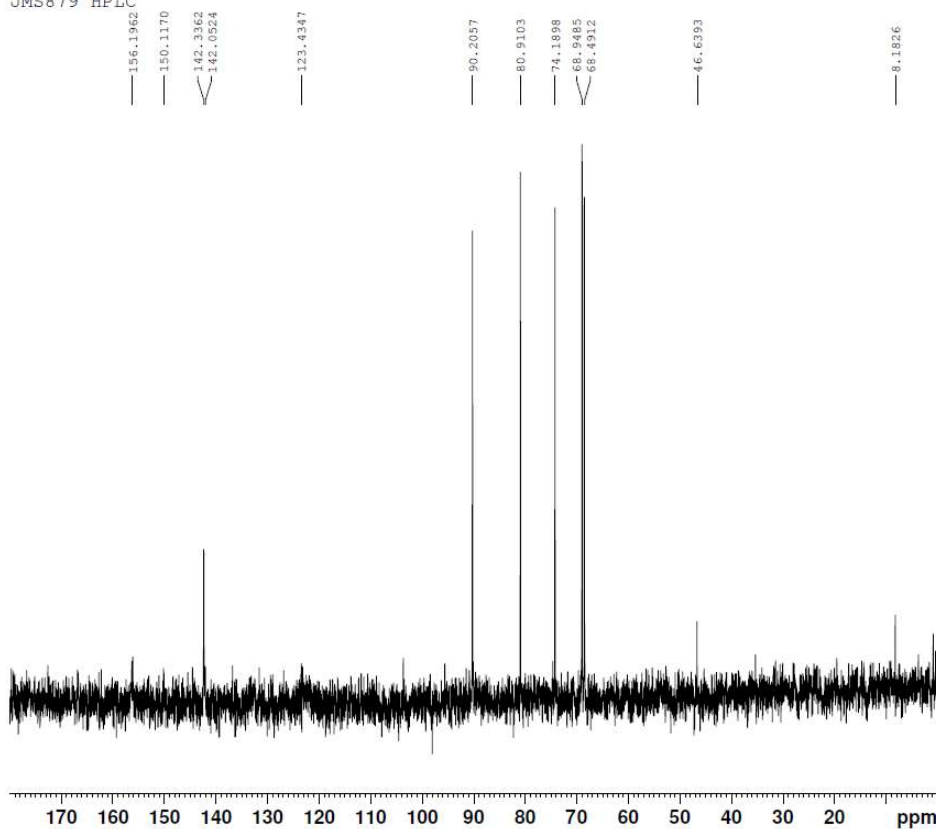

Current Data Parameters  
NAME JMS879 HPLC  
EXPNO 17  
PROCNO 1

F2 - Acquisition Parameters  
Date\_ 20131201  
Time 23.06  
INSTRUM spect  
PROBHD 5 mm PABBO BB-  
PULPROG zgpg30  
TD 65536  
SOLVENT D2O  
NS 10240  
DS 4  
SWH 29761.904 Hz  
FIDRES 0.454131 Hz  
AQ 1.1010048 sec  
RG 2050  
DW 16.800 usec  
DE 8.45 usec  
TE 298.2 K  
D1 2.00000000 sec  
D11 0.03000000 sec  
TD0 1

===== CHANNEL f1 =====  
NUC1 13C  
P1 9.40 usec  
PL1 -0.51 dB  
PL1W 99.92730713 W  
SFO1 125.7703643 MHz

===== CHANNEL f2 =====  
CPDPRG[2] waltz16  
NUC2 1H  
PCPD2 80.00 usec  
PL2 -0.12 dB  
PL12 17.94 dB  
PL13 21.00 dB  
PL2W 19.35150909 W  
PL12W 0.30249262 W  
PL13W 0.14952536 W  
SFO2 500.1320005 MHz

F2 - Processing parameters  
SI 32768  
SF 125.7577890 MHz  
WDW EM  
SSB 0  
LB 3.00 Hz  
GB 0  
PC 1.40

## SAMPLE INFORMATION

Sample Name: JMS 879 B9  
 Sample Type: Unknown  
 Vial: 94  
 Injection #: 1  
 Injection Volume: 10.00 ul  
 Run Time: 20.0 Minutes  
 Sample Set Name: JMS 879 HPLC B

Acquired By: Joanna  
 Date Acquired: 27/11/2013 3:35:18 AM  
 Acq. Method Set: RP18 LC  
 Date Processed: 18/12/2013 11:48:24 AM  
 Processing Method: 8Cl\_N1\_IMS in MeCN\_H2O  
 Channel Name: WvInCh1  
 Proc. Chnl. Descr.: PDA 262.1 nm

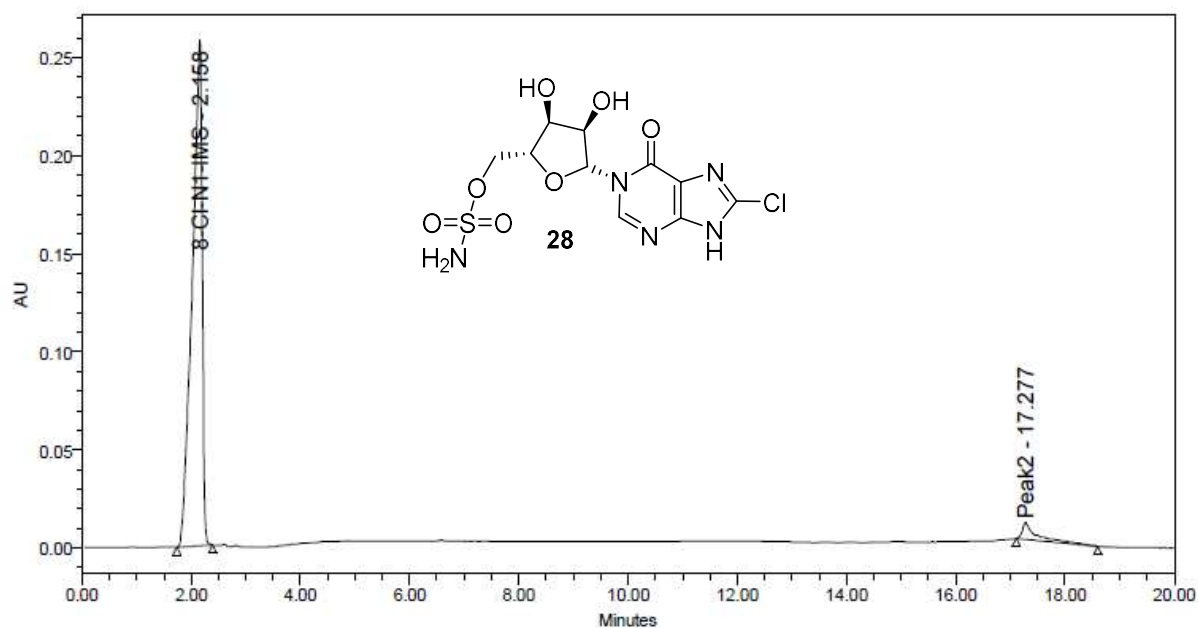

|   | Peak Name   | RT     | Area    | % Area | Height |
|---|-------------|--------|---------|--------|--------|
| 1 | 8-Cl-N1-IMS | 2.158  | 3256505 | 95.31  | 257699 |
| 2 | Peak2       | 17.277 | 160233  | 4.69   | 8449   |

JMS 899 T 10-11

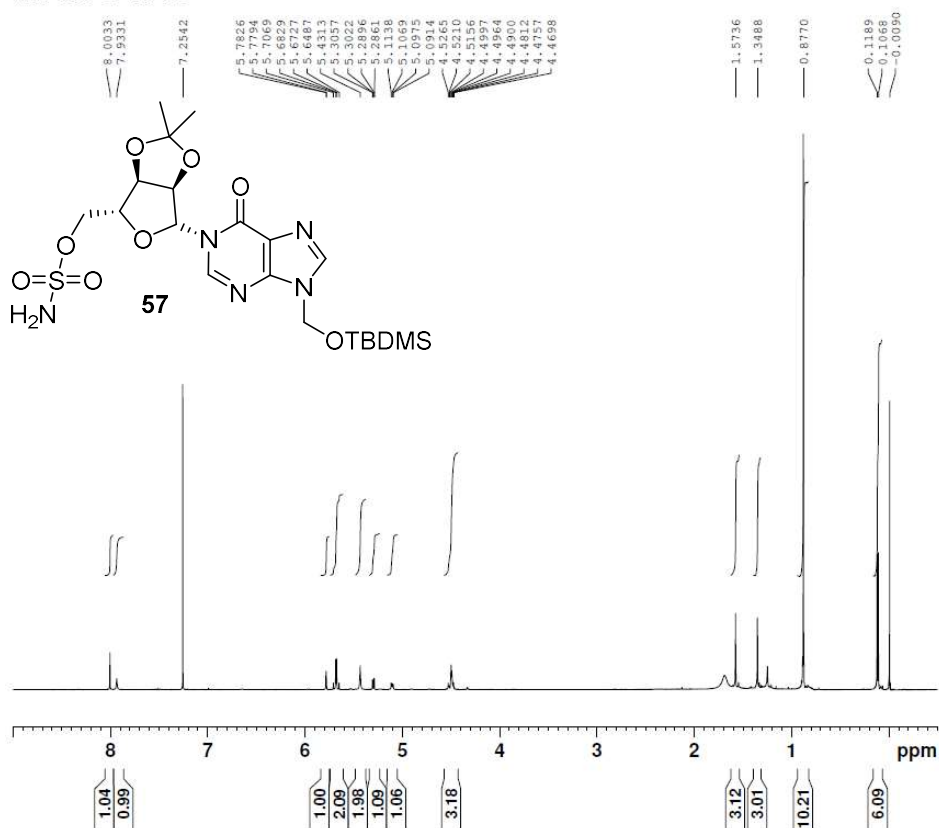

Current Data Parameters  
NAME Oct21-2013-JMS30022  
EXPNO 10  
PROCNO 1

F2 - Acquisition Parameters  
Date\_ 20131021  
Time 15.50  
INSTRUM AVIII400  
PROBHD 5 mm PABBO BB-  
PULPROG zg30  
TD 65536  
SOLVENT CDCl3  
NS 16  
DS 2  
SWH 8223.685 Hz  
FIDRES 0.125483 Hz  
AQ 3.9845889 sec  
RG 228  
DW 60.800 usec  
DE 17.48 usec  
TE 293.2 K  
D1 1.00000000 sec  
TD0 1

===== CHANNEL f1 =====  
NUC1 1H  
P1 11.90 usec  
PL1 -1.00 dB  
PL1W 12.26963711 W  
SFO1 400.0424704 MHz

F2 - Processing parameters  
SI 65536  
SF 400.0399837 MHz  
WDW EM  
SSB 0  
LB 0.20 Hz  
GB 0  
PC 1.00

JMS899 T10-11

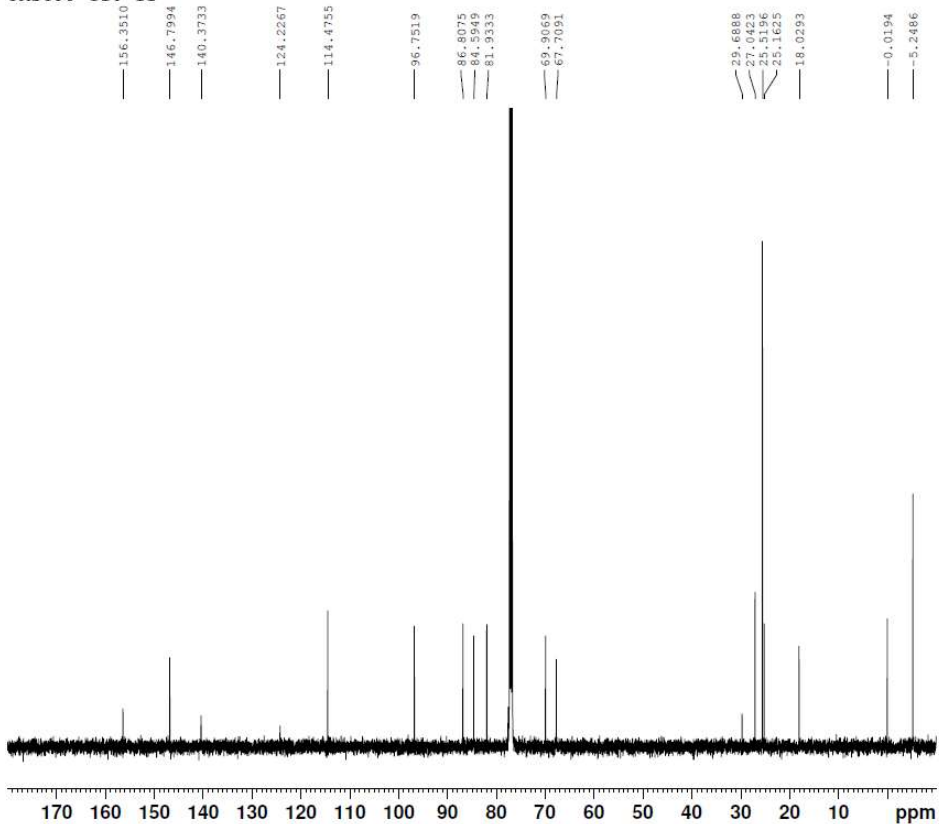

Current Data Parameters  
NAME JMS899 T10-11  
EXPNO 16  
PROCNO 1

F2 - Acquisition Parameters  
Date\_ 20131022  
Time 14.48  
INSTRUM spect  
PROBHD 5 mm PABBO BB-  
PULPROG zgpg30  
TD 65536  
SOLVENT CDCl3  
NS 4096  
DS 4  
SWH 29761.904 Hz  
FIDRES 0.454131 Hz  
AQ 1.1010048 sec  
RG 2050  
DW 16.800 usec  
DE 8.45 usec  
TE 298.2 K  
D1 2.00000000 sec  
D11 0.03000000 sec  
TD0 1

===== CHANNEL f1 =====  
NUC1 13C  
P1 9.40 usec  
PL1 -0.51 dB  
PL1W 99.92730713 W  
SFO1 125.7703643 MHz

===== CHANNEL f2 =====  
CPDPRG[2] waltz16  
NUC2 1H  
PCPD2 80.00 usec  
PL2 -0.12 dB  
PL12 17.94 dB  
PL13 21.00 dB  
PL2W 19.35150909 W  
PL12W 0.30249262 W  
PL13W 0.14952536 W  
SFO2 500.1320005 MHz

F2 - Processing parameters  
SI 32768  
SF 125.7577914 MHz  
WDW EM  
SSB 0  
LB 1.00 Hz  
GB 0  
PC 1.40



JMS 908 D2O

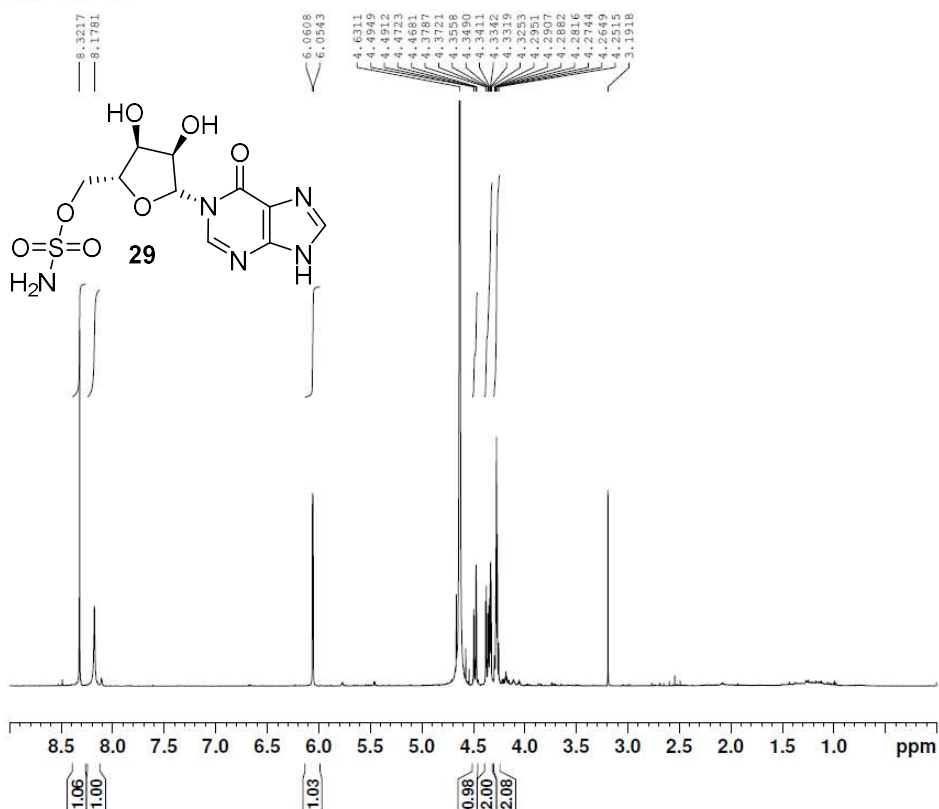

Current Data Parameters  
NAME JMS 908-2  
EXPNO 11  
PROCNO 1

F2 - Acquisition Parameters  
Date\_ 20131101  
Time 16.42  
INSTRUM spect  
PROBHD 5 mm PABBO BB-  
PULPROG zg30  
TD 65536  
SOLVENT D2O  
NS 64  
DS 2  
SWH 10330.578 Hz  
FIDRES 0.157632 Hz  
AQ 3.1719425 sec  
RG 228  
DW 48.400 usec  
DE 14.00 usec  
TE 298.2 K  
D1 1.00000000 sec  
TD0 1

===== CHANNEL f1 =====  
NUC1 1H  
P1 10.00 usec  
PL1 -0.12 dB  
PL1W 19.35150909 W  
SFO1 500.1330885 MHz

F2 - Processing parameters  
SI 32768  
SF 500.1300364 MHz  
WDW EM  
SSB 0  
LB 0.30 Hz  
GB 0  
PC 1.00

JMS 908 D2O

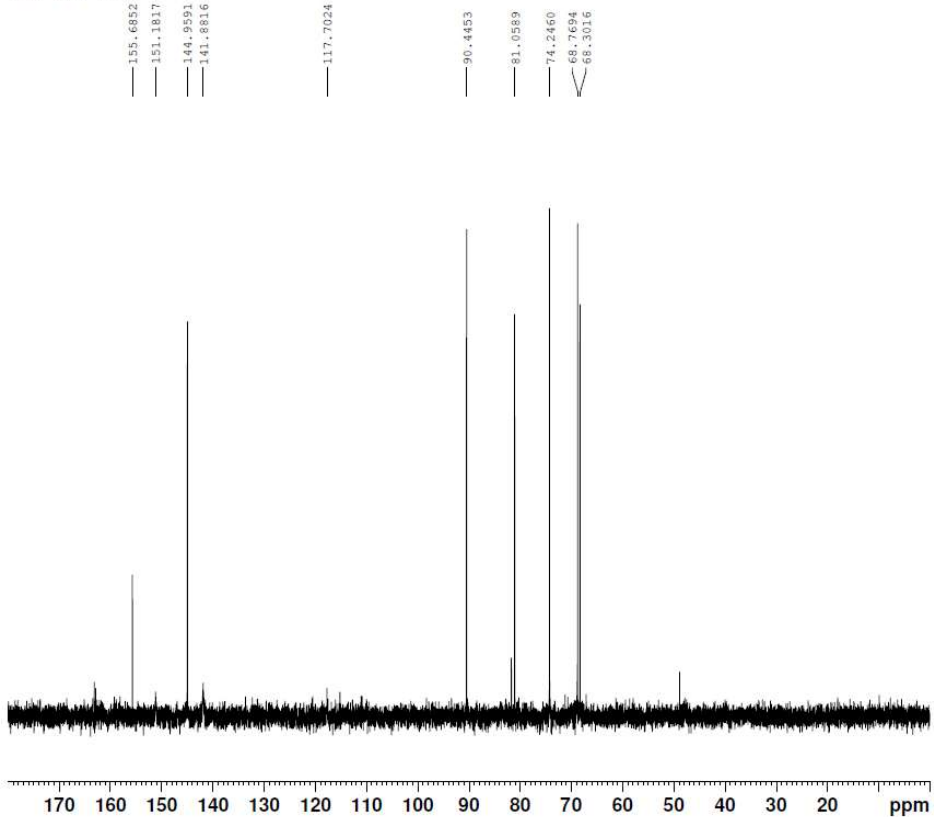

Current Data Parameters  
NAME JMS 908-2  
EXPNO 17  
PROCNO 1

F2 - Acquisition Parameters  
Date\_ 20131102  
Time 22.14  
INSTRUM spect  
PROBHD 5 mm PABBO BB-  
PULPROG zgpg30  
TD 65536  
SOLVENT D2O  
NS 20480  
DS 4  
SWH 29761.904 Hz  
FIDRES 0.454131 Hz  
AQ 1.1010048 sec  
RG 2050  
DW 16.800 usec  
DE 8.45 usec  
TE 298.2 K  
D1 2.00000000 sec  
D11 0.03000000 sec  
TD0 1

===== CHANNEL f1 =====  
NUC1 13C  
P1 9.40 usec  
PL1 -0.51 dB  
PL1W 99.92730713 W  
SFO1 125.7703643 MHz

===== CHANNEL f2 =====  
CPDPRG12 waltz16  
NUC2 1H  
PCPD2 80.00 usec  
PL2 -0.12 dB  
PL12 17.94 dB  
PL13 21.00 dB  
PL2W 19.35150909 W  
PL12W 0.30249262 W  
PL13W 0.14952536 W  
SFO2 500.1320005 MHz

F2 - Processing parameters  
SI 32768  
SF 125.7577890 MHz  
WDW EM  
SSB 0  
LB 1.00 Hz  
GB 0  
PC 1.40

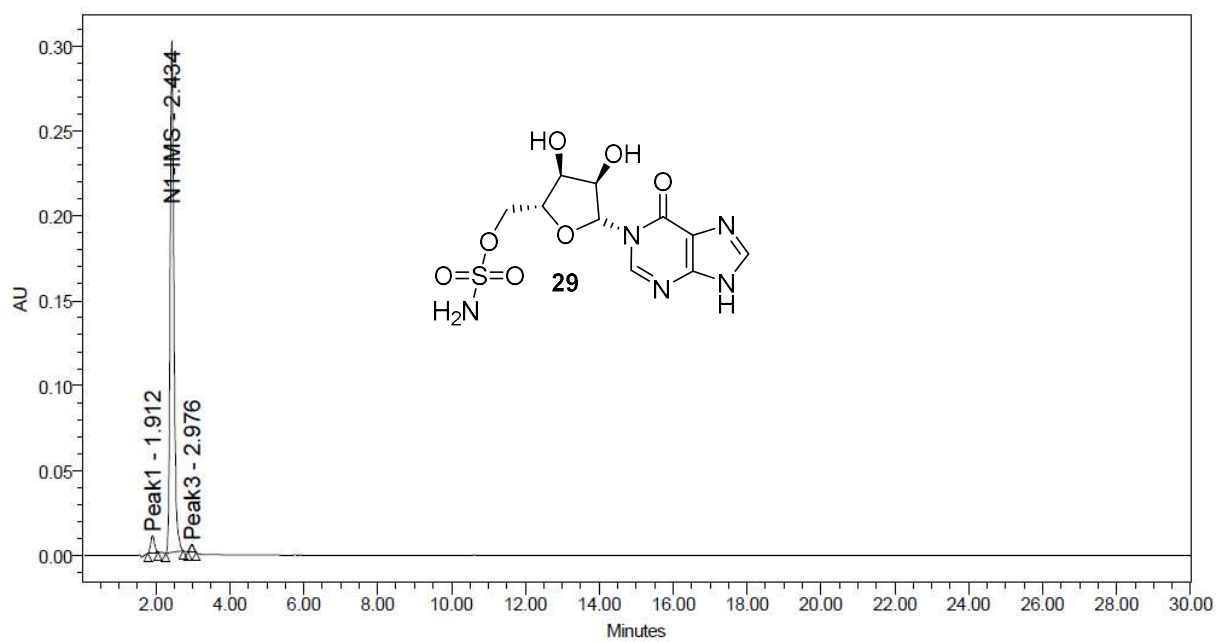

|   | Peak Name | RT    | Area    | % Area | Height |
|---|-----------|-------|---------|--------|--------|
| 1 | Peak1     | 1.912 | 73083   | 3.25   | 10284  |
| 2 | N1-IMS    | 2.434 | 2148227 | 95.41  | 301144 |
| 3 | Peak3     | 2.976 | 30303   | 1.35   | 4335   |
